# Supplementary material
Source: publisher figshare collection journal article supplement (https://acs.figshare.com/ndownloader/files/3786520)
Supplement: Supplementary file 1 [file 3786520]

data_axmto
_publ_section_title
;
Selective Crystal Growth and Structural, Optical, and Electronic Studies of
Mn~3~Ta~2~O~8~
;
loop_
_publ_author_name
_publ_author_address
_publ_author_footnote
_publ_author_email
'Rickert, Karl'
;
Department of Chemistry
Northwestern University
2145 Sheridan Rd.
Evanston, IL, 60208
;
.
.
'Pozzi, Eric'
;
Department of Chemistry
Northwestern University
2145 Sheridan Rd.
Evanston, IL, 60208
;
.
.
'Khanal, Rabi'
;
Department of Physics
Missouri University of Science & Technology
Rolla, MO 65409
;
.
.
'Onoue, Masatoshi'
;
Department of Physics and Astronomy
Northwestern University
2145 Sheridan Rd.
Evanston, IL, 60208
;
.
.
'Trimarchi, Giancarlo'
;
Department of Physics and Astronomy
Northwestern University
2145 Sheridan Rd.
Evanston, IL, 60208
;
.
.
'Medvedeva, Julia'
;
Department of Physics
Missouri University of Science & Technology
Rolla, MO 65409
;
.
.
'Hersam, Mark'
;
Department of Meterials Science and Engineering
Northwestern University
2145 Sheridan Rd.
Evanston, IL, 60208
;
.
.
'Richard, Van Duyne'
;
Department of Chemistry
Northwestern University
2145 Sheridan Rd.
Evanston, IL, 60208
;
.
.
'Poeppelmeier, Kenneth'
;
Department of Chemistry
Northwestern University
2145 Sheridan Rd.
Evanston, IL, 60208
;
.
.

_audit_creation_date              2015-04-03
_audit_creation_method
;
Olex2 1.2
(compiled 2015.01.26 svn.r3150 for OlexSys, GUI svn.r4998)
;
_publ_contact_author_address      ?
_publ_contact_author_email        'krp@northwestern.edu'
_publ_contact_author_name         'Kenneth R. Poeppelmeier'
_publ_contact_author_phone        '18474913505'
_publ_requested_journal           'Inorg.Chem.'
_publ_section_references
;
Dolomanov, O. V., Bourhis, L. J., Gildea, R. J., Howard, J. A. K. & Puschmann,
H. (2009). <i>J. Appl. Cryst.</i> <b>42</b>, 339--341.

Sheldrick, G. M. (2008). <i>Acta Cryst.</i> A<b>64</b>, 112--122.
;
_chemical_name_common             ?
_chemical_name_systematic         'Manganese (II) Tantalate'
_chemical_formula_moiety          'Mn3 O8 Ta2'
_chemical_formula_sum             'Mn3 O8 Ta2'
_chemical_formula_weight          654.72
_chemical_melting_point           ?
loop_
  _atom_type_symbol
  _atom_type_description
  _atom_type_scat_dispersion_real
  _atom_type_scat_dispersion_imag
  _atom_type_scat_source
 'O' 'O' 0.0106 0.0060 'International Tables Vol C Tables 4.2.6.8 and 6.1.1.4'
 'Mn' 'Mn' 0.3368 0.7283 'International Tables Vol C Tables 4.2.6.8 and 6.1.1.4'
 'Ta' 'Ta' -0.7052 6.5227
 'International Tables Vol C Tables 4.2.6.8 and 6.1.1.4'

_shelx_space_group_comment
;
The symmetry employed for this shelxl refinement is uniquely defined
by the following loop, which should always be used as a source of
symmetry information in preference to the above space-group names.
They are only intended as comments.
;
_space_group_crystal_system       tetragonal
_space_group_IT_number            88
_space_group_name_H-M_alt         'I 41/a'
_space_group_name_Hall            '-I 4ad'
loop_
  _space_group_symop_operation_xyz
 'x, y, z'
 '-y+3/4, x+1/4, z+1/4'
 '-x, -y+1/2, z'
 'y+1/4, -x+1/4, z+1/4'
 'x+1/2, y+1/2, z+1/2'
 '-y+5/4, x+3/4, z+3/4'
 '-x+1/2, -y+1, z+1/2'
 'y+3/4, -x+3/4, z+3/4'
 '-x, -y, -z'
 'y-3/4, -x-1/4, -z-1/4'
 'x, y-1/2, -z'
 '-y-1/4, x-1/4, -z-1/4'
 '-x+1/2, -y+1/2, -z+1/2'
 'y-1/4, -x+1/4, -z+1/4'
 'x+1/2, y, -z+1/2'
 '-y+1/4, x+1/4, -z+1/4'

_cell_length_a                    11.2133(4)
_cell_length_b                    11.2133(4)
_cell_length_c                    9.7723(3)
_cell_angle_alpha                 90
_cell_angle_beta                  90
_cell_angle_gamma                 90
_cell_volume                      1228.75(10)
_cell_formula_units_Z             8
_cell_measurement_reflns_used     6372
_cell_measurement_temperature     100
_cell_measurement_theta_max       30.040
_cell_measurement_theta_min       2.765
_shelx_estimated_absorpt_T_max    0.035
_shelx_estimated_absorpt_T_min    0.021
_exptl_absorpt_coefficient_mu     41.486
_exptl_absorpt_correction_T_max   0.035
_exptl_absorpt_correction_T_min   0.0042
_exptl_absorpt_correction_type    numerical
_exptl_absorpt_process_details    'Face-indexed absorption correction via XPREP'
_exptl_absorpt_special_details    ?
_exptl_crystal_colour             'metallic dark red'
_exptl_crystal_colour_lustre      metallic
_exptl_crystal_colour_modifier    dark
_exptl_crystal_colour_primary     red
_exptl_crystal_density_diffrn     7.078
_exptl_crystal_density_meas       .
_exptl_crystal_density_method     ?
_exptl_crystal_description        block
_exptl_crystal_F_000              2280
_exptl_crystal_preparation        'Optical floating zone synthesis'
_exptl_crystal_size_max           0.413
_exptl_crystal_size_mid           0.304
_exptl_crystal_size_min           0.247
_exptl_transmission_factor_max    ?
_exptl_transmission_factor_min    ?
_diffrn_reflns_av_R_equivalents   0.1293
_diffrn_reflns_av_unetI/netI      0.0481
_diffrn_reflns_Laue_measured_fraction_full 1.000
_diffrn_reflns_Laue_measured_fraction_max 1.000
_diffrn_reflns_limit_h_max        15
_diffrn_reflns_limit_h_min        -15
_diffrn_reflns_limit_k_max        15
_diffrn_reflns_limit_k_min        -15
_diffrn_reflns_limit_l_max        13
_diffrn_reflns_limit_l_min        -13
_diffrn_reflns_number             7530
_diffrn_reflns_point_group_measured_fraction_full 1.000
_diffrn_reflns_point_group_measured_fraction_max 1.000
_diffrn_reflns_theta_full         25.242
_diffrn_reflns_theta_max          30.040
_diffrn_reflns_theta_min          2.765
_diffrn_ambient_temperature       100
_diffrn_detector_area_resol_mean  ?
_diffrn_measured_fraction_theta_full 1.000
_diffrn_measured_fraction_theta_max 1.000
_diffrn_measurement_device_type   'Bruker Kappa APEXII'
_diffrn_measurement_method        '\f and \w scans'
_diffrn_radiation_monochromator   'graphite'
_diffrn_radiation_type            MoK\a
_diffrn_radiation_wavelength      0.71073
_diffrn_source                    ?
_diffrn_special_details           ?
_diffrn_standards_number          0
_reflns_Friedel_coverage          0.000
_reflns_Friedel_fraction_full     .
_reflns_Friedel_fraction_max      .
_reflns_number_gt                 904
_reflns_number_total              904
_reflns_special_details
;
 Reflections were merged by SHELXL according to the crystal
 class for the calculation of statistics and refinement.
 
 _reflns_Friedel_fraction is defined as the number of unique
 Friedel pairs measured divided by the number that would be
 possible theoretically, ignoring centric projections and
 systematic absences.
;
_reflns_threshold_expression      'I > 2\s(I)'
_computing_cell_refinement        'SAINT v7.68A (Bruker, 2009)'
_computing_data_collection        ?
_computing_data_reduction         'SAINT v7.68A (Bruker, 2009)'
_computing_molecular_graphics     'Olex2 (Dolomanov et al., 2009)'
_computing_publication_material   'Olex2 (Dolomanov et al., 2009)'
_computing_structure_refinement   'ShelXL (Sheldrick, 2008)'
_computing_structure_solution     'ShelXS (Sheldrick, 2008)'
_refine_diff_density_max          6.738
_refine_diff_density_min          -2.270
_refine_diff_density_rms          1.169
_refine_ls_extinction_coef        0.0080(5)
_refine_ls_extinction_expression  'Fc^*^=kFc[1+0.001xFc^2^\l^3^/sin(2\q)]^-1/4^'
_refine_ls_extinction_method      'SHELXL-2014/7 (Sheldrick 2014'
_refine_ls_goodness_of_fit_ref    1.300
_refine_ls_hydrogen_treatment     undef
_refine_ls_matrix_type            full
_refine_ls_number_parameters      60
_refine_ls_number_reflns          904
_refine_ls_number_restraints      0
_refine_ls_R_factor_all           0.0421
_refine_ls_R_factor_gt            0.0421
_refine_ls_restrained_S_all       1.300
_refine_ls_shift/su_max           0.001
_refine_ls_shift/su_mean          0.000
_refine_ls_structure_factor_coef  Fsqd
_refine_ls_weighting_details
'w=1/[\s^2^(Fo^2^)+(0.0486P)^2^+40.3461P] where P=(Fo^2^+2Fc^2^)/3'
_refine_ls_weighting_scheme       calc
_refine_ls_wR_factor_gt           0.1133
_refine_ls_wR_factor_ref          0.1133
_refine_special_details           ?
_olex2_refinement_description
;
;
_atom_sites_solution_hydrogens    .
_atom_sites_solution_primary      direct
_atom_sites_solution_secondary    ?
loop_
  _atom_site_label
  _atom_site_type_symbol
  _atom_site_fract_x
  _atom_site_fract_y
  _atom_site_fract_z
  _atom_site_U_iso_or_equiv
  _atom_site_adp_type
  _atom_site_occupancy
  _atom_site_site_symmetry_order
  _atom_site_calc_flag
  _atom_site_refinement_flags_posn
  _atom_site_refinement_flags_adp
  _atom_site_refinement_flags_occupancy
  _atom_site_disorder_assembly
  _atom_site_disorder_group
 Ta1 Ta 0.07762(4) 0.55617(3) 0.12974(3) 0.0083(3) Uani 1 1 d . . . . .
 Mn3 Mn 0.0000 0.7500 -0.1250 0.0098(6) Uani 1 4 d S T P . .
 Mn1 Mn -0.20209(13) 0.62940(13) 0.1531(2) 0.0128(3) Uani 1 1 d . . . . .
 Mn2 Mn 0.0000 0.7500 0.3750 0.0115(6) Uani 1 4 d S T P . .
 O3 O -0.0589(5) 0.5522(6) 0.2493(6) 0.0110(11) Uani 1 1 d . . . . .
 O4 O 0.1828(5) 0.4632(5) 0.2421(6) 0.0097(10) Uani 1 1 d . . . . .
 O1 O 0.1290(5) 0.7009(6) 0.2098(6) 0.0104(11) Uani 1 1 d . . . . .
 O2 O -0.0371(6) 0.6029(5) -0.0187(7) 0.0111(11) Uani 1 1 d . . . . .

loop_
  _atom_site_aniso_label
  _atom_site_aniso_U_11
  _atom_site_aniso_U_22
  _atom_site_aniso_U_33
  _atom_site_aniso_U_23
  _atom_site_aniso_U_13
  _atom_site_aniso_U_12
 Ta1 0.0089(3) 0.0087(3) 0.0074(3) 0.00026(9) -0.00011(10) 0.00025(9)
 Mn3 0.0103(8) 0.0103(8) 0.0086(13) 0.000 0.000 0.000
 Mn1 0.0131(7) 0.0117(7) 0.0138(6) 0.0028(5) -0.0052(5) -0.0021(5)
 Mn2 0.0123(8) 0.0123(8) 0.0097(13) 0.000 0.000 0.000
 O3 0.007(3) 0.011(3) 0.014(3) 0.002(2) 0.001(2) -0.0001(19)
 O4 0.007(2) 0.014(3) 0.008(3) 0.000(2) -0.002(2) -0.003(2)
 O1 0.008(2) 0.015(3) 0.009(3) 0.001(2) 0.001(2) 0.000(2)
 O2 0.013(3) 0.006(2) 0.014(3) 0.002(2) -0.002(2) -0.001(2)

_geom_special_details
;
 All esds (except the esd in the dihedral angle between two l.s. planes)
 are estimated using the full covariance matrix.  The cell esds are taken
 into account individually in the estimation of esds in distances, angles
 and torsion angles; correlations between esds in cell parameters are only
 used when they are defined by crystal symmetry.  An approximate (isotropic)
 treatment of cell esds is used for estimating esds involving l.s. planes.
;
loop_
  _geom_bond_atom_site_label_1
  _geom_bond_atom_site_label_2
  _geom_bond_distance
  _geom_bond_site_symmetry_2
  _geom_bond_publ_flag
 Ta1 Ta1 3.3236(7) 9_565 ?
 Ta1 Mn1 3.2502(15) . ?
 Ta1 O3 1.926(6) . ?
 Ta1 O4 1.919(6) . ?
 Ta1 O4 2.034(6) 8_454 ?
 Ta1 O1 1.892(7) . ?
 Ta1 O2 2.009(7) . ?
 Ta1 O2 2.136(6) 9_565 ?
 Mn3 O2 1.994(6) . ?
 Mn3 O2 1.994(6) 10_565 ?
 Mn3 O2 1.994(6) 3_565 ?
 Mn3 O2 1.994(6) 12_665 ?
 Mn1 O3 2.000(6) 6_454 ?
 Mn1 O3 2.052(6) . ?
 Mn1 O4 2.488(6) 15_455 ?
 Mn1 O1 2.145(6) 3_565 ?
 Mn1 O1 2.455(6) 15_455 ?
 Mn1 O2 2.516(7) . ?
 Mn2 O1 2.236(6) 12_666 ?
 Mn2 O1 2.236(6) 10_566 ?
 Mn2 O1 2.236(6) . ?
 Mn2 O1 2.236(6) 3_565 ?
 O3 Mn1 2.000(6) 4_455 ?
 O4 Ta1 2.034(6) 2 ?
 O4 Mn1 2.488(6) 15 ?
 O1 Mn1 2.145(6) 3_565 ?
 O1 Mn1 2.455(6) 15 ?
 O2 Ta1 2.136(6) 9_565 ?

loop_
  _geom_angle_atom_site_label_1
  _geom_angle_atom_site_label_2
  _geom_angle_atom_site_label_3
  _geom_angle
  _geom_angle_site_symmetry_1
  _geom_angle_site_symmetry_3
  _geom_angle_publ_flag
 Mn1 Ta1 Ta1 69.14(3) . 9_565 ?
 O3 Ta1 Ta1 92.16(19) . 9_565 ?
 O3 Ta1 Mn1 36.52(18) . . ?
 O3 Ta1 O4 175.3(2) . 8_454 ?
 O3 Ta1 O2 86.3(3) . . ?
 O3 Ta1 O2 96.9(3) . 9_565 ?
 O4 Ta1 Ta1 84.83(17) 8_454 9_565 ?
 O4 Ta1 Ta1 123.53(18) . 9_565 ?
 O4 Ta1 Mn1 138.79(17) 8_454 . ?
 O4 Ta1 Mn1 133.65(17) . . ?
 O4 Ta1 O3 97.4(3) . . ?
 O4 Ta1 O4 87.3(2) . 8_454 ?
 O4 Ta1 O2 88.1(2) . 9_565 ?
 O4 Ta1 O2 82.7(2) 8_454 9_565 ?
 O4 Ta1 O2 161.5(3) . . ?
 O1 Ta1 Ta1 143.15(19) . 9_565 ?
 O1 Ta1 Mn1 92.75(19) . . ?
 O1 Ta1 O3 90.6(3) . . ?
 O1 Ta1 O4 92.4(3) . . ?
 O1 Ta1 O4 89.6(3) . 8_454 ?
 O1 Ta1 O2 105.7(2) . . ?
 O1 Ta1 O2 172.3(3) . 9_565 ?
 O2 Ta1 Ta1 35.40(17) 9_565 9_565 ?
 O2 Ta1 Ta1 38.02(17) . 9_565 ?
 O2 Ta1 Mn1 50.7(2) . . ?
 O2 Ta1 Mn1 92.38(17) 9_565 . ?
 O2 Ta1 O4 89.2(3) . 8_454 ?
 O2 Ta1 O2 73.4(3) . 9_565 ?
 O2 Mn3 O2 117.2(4) 3_565 . ?
 O2 Mn3 O2 105.75(18) 12_665 . ?
 O2 Mn3 O2 105.75(18) 10_565 . ?
 O2 Mn3 O2 105.75(18) 3_565 10_565 ?
 O2 Mn3 O2 117.2(4) 10_565 12_665 ?
 O2 Mn3 O2 105.75(18) 3_565 12_665 ?
 O3 Mn1 Ta1 33.95(17) . . ?
 O3 Mn1 Ta1 125.2(2) 6_454 . ?
 O3 Mn1 O3 158.4(3) 6_454 . ?
 O3 Mn1 O4 84.3(2) . 15_455 ?
 O3 Mn1 O4 106.1(2) 6_454 15_455 ?
 O3 Mn1 O1 87.5(2) . 3_565 ?
 O3 Mn1 O1 82.2(2) 6_454 15_455 ?
 O3 Mn1 O1 119.4(3) . 15_455 ?
 O3 Mn1 O1 95.8(2) 6_454 3_565 ?
 O3 Mn1 O2 87.3(3) 6_454 . ?
 O3 Mn1 O2 71.4(2) . . ?
 O4 Mn1 Ta1 109.89(14) 15_455 . ?
 O4 Mn1 O2 124.6(2) 15_455 . ?
 O1 Mn1 Ta1 149.93(16) 15_455 . ?
 O1 Mn1 Ta1 82.73(17) 3_565 . ?
 O1 Mn1 O4 139.2(2) 3_565 15_455 ?
 O1 Mn1 O4 67.6(2) 15_455 15_455 ?
 O1 Mn1 O1 82.2(2) 3_565 15_455 ?
 O1 Mn1 O2 89.8(2) 3_565 . ?
 O1 Mn1 O2 166.0(2) 15_455 . ?
 O2 Mn1 Ta1 38.16(15) . . ?
 O1 Mn2 O1 121.41(19) 10_566 . ?
 O1 Mn2 O1 121.41(19) 3_565 10_566 ?
 O1 Mn2 O1 87.6(3) 12_666 10_566 ?
 O1 Mn2 O1 121.41(18) 12_666 3_565 ?
 O1 Mn2 O1 87.6(3) 3_565 . ?
 O1 Mn2 O1 121.41(19) 12_666 . ?
 Ta1 O3 Mn1 138.1(3) . 4_455 ?
 Ta1 O3 Mn1 109.5(3) . . ?
 Mn1 O3 Mn1 108.1(3) 4_455 . ?
 Ta1 O4 Ta1 145.3(3) . 2 ?
 Ta1 O4 Mn1 104.8(2) 2 15 ?
 Ta1 O4 Mn1 98.5(2) . 15 ?
 Ta1 O1 Mn1 140.4(3) . 3_565 ?
 Ta1 O1 Mn1 100.4(3) . 15 ?
 Ta1 O1 Mn2 108.2(3) . . ?
 Mn1 O1 Mn1 97.8(2) 3_565 15 ?
 Mn1 O1 Mn2 102.4(3) 3_565 . ?
 Mn2 O1 Mn1 100.7(2) . 15 ?
 Ta1 O2 Ta1 106.6(3) . 9_565 ?
 Ta1 O2 Mn1 106.3(3) 9_565 . ?
 Ta1 O2 Mn1 91.1(3) . . ?
 Mn3 O2 Ta1 118.1(3) . 9_565 ?
 Mn3 O2 Ta1 117.3(3) . . ?
 Mn3 O2 Mn1 113.8(3) . . ?

_shelx_SHELXL_version_number      '2014/7'
_iucr_refine_instructions_details
;

    axmto.res created by SHELXL-2014/7

TITL AXMTO in I41/a #88
REM reset to I41/a #88
CELL 0.71073 11.2133 11.2133 9.7723 90 90 90
ZERR 8 0.0004 0.0004 0.0003 0 0 0
LATT 2
SYMM 0.75-Y,0.25+X,0.25+Z
SYMM -X,0.5-Y,+Z
SYMM 0.25+Y,0.25-X,0.25+Z
SFAC O Mn Ta
UNIT 64 24 16
 
L.S. 4 0 0
PLAN  20
SIZE 0.247 0.304 0.413
TEMP -173.15
BOND
fmap 2 53
ACTA
REM <olex2.extras>
REM <HklSrc "%.\\Abs.hkl">
REM </olex2.extras>
 
WGHT    0.048600   40.346100
EXTI    0.008026
FVAR       0.07411
TA1   3    0.077620    0.556167    0.129735    11.00000    0.00888    0.00872 =
         0.00738    0.00026   -0.00011    0.00025
MN3   2    0.000000    0.750000   -0.125000    10.25000    0.01032    0.01032 =
         0.00862    0.00000    0.00000    0.00000
MN1   2   -0.202091    0.629398    0.153069    11.00000    0.01305    0.01168 =
         0.01376    0.00278   -0.00516   -0.00212
MN2   2    0.000000    0.750000    0.375000    10.25000    0.01231    0.01231 =
         0.00973    0.00000    0.00000    0.00000
O3    1   -0.058890    0.552227    0.249277    11.00000    0.00744    0.01119 =
         0.01428    0.00166    0.00055   -0.00012
O4    1    0.182812    0.463168    0.242067    11.00000    0.00707    0.01378 =
         0.00830    0.00027   -0.00168   -0.00336
O1    1    0.128987    0.700925    0.209787    11.00000    0.00783    0.01463 =
         0.00888    0.00140    0.00084   -0.00022
O2    1   -0.037136    0.602864   -0.018719    11.00000    0.01337    0.00613 =
         0.01383    0.00218   -0.00168   -0.00052
HKLF 4
 
REM  AXMTO in I41/a #88
REM R1 =  0.0421 for     904 Fo > 4sig(Fo)  and  0.0421 for all     904 data
REM     60 parameters refined using      0 restraints
 
END  
     
WGHT      0.0486     40.3505 

REM Highest difference peak  6.738,  deepest hole -2.270,  1-sigma level  1.169
Q1    1   0.1334  0.5255  0.1278  11.00000  0.05    6.74
Q2    1   0.1115  0.5535  0.0944  11.00000  0.05    6.59
Q3    1  -0.1900  0.6648  0.1191  11.00000  0.05    6.04
Q4    1   0.0490  0.5039  0.1305  11.00000  0.05    4.78
Q5    1   0.0950  0.5716  0.1702  11.00000  0.05    4.53
Q6    1   0.0377  0.5889  0.1239  11.00000  0.05    3.42
Q7    1  -0.0527  0.5809  0.0641  11.00000  0.05    1.63
Q8    1  -0.0422  0.5648 -0.0607  11.00000  0.05    1.51
Q9    1   0.0000  0.5000  0.0000  10.50000  0.05    1.48
Q10   1   0.0657  0.4226  0.2025  11.00000  0.05    1.16
Q11   1   0.1338  0.7146  0.2360  11.00000  0.05    1.16
Q12   1  -0.0590  0.5786  0.2038  11.00000  0.05    1.07
Q13   1   0.1445  0.4111  0.2503  11.00000  0.05    1.00
Q14   1   0.0748  0.6489  0.3155  11.00000  0.05    0.93
Q15   1   0.2899  0.4888  0.2851  11.00000  0.05    0.87
Q16   1  -0.0248  0.6184 -0.0461  11.00000  0.05    0.84
Q17   1   0.0927  0.6862  0.2106  11.00000  0.05    0.82
Q18   1   0.0114  0.5124  0.2578  11.00000  0.05    0.77
Q19   1   0.0754  0.6478 -0.0684  11.00000  0.05    0.71
Q20   1  -0.1088  0.6286 -0.1305  11.00000  0.05    0.64

REM The information below was added by Olex2.
REM
REM R1 = 0.0421 for 904 Fo > 4sig(Fo) and 0.0421 for all 7784 data
REM n/a parameters refined using n/a restraints
REM Highest difference peak 6.74, deepest hole -2.27
REM Mean Shift 0, Max Shift 0.001.

REM +++ Tabular Listing of Refinement Information +++
REM R1_all = 0.0421
REM R1_gt = 0.0421
REM wR_ref = 0.1133
REM GOOF = 1.300
REM Shift_max = 0.001
REM Shift_mean = 0
REM Reflections_all = 7784
REM Reflections_gt = 904
REM Parameters = n/a
REM Hole = -2.27
REM Peak = 6.74
REM Flack = n/a

;
_olex2_exptl_crystal_mounting_method 'Paratone oil on glass fiber'
_olex2_submission_special_instructions 'No special instructions were received'
loop_
  _refln_index_h
  _refln_index_k
  _refln_index_l
  _refln_F_squared_meas
  _refln_F_squared_sigma
 0 0 -4 2820.09 13.25
 0 0 -8 2153.49 11.36
 0 0 8 1868.57 6.06
 0 0 -10 0.9 0.36
 0 0 10 1.12 0.29
 0 0 12 906.76 3.78
 -1 0 -1 126.73 1.39
 -1 0 1 67.4 0.72
 -1 0 1 95.8 0.99
 0 -1 -1 83.91 0.63
 0 1 -1 107.16 0.89
 0 1 1 94.76 0.73
 1 0 -1 81.37 0.57
 -1 0 -3 366.82 2.9
 -1 0 3 345.67 2.17
 0 -1 -3 325.93 1.86
 0 -1 -3 248.75 2.22
 0 1 -3 311.52 2.27
 1 0 -3 388.38 2.44
 1 0 -3 383.01 2.51
 1 0 -3 323.14 1.15
 -1 0 -5 11.13 0.69
 -1 0 5 12.8 0.43
 -1 0 5 12.93 0.55
 0 -1 -5 13.08 0.53
 0 -1 -5 12.8 0.7
 0 1 -5 14.03 0.8
 1 0 -5 12.89 0.54
 1 0 -5 11.16 0.6
 -1 0 -7 306.18 2.95
 -1 0 7 276.33 2.43
 -1 0 7 262.04 1.86
 0 -1 -7 245.07 2.48
 0 1 -7 298.45 2.87
 0 1 7 278.52 1.67
 1 0 -7 331.5 2.7
 -1 0 -9 5.3 0.62
 -1 0 9 5.55 0.45
 0 -1 -9 5.69 0.59
 0 -1 9 4.21 0.38
 0 1 -9 6.39 0.63
 0 1 9 7.01 0.51
 1 0 -9 6.61 0.56
 -1 0 -11 232.27 2.63
 -1 0 11 262.45 2.12
 0 -1 11 211.05 1.71
 0 1 -11 270.04 2.78
 0 1 11 237.5 1.97
 1 0 11 213.45 1.54
 -1 0 13 3.39 0.4
 0 -1 13 4.45 0.44
 0 1 -13 4.04 0.54
 0 1 13 3.54 0.44
 1 0 13 3.75 0.43
 -1 -1 0 2.74 0.32
 -1 1 0 3.64 0.22
 1 -1 0 5.57 0.23
 1 1 0 2.51 0.15
 -1 -1 2 190.24 1.28
 -1 1 -2 222.73 1.77
 -1 1 2 226 1.44
 -1 1 2 188.05 1.44
 1 -1 -2 180.14 1.39
 1 -1 -2 222.29 1.34
 1 1 -2 219.26 1.37
 1 1 -2 173.14 1.18
 -1 -1 -4 17.41 0.86
 -1 -1 4 17.81 0.42
 -1 -1 4 14.39 0.45
 -1 1 -4 17.3 0.83
 -1 1 4 19.17 0.69
 1 -1 -4 14.07 0.59
 1 -1 -4 12.7 0.63
 1 1 -4 19.34 0.73
 -1 -1 -6 99.67 1.69
 -1 -1 6 80.16 1.24
 -1 -1 6 73.87 0.94
 -1 1 -6 126.26 1.99
 -1 1 6 120.63 1.45
 1 -1 -6 96.42 1.2
 1 -1 -6 97.71 1.54
 1 1 -6 121.86 1.71
 -1 -1 -8 16.78 0.82
 -1 -1 8 17.93 0.61
 -1 1 -8 24.13 1.02
 -1 1 8 21.57 0.76
 1 1 -8 21.51 0.86
 -1 -1 -10 40.88 1.18
 -1 -1 10 44.25 0.88
 -1 1 -10 51.39 1.35
 -1 1 10 44.89 0.94
 1 1 -10 53.82 1.24
 1 1 10 45.91 0.78
 -1 -1 12 4.26 0.44
 -1 1 -12 4.32 0.59
 -1 1 12 4.13 0.45
 1 -1 12 5.49 0.41
 1 1 -12 4.68 0.55
 1 1 12 4.56 0.45
 -2 1 -1 4.68 0.42
 -2 1 1 3.41 0.4
 -2 1 1 3.38 0.39
 -2 1 1 4.81 0.4
 -1 -2 -1 4.09 0.21
 -1 -2 -1 5.36 0.53
 -1 -2 1 9.36 0.33
 -1 -2 1 4.75 0.46
 1 2 -1 0.03 0.06
 1 2 -1 3.83 0.37
 1 2 -1 4.78 0.26
 1 2 1 2.89 0.33
 1 2 1 4.6 0.22
 2 -1 -1 6.14 0.5
 -2 1 -3 3.99 0.5
 -2 1 3 4.13 0.36
 -2 1 3 2.91 0.45
 -1 -2 -3 5.44 0.34
 -1 -2 3 3.43 0.39
 1 2 -3 11.43 0.57
 1 2 -3 3.27 0.21
 1 2 3 3.3 0.31
 2 -1 -3 3.85 0.44
 2 -1 -3 3.36 0.39
 2 -1 -3 3.33 0.37
 -2 1 -5 95.65 1.88
 -2 1 5 64.93 1.08
 -1 -2 -5 72.89 0.88
 -1 -2 5 83.36 1.31
 -1 -2 5 74.52 0.85
 1 2 -5 81.09 1.38
 2 -1 -5 65.62 1.1
 2 -1 -5 99.52 0.93
 2 -1 -5 77.84 0.98
 -2 1 -7 115.66 2.05
 -2 1 7 100.83 1.55
 -2 1 7 93 1.34
 -1 -2 7 79.39 1.03
 1 2 -7 131.71 1.95
 1 2 7 104.62 0.92
 2 -1 -7 93.15 1.23
 -2 1 -9 152.11 2.33
 -2 1 9 143.33 1.62
 -1 -2 9 130.76 1.4
 1 2 -9 184.43 2.3
 1 2 9 154.35 1.37
 -2 1 -11 6.24 0.7
 -2 1 11 6.63 0.5
 -1 -2 11 5.07 0.45
 1 2 -11 6.96 0.66
 1 2 11 5.78 0.43
 -2 1 -13 96.91 1.86
 -2 1 13 87.29 1.35
 -1 -2 13 93.2 1.34
 1 2 13 82.06 1.17
 -2 0 0 53.05 0.81
 0 -2 0 32.5 0.53
 0 2 0 38.82 0.62
 0 2 0 42.25 0.47
 2 0 0 37.19 0.37
 -2 0 -2 4.43 0.65
 -2 0 2 2.36 0.34
 -2 0 2 3.19 0.39
 -2 0 2 2.41 0.45
 0 -2 -2 4.06 0.31
 0 -2 -2 2.84 0.34
 0 2 -2 4 0.43
 0 2 2 2.43 0.27
 2 0 -2 3.23 0.42
 2 0 -2 3.29 0.3
 2 0 -2 1.33 0.22
 2 0 -2 2.68 0.3
 -2 0 -4 1.66 0.5
 -2 0 4 1.22 0.36
 -2 0 4 1.72 0.45
 0 -2 -4 1.82 0.3
 0 2 -4 1.97 0.42
 0 2 4 1.04 0.27
 2 0 -4 2.4 0.39
 2 0 -4 5.17 0.48
 2 0 -4 1.7 0.25
 2 0 -4 0.96 0.34
 -2 0 -6 3.14 0.56
 -2 0 6 2.63 0.42
 -2 0 6 2.65 0.49
 0 -2 -6 2.35 0.29
 0 2 -6 3.12 0.52
 0 2 6 3 0.33
 0 2 6 2.44 0.32
 2 0 -6 3.12 0.4
 2 0 -6 3.22 0.4
 -2 0 -8 1.34 0.48
 -2 0 8 2.48 0.41
 -2 0 8 5.93 0.58
 0 2 -8 2.09 0.51
 0 2 8 1.66 0.32
 2 0 -8 2.25 0.4
 -2 0 -10 37.55 1.19
 -2 0 10 39.72 0.93
 0 -2 10 28.05 0.67
 0 2 -10 45.51 1.28
 0 2 10 31.27 0.75
 -2 0 -12 19.58 0.96
 -2 0 12 16.96 0.65
 0 -2 12 16.95 0.59
 0 2 -12 20.21 0.89
 0 2 12 14.95 0.6
 -2 -1 -1 785.18 3.43
 -2 -1 1 1027.68 3.53
 -2 -1 1 869.25 2.66
 -2 -1 1 862.71 3.93
 -1 2 -1 1046.99 3.68
 -1 2 1 615.21 2.45
 -1 2 1 746.14 2.52
 1 -2 -1 893.75 3
 1 -2 -1 586.88 2.3
 2 1 -1 799.89 3.63
 2 1 -1 876.18 2.42
 -2 -1 3 634.69 3.36
 -2 -1 3 654.79 3.38
 -1 2 -3 645.36 3.55
 -1 2 3 692.93 3.09
 -1 2 3 600.65 2.77
 1 -2 -3 552.7 2.81
 1 -2 -3 776.14 2.86
 2 1 -3 677.31 3.44
 2 1 -3 638.81 2.61
 2 1 -3 478.76 2.13
 -2 -1 -5 691.83 4.59
 -2 -1 5 603.74 3.35
 -2 -1 5 892.56 3.8
 -1 2 5 514.67 2.63
 1 -2 -5 758.11 3.8
 2 1 -5 890.82 4.06
 2 1 -5 951 4.08
 -2 -1 -7 888.16 5.15
 -2 -1 7 706.01 3.8
 -2 -1 7 772.38 3.37
 -1 2 -7 1084.96 6.21
 -1 2 7 530.61 2.8
 1 -2 -7 744.28 3.25
 2 1 -7 921.04 4.37
 -2 -1 -9 653.22 4.44
 -2 -1 9 651.88 3.29
 -1 2 -9 757.05 5.05
 -1 2 9 503.37 2.79
 2 1 -9 759.49 4.08
 -2 -1 11 547.08 3.17
 -1 2 -11 719.16 4.85
 -1 2 11 444.26 2.75
 1 -2 11 431.62 2.15
 2 1 11 587.43 2.36
 -2 -1 13 464.38 2.9
 -1 2 -13 585.34 4.21
 -1 2 13 392.19 2.68
 1 -2 13 433.72 2.46
 2 1 13 503.22 2.63
 -2 -2 0 436.61 2.06
 -2 -2 0 187.34 1.53
 -2 2 0 405.19 1.96
 2 2 0 226.23 1.98
 2 2 0 441.97 1.67
 -2 -2 -2 2.12 0.2
 -2 -2 2 1.72 0.3
 -2 -2 2 2.49 0.28
 -2 -2 2 1.36 0.37
 -2 2 -2 0.77 0.38
 -2 2 2 0.99 0.25
 -2 2 2 1.96 0.31
 2 -2 -2 0.93 0.27
 2 -2 -2 3.03 0.36
 2 2 -2 1.73 0.24
 2 2 -2 3.43 0.27
 2 2 -2 0.64 0.29
 2 2 -2 2 0.26
 2 2 2 2.06 0.32
 2 2 2 1.96 0.23
 -2 -2 -4 243.39 1.21
 -2 -2 -4 241.59 2.93
 -2 -2 4 257.98 2.26
 -2 -2 4 200.12 1.79
 -2 2 -4 246.43 2.58
 -2 2 4 234.77 1.99
 -2 2 4 249.64 2.16
 2 -2 -4 238.67 2.19
 2 -2 -4 274.43 1.93
 2 2 -4 266.5 2.03
 2 2 -4 274 1.52
 2 2 -4 230.89 1.49
 -2 -2 -6 1.58 0.5
 -2 -2 6 1.85 0.35
 -2 -2 6 1.63 0.35
 -2 2 -6 2.45 0.57
 -2 2 6 1.63 0.35
 2 -2 -6 1.39 0.33
 2 2 -6 1.33 0.41
 -2 -2 8 198.44 1.84
 -2 2 -8 241.15 3.02
 -2 2 8 141.21 1.6
 2 -2 -8 178.47 1.68
 2 2 -8 209.03 2.27
 -2 -2 10 1.56 0.33
 -2 2 -10 1.71 0.51
 -2 2 10 1.42 0.34
 2 2 -10 2.22 0.44
 2 2 10 1.83 0.3
 -2 -2 12 94.54 1.38
 -2 2 -12 106.86 2
 -2 2 12 77.33 1.26
 2 2 12 80.23 1.06
 -3 2 -1 7.48 0.43
 -3 2 -1 9 0.63
 -3 2 1 8.92 0.53
 -3 2 1 7.74 0.34
 -2 -3 -1 7.2 0.34
 -2 -3 -1 4.4 0.49
 -2 -3 1 8.18 0.52
 -2 -3 1 4.67 0.49
 2 3 -1 4.72 0.56
 2 3 -1 7.42 0.36
 2 3 1 7.47 0.7
 2 3 1 6.47 0.29
 3 -2 -1 15.33 0.57
 3 -2 -1 7.47 0.54
 -3 2 -3 140.27 1.95
 -3 2 3 127.8 1.49
 -3 2 3 159.06 1.71
 -2 -3 -3 137.39 1.11
 -2 -3 3 128.55 1.49
 -2 -3 3 155.15 1.44
 -2 -3 3 116.3 1.53
 2 3 -3 156.44 1.42
 2 3 -3 156.21 1.29
 2 3 -3 117.39 1.41
 2 3 3 126.54 0.99
 3 -2 -3 124.55 1.64
 3 -2 -3 154.14 1.59
 -3 2 -5 68.1 1.6
 -3 2 5 54.57 1.01
 -3 2 5 64.33 1.2
 -2 -3 -5 76.37 0.95
 -2 -3 5 62.53 1.23
 -2 -3 5 55.32 1.08
 2 3 -5 75.45 1.27
 2 3 5 63.56 0.74
 3 -2 -5 70.8 1.39
 3 -2 -5 81.15 1.16
 -3 2 -7 6.48 0.8
 -3 2 7 3.03 0.41
 -2 -3 7 6.35 0.6
 -2 -3 7 3.64 0.44
 2 3 -7 4.46 0.56
 2 3 7 3.33 0.35
 3 -2 -7 4.97 0.46
 -3 2 -9 178.24 2.72
 -3 2 9 144.78 1.92
 -3 2 9 108.55 1.47
 -2 -3 9 133.12 1.58
 2 3 -9 160.76 2.03
 2 3 9 107.38 1.11
 3 -2 -9 124.33 1.44
 -3 2 -11 76.15 1.78
 -3 2 11 54.83 1.09
 -2 -3 11 65.46 1.1
 2 3 11 47.87 0.85
 -3 2 -13 115.34 2.12
 -3 2 13 88.45 1.39
 -2 -3 13 97.2 1.39
 2 3 13 85.35 1.19
 -3 1 0 20.45 0.6
 1 3 0 13.37 0.57
 -3 1 -2 3455.38 18.69
 -3 1 2 3020.74 13.86
 -3 1 2 2880.22 14.18
 -3 1 2 3692.26 17.8
 -1 -3 -2 3551.96 13.1
 -1 -3 -2 2619.34 12.45
 -1 -3 2 3761.47 15.99
 -1 -3 2 4307.02 14.05
 -1 -3 2 3574.95 16.06
 1 3 -2 4341.92 14.48
 1 3 -2 3230.66 13.63
 1 3 2 3252.43 14.69
 1 3 2 3398.82 12.75
 3 -1 -2 2915.71 15.42
 3 -1 -2 3230.28 13.94
 -3 1 4 10.23 0.58
 -3 1 4 6.37 0.51
 3 -1 -4 8.97 0.51
 -3 1 -6 3080.33 18.1
 -3 1 6 2445.54 11.6
 -3 1 6 1417.43 6.62
 -1 -3 -6 2305.29 8.54
 -1 -3 6 2278 6.99
 -1 -3 6 2244.14 9.8
 1 3 -6 2118.86 7.38
 1 3 6 1592.67 6.21
 3 -1 -6 1725.85 9.26
 3 -1 -6 3864.66 13.93
 3 -1 -6 2248.66 10.57
 -3 1 -8 1.52 0.53
 -3 1 8 1.08 0.38
 -3 1 8 0.95 0.35
 -1 -3 8 2.59 0.37
 1 3 -8 5.41 0.67
 1 3 8 1.3 0.3
 3 -1 -8 2.43 0.33
 -3 1 -10 1279.23 6.79
 -3 1 10 984.07 4.34
 -1 -3 10 1116.52 4.25
 1 3 -10 1265.56 5.93
 1 3 10 835.38 3.42
 -3 1 -12 6.12 0.74
 -3 1 12 4.82 0.5
 -1 -3 12 5.49 0.46
 1 3 12 4.23 0.44
 -3 0 -1 771.05 4.54
 -3 0 1 505.4 2.77
 -3 0 1 571.68 1.39
 -3 0 1 588.75 2.44
 -3 0 1 470.73 2.55
 0 -3 -1 419.61 1.83
 0 -3 -1 424.63 2.21
 0 -3 1 481.68 2.12
 0 3 -1 473.41 1.71
 0 3 -1 456.72 2.05
 0 3 1 512.55 2.68
 0 3 1 452.46 1.7
 3 0 -1 496.32 3.29
 3 0 -1 624.19 2.4
 -3 0 -3 161.29 2.34
 -3 0 3 92.27 1.35
 -3 0 3 89.81 1.2
 -3 0 3 88.09 1.29
 0 -3 -3 121.84 1.22
 0 -3 -3 76.56 0.89
 0 -3 3 107.53 0.73
 0 3 -3 152.81 1.76
 0 3 3 98.66 1.01
 3 0 -3 107.92 1.47
 3 0 -3 94.89 1.05
 -3 0 -5 703.46 4.95
 -3 0 5 471.86 3.29
 -3 0 5 868.86 4.22
 -3 0 5 645.35 3.7
 0 -3 -5 713.99 3.49
 0 3 -5 761.86 4.44
 0 3 5 619.2 2.96
 3 0 -5 621.89 3.44
 3 0 -5 646.36 3.09
 3 0 -5 810.07 3.18
 3 0 -5 782.79 3.7
 -3 0 -7 143.91 2.31
 -3 0 7 143.82 1.87
 -3 0 7 164.94 1.94
 0 -3 -7 139.69 1.43
 0 3 -7 147.36 2.22
 0 3 7 98.02 1.24
 3 0 -7 154.6 1.69
 3 0 -7 156.29 1.69
 -3 0 -9 472.23 4.02
 -3 0 9 425.97 2.96
 0 -3 9 366.2 1.96
 0 3 -9 582.61 4.43
 0 3 9 257 1.99
 -3 0 -11 11.61 0.82
 -3 0 11 10.31 0.57
 0 -3 11 9.32 0.53
 0 3 -11 11.89 0.79
 0 3 11 9.1 0.51
 -3 0 -13 283.42 3.14
 -3 0 13 221.17 2.08
 0 -3 13 237.88 1.95
 0 3 13 234.99 2.06
 -3 -1 0 0.87 0.25
 -1 3 0 1.32 0.26
 -1 3 0 1.62 0.21
 1 -3 0 0.77 0.17
 1 -3 0 0.97 0.29
 3 1 0 1.31 0.2
 -3 -1 -2 80.41 1.64
 -3 -1 2 71.47 1.21
 -3 -1 2 79.42 1.11
 -3 -1 2 63.67 1.25
 -1 3 -2 87.61 1.38
 -1 3 2 62.25 1.03
 -1 3 2 66.86 0.89
 1 -3 -2 68.96 0.93
 1 -3 -2 63.71 0.94
 3 1 -2 61.96 1.23
 3 1 -2 60.25 0.47
 3 1 -2 74 0.92
 -3 -1 -4 4.18 0.69
 -3 -1 4 2.58 0.36
 -3 -1 4 3.75 0.41
 -3 -1 4 2.86 0.51
 -1 3 -4 2.63 0.45
 -1 3 4 4.75 0.45
 -1 3 4 2.86 0.36
 1 -3 -4 2.53 0.35
 1 -3 -4 3.34 0.37
 3 1 -4 3.01 0.44
 3 1 -4 3.53 0.37
 3 1 -4 2.3 0.27
 3 1 -4 2.38 0.41
 -3 -1 -6 25.65 1.05
 -3 -1 6 21.76 0.76
 -3 -1 6 28.34 0.91
 -1 3 -6 31.75 1.14
 -1 3 6 26.76 0.8
 1 -3 -6 32.17 0.91
 3 1 -6 34.07 0.94
 3 1 -6 29.88 0.76
 3 1 -6 44.36 0.54
 -3 -1 -8 24.37 1.04
 -3 -1 8 18.09 0.72
 -3 -1 8 27.68 0.86
 -1 3 -8 28.82 1.22
 -1 3 8 17.89 0.67
 1 -3 -8 22.32 0.65
 3 1 -8 26.56 0.78
 -3 -1 -10 11.78 0.82
 -3 -1 10 13.19 0.65
 -1 3 -10 16.1 0.97
 -1 3 10 10.12 0.54
 -3 -1 12 51.14 1.04
 -1 3 -12 59.54 1.47
 -1 3 12 44.86 0.97
 1 -3 12 42.24 0.83
 -3 -2 -1 164.26 1.19
 -3 -2 1 180.39 1.76
 -3 -2 1 124.78 1.57
 -2 3 1 106.7 1.18
 -2 3 1 151.34 1.08
 2 -3 -1 184.09 1.51
 2 -3 -1 123.63 1.33
 3 2 -1 183.44 2.24
 3 2 -1 179.83 1.29
 3 2 1 161.69 0.89
 -3 -2 -3 259.05 1.14
 -3 -2 3 250.59 2.34
 -3 -2 3 277.32 2.14
 -3 -2 3 219.17 1.95
 -2 3 -3 232.38 2.39
 -2 3 3 182.51 1.86
 -2 3 3 172.62 1.51
 2 -3 -3 220.56 2
 2 -3 -3 217.49 1.79
 3 2 -3 291.66 1.72
 3 2 -3 277.63 1.95
 3 2 -3 201.7 1.93
 3 2 -3 221 1.59
 -3 -2 -5 16.54 1.02
 -3 -2 5 13.56 0.72
 -3 -2 5 12.52 0.57
 -3 -2 5 12.89 0.6
 -2 3 -5 14.53 0.87
 -2 3 5 15.59 0.7
 -2 3 5 15.67 0.7
 2 -3 -5 14.99 0.69
 2 -3 -5 15.57 0.59
 3 2 -5 14.54 0.6
 3 2 -5 13.44 0.43
 3 2 -5 12.23 0.43
 -3 -2 -7 350.26 3.51
 -3 -2 7 346.23 2.86
 -3 -2 7 381.56 2.51
 -2 3 -7 371.7 3.79
 -2 3 7 302.29 2.41
 2 -3 -7 390.34 2.98
 3 2 -7 460.1 3.02
 -3 -2 9 3.48 0.43
 -2 3 -9 8.2 0.87
 -2 3 9 3 0.4
 2 -3 -9 3.73 0.38
 3 2 -9 4.52 0.52
 -3 -2 11 177.77 1.88
 -2 3 -11 250.52 3.16
 -2 3 11 166.24 1.81
 3 2 11 215.43 1.43
 -3 -2 13 7.74 0.53
 -2 3 -13 10.32 0.76
 -2 3 13 9.24 0.58
 3 2 13 8.02 0.44
 -3 -3 0 1.74 0.27
 -3 -3 0 1.37 0.35
 -3 3 0 3.58 0.41
 3 3 0 2.61 0.42
 3 3 0 2.19 0.26
 -3 -3 -2 53.91 0.7
 -3 -3 2 71.98 1.29
 -3 -3 2 68.75 1.03
 -3 -3 2 64.2 1.19
 -3 3 -2 61.26 0.72
 -3 3 -2 71.75 1.37
 -3 3 2 49.93 0.96
 -3 3 2 57.95 0.94
 3 -3 -2 60.03 1.11
 3 -3 -2 54.67 1.05
 3 3 -2 41.44 0.97
 3 3 -2 63.36 0.88
 3 3 2 55.45 0.6
 -3 -3 -4 20.02 0.44
 -3 -3 4 17.18 0.67
 -3 -3 4 20.72 0.72
 -3 -3 4 22.67 0.79
 -3 3 -4 22.5 0.96
 -3 3 4 16.11 0.59
 -3 3 4 21.19 0.69
 3 -3 -4 19.72 0.73
 3 -3 -4 22.62 0.72
 3 -3 -4 25.04 0.73
 3 3 -4 21.26 0.61
 3 3 -4 22.74 0.64
 3 3 -4 14.99 0.55
 3 3 4 18.76 0.46
 3 3 4 18.49 0.38
 -3 -3 6 69.45 1.44
 -3 -3 6 73.64 1.23
 -3 3 -6 66.46 1.66
 -3 3 6 82.12 1.44
 3 -3 -6 77.42 1.5
 3 -3 -6 99.59 1.31
 3 3 -6 63.81 1.17
 -3 -3 8 2.1 0.41
 -3 -3 8 1.7 0.36
 -3 3 -8 1.38 0.57
 -3 3 8 1.23 0.36
 3 -3 -8 2.19 0.38
 3 3 -8 2.14 0.42
 -3 -3 10 79.7 1.21
 -3 3 -10 98.95 2.13
 -3 3 10 66.11 1.21
 3 -3 -10 75.05 1.09
 3 3 10 61.91 0.82
 -3 -3 12 8.93 0.54
 -3 3 -12 12.74 0.9
 -3 3 12 9.85 0.58
 3 3 12 8.09 0.46
 -4 3 -1 303.28 2.31
 -4 3 -1 495.96 3.42
 -4 3 1 377.12 2.59
 -4 3 1 375.79 1.79
 -3 -4 -1 345.89 2.12
 -3 -4 -1 276.79 1.87
 -3 -4 1 460.04 2.86
 -3 -4 1 424.13 2.84
 3 4 -1 267.56 2.46
 3 4 -1 444.18 2.29
 3 4 1 323.25 2.77
 3 4 1 431.06 2.03
 4 -3 -1 380.4 2.74
 4 -3 1 512.11 2.53
 -4 3 -3 725.59 4.68
 -4 3 3 884.72 4.31
 -4 3 3 524.27 2.8
 -4 3 3 571.55 2.93
 -3 -4 -3 646.51 2.56
 -3 -4 3 779.37 4.12
 -3 -4 3 723.56 3.36
 -3 -4 3 680.15 3.67
 3 4 -3 709.86 2.99
 3 4 -3 737.49 2.74
 3 4 3 627.17 2.7
 4 -3 -3 508.48 3.39
 4 -3 -3 649.49 3.31
 -4 3 -5 577.74 4.67
 -4 3 5 557.43 3.24
 -4 3 5 772.24 4
 -3 -4 -5 546.48 2.34
 -3 -4 5 541.75 3.4
 -3 -4 5 578.76 3.42
 3 4 -5 595.92 3.05
 3 4 -5 431.82 1.89
 3 4 -5 755.13 3.53
 3 4 5 426.15 1.93
 4 -3 -5 600.82 4.02
 4 -3 -5 828.81 4.07
 4 -3 -5 827.4 3.51
 -4 3 -7 594.56 5.18
 -4 3 7 526.83 3.4
 -3 -4 7 559.49 3.76
 -3 -4 7 577.7 3.41
 3 4 -7 537.02 3.34
 3 4 7 576.2 2.61
 4 -3 -7 600.43 4.05
 4 -3 -7 1043.82 4.08
 -4 3 -9 621.65 5.32
 -4 3 9 455.86 3.43
 -4 3 9 441.81 3.09
 -3 -4 9 522.75 3.27
 3 4 9 467.51 2.66
 4 -3 -9 489.15 3.22
 -4 3 -11 688.7 5.53
 -4 3 11 503.63 3.27
 -3 -4 11 526.88 3.1
 3 4 11 513.7 2.83
 -4 3 -13 443.2 4.24
 -4 3 13 335.76 2.7
 -3 -4 13 332.83 2.53
 3 4 13 311.85 2.28
 -4 2 0 341.92 2.58
 -4 2 0 443.1 2.77
 -4 2 0 436.66 1.74
 -2 -4 0 390.33 2.36
 -2 -4 0 232.27 2.11
 2 4 0 285.1 2.48
 2 4 0 418.22 2.01
 4 -2 0 322.85 2.24
 4 -2 0 494.11 2.37
 -4 2 -2 171.92 2.1
 -4 2 2 165.38 1.71
 -4 2 2 174.3 1.57
 -2 -4 -2 201.72 1.46
 -2 -4 2 230.59 2.17
 -2 -4 2 196.82 2.01
 2 4 -2 237.47 1.66
 2 4 -2 175.09 1.87
 2 4 -2 235.39 1.52
 2 4 2 195.53 2.03
 2 4 2 176.24 1.23
 4 -2 -2 167.79 1.89
 4 -2 -2 178.79 1.7
 -4 2 4 650.04 4.54
 -4 2 4 682.93 3.78
 -4 2 4 605.25 3.72
 -2 -4 -4 555.49 2.53
 -2 -4 4 497.86 3.06
 -2 -4 4 503.67 3.15
 2 4 -4 570.4 3.02
 2 4 -4 519.02 2.17
 2 4 -4 600.45 2.61
 2 4 4 377.75 1.95
 2 4 4 435.35 2.1
 4 -2 -4 495.33 3.58
 4 -2 -4 570.11 2.84
 -4 2 -6 35.38 1.36
 -4 2 6 30.37 0.98
 -4 2 6 26.77 0.84
 -2 -4 -6 29.57 0.67
 -2 -4 6 21.61 0.75
 -2 -4 6 24.31 0.82
 2 4 -6 28.08 0.86
 2 4 6 30.06 0.71
 4 -2 -6 27.39 0.92
 4 -2 -6 41.56 0.91
 -4 2 -8 267.3 3.41
 -4 2 8 282.15 2.77
 -4 2 8 203.31 2.07
 -2 -4 8 194.31 1.96
 2 4 -8 274.1 2.67
 2 4 8 267.18 2.07
 4 -2 -8 236.99 2.24
 -4 2 -10 33.06 1.35
 -4 2 10 22.54 0.78
 -2 -4 10 24.22 0.79
 2 4 -10 28.57 0.96
 2 4 10 25.3 0.74
 4 -2 -10 28.09 0.75
 -4 2 -12 216.85 2.98
 -4 2 12 164.09 1.88
 -2 -4 12 179.83 1.83
 2 4 12 159.94 1.68
 -4 1 -1 212.84 1.44
 -4 1 -1 173.8 1.88
 -4 1 1 159.96 1.89
 -4 1 1 206.09 1.4
 -4 1 1 203.07 1.66
 -4 1 1 170.08 1.38
 -4 1 1 177.25 1.41
 -1 -4 -1 152.42 1.28
 -1 -4 -1 97.83 1.22
 -1 -4 1 152.01 1.52
 -1 -4 1 134.7 1.52
 1 4 -1 157.16 1.62
 1 4 -1 161.77 1.2
 1 4 1 139.59 1.62
 1 4 1 161.2 1.17
 4 -1 -1 126.1 1.58
 4 -1 -1 216.93 1.68
 -4 1 -3 279.82 3.06
 -4 1 3 211.15 2.24
 -4 1 3 229 2.01
 -4 1 3 337.43 2.78
 -1 -4 -3 310.24 1.93
 -1 -4 -3 155.18 1.48
 -1 -4 3 358.94 2.64
 -1 -4 3 364.53 2.52
 1 4 -3 285.5 2.21
 1 4 -3 313.14 1.55
 1 4 -3 242.97 1.47
 1 4 3 230.76 2.03
 1 4 3 255.66 1.69
 4 -1 -3 260.26 2.58
 4 -1 -3 203.49 1.71
 -4 1 -5 542.73 4.76
 -4 1 5 452.22 3.58
 -4 1 5 432.34 2.99
 -4 1 5 243.45 2.21
 -1 -4 -5 342.09 2.15
 -1 -4 5 384.09 2.58
 -1 -4 5 390.41 2.38
 1 4 -5 404.52 2.91
 1 4 5 330.84 1.97
 4 -1 -5 351.1 2.82
 4 -1 -5 456.59 2.61
 4 -1 -5 431.43 2.2
 -4 1 -7 12.69 0.91
 -4 1 7 11.93 0.68
 -4 1 7 6.96 0.57
 -1 -4 -7 12.08 0.57
 -1 -4 7 11.21 0.53
 1 4 -7 8.83 0.67
 1 4 7 12.92 0.63
 4 -1 -7 8.57 0.53
 4 -1 -7 22.28 0.6
 4 -1 -7 8.64 0.33
 -4 1 -9 356.9 3.8
 -4 1 9 328.33 2.98
 -4 1 9 230.25 2.18
 -1 -4 9 237.23 2.08
 1 4 -9 298.24 3.04
 1 4 9 277.56 2.25
 4 -1 -9 304.42 2.31
 -4 1 -11 31.31 1.2
 -4 1 11 23.86 0.8
 -1 -4 11 25.92 0.79
 1 4 -11 27.09 0.97
 1 4 11 28.39 0.79
 -4 1 -13 218 2.9
 -4 1 13 208.64 2.14
 -1 -4 13 229.81 2.03
 1 4 13 191.6 1.88
 -4 0 0 27.34 0.73
 -4 0 0 28.3 0.8
 0 -4 0 17.89 0.63
 0 4 0 18.78 0.62
 0 4 0 27 0.54
 4 0 0 22.58 0.89
 -4 0 -2 83.95 1.83
 -4 0 2 63.3 1.14
 -4 0 2 58.43 1.2
 0 -4 -2 57.58 0.84
 0 -4 -2 -0.11 0.08
 0 -4 -2 42.3 0.86
 0 -4 2 58.2 0.94
 0 -4 2 55.57 0.87
 0 4 -2 71.56 0.73
 0 4 -2 49.14 0.69
 0 4 2 58.77 1.1
 0 4 2 53.16 0.76
 4 0 -2 49.16 1.11
 4 0 -2 61.49 0.98
 -4 0 -4 15.5 1
 -4 0 4 8.18 0.55
 -4 0 4 14.01 0.59
 -4 0 4 8.98 0.61
 0 -4 -4 10.79 0.48
 0 -4 -4 8.16 0.4
 0 -4 4 14.78 0.62
 0 -4 4 13.71 0.46
 0 4 -4 15.42 0.71
 0 4 4 11.5 0.56
 0 4 4 8.36 0.41
 4 0 -4 8.2 0.52
 4 0 -4 10.07 0.46
 4 0 -4 9.32 0.45
 -4 0 -6 121.91 2.24
 -4 0 6 91.73 1.54
 -4 0 6 79.76 1.37
 0 -4 -6 96.15 1.32
 0 -4 6 84.08 1.2
 0 4 -6 106.33 1.76
 0 4 6 115.14 1.42
 4 0 -6 77.44 1.27
 4 0 -6 126.13 1.26
 4 0 -6 81.63 1.05
 -4 0 -8 5.09 0.66
 -4 0 8 4.24 0.46
 -4 0 8 3.41 0.45
 0 -4 -8 4.32 0.39
 0 -4 8 5.04 0.39
 0 4 -8 6.47 0.62
 0 4 8 4.85 0.54
 4 0 -8 4.42 0.44
 -4 0 -10 10.03 0.78
 -4 0 10 7.55 0.55
 0 -4 10 8.6 0.51
 0 4 -10 11.19 0.81
 0 4 10 8.67 0.55
 -4 0 -12 1.78 0.51
 -4 0 12 1.05 0.34
 0 -4 12 3.57 0.41
 0 4 -12 0.72 0.43
 0 4 12 1.57 0.34
 -4 -1 -1 74.29 0.85
 -4 -1 -1 69.92 1.26
 -4 -1 1 74.33 1.18
 -4 -1 1 63.98 0.89
 -4 -1 1 62.33 1.22
 -1 4 -1 51.54 0.78
 -1 4 1 62.91 1.06
 -1 4 1 70.69 0.81
 1 -4 -1 68.57 0.92
 1 -4 -1 65.66 1.06
 1 -4 1 59.59 0.81
 1 -4 1 64.83 0.93
 4 1 -1 86.35 1.68
 4 1 -1 61.61 0.84
 4 1 1 61.23 0.53
 -4 -1 -3 156.08 2.67
 -4 -1 3 104.45 1.65
 -4 -1 3 103.98 1.53
 -4 -1 3 84.55 1.41
 -1 4 -3 124.58 1.73
 -1 4 3 111.71 1.6
 -1 4 3 105.36 1.26
 1 -4 -3 112.58 1.32
 1 -4 -3 122.39 1.48
 1 -4 -3 109.95 1.31
 4 1 -3 108.45 1.7
 4 1 -3 101.59 1.24
 -4 -1 -5 253.42 3.2
 -4 -1 5 186.65 2.1
 -4 -1 5 210.59 1.98
 -4 -1 5 261.02 2.67
 -1 4 -5 217.33 2.51
 -1 4 5 245.14 2.3
 -1 4 5 214.41 1.78
 1 -4 -5 175.88 1.78
 1 -4 -5 222.88 1.57
 4 1 -5 218.89 2.23
 4 1 -5 248.3 1.65
 4 1 -5 217.25 1.66
 4 1 -5 193.38 1.86
 -4 -1 -7 38.32 1.32
 -4 -1 7 32.02 0.95
 -4 -1 7 52.69 1.25
 -1 4 -7 47.54 1.38
 -1 4 7 48.3 1.07
 1 -4 -7 49.31 1.1
 4 1 -7 49.7 1.09
 4 1 -7 41.24 0.83
 4 1 -7 68.56 0.69
 4 1 -7 48.11 0.53
 -4 -1 -9 95.18 1.91
 -4 -1 9 83.98 1.48
 -4 -1 9 99.32 1.47
 -1 4 -9 130.66 2.32
 -1 4 9 107.65 1.51
 1 -4 -9 97.27 1.2
 -4 -1 -11 37.1 1.28
 -4 -1 11 27.97 0.82
 -1 4 -11 35.35 1.23
 -1 4 11 27.75 0.82
 1 -4 11 29.21 0.69
 -4 -1 13 40.13 0.95
 -1 4 -13 52.04 1.36
 -1 4 13 45.34 1.01
 1 -4 13 41.96 0.89
 -4 -2 0 2823.39 14.52
 -4 -2 0 2063.89 8.24
 -2 4 0 3067.11 9.88
 2 -4 0 2444.46 10.53
 2 -4 0 1949.2 9.53
 4 2 0 2433.8 10.67
 4 2 0 2706.53 11.8
 -4 -2 -2 20.71 0.41
 -4 -2 2 22.24 0.75
 -4 -2 2 22 0.64
 -4 -2 2 19.26 0.8
 -2 4 -2 27.6 0.95
 -2 4 2 20.84 0.72
 -2 4 2 25.71 0.62
 2 -4 -2 25.49 0.69
 2 -4 -2 20.26 0.7
 4 2 -2 23.67 0.94
 4 2 -2 28.75 0.68
 4 2 2 21.65 0.31
 4 2 2 20.46 0.45
 -4 -2 -4 3583.9 12.52
 -4 -2 4 2556.36 11.3
 -4 -2 4 3555.45 13.96
 -4 -2 4 2770.65 14.9
 -2 4 -4 3635.82 16.97
 -2 4 4 2546.34 11.98
 -2 4 4 2432.56 11.45
 2 -4 -4 2603.26 10.57
 2 -4 -4 3987.43 17.21
 4 2 -4 3315.77 17.79
 4 2 -4 3199.63 10.66
 4 2 -4 2882.41 9.83
 4 2 -4 2922.75 16.84
 4 2 -4 2431.16 8.06
 -4 -2 -6 6.48 0.8
 -4 -2 6 5.26 0.51
 -4 -2 6 4.7 0.5
 -2 4 -6 6.02 0.74
 -2 4 6 6.11 0.53
 2 -4 -6 5.76 0.51
 2 -4 -6 8.17 0.45
 4 2 -6 6.39 0.47
 4 2 -6 5.43 0.33
 4 2 -6 4.84 0.34
 -4 -2 -8 1396.41 7.13
 -4 -2 8 1217.35 5.58
 -4 -2 8 1382.55 7.35
 -2 4 -8 1334.29 7.39
 -2 4 8 1257 5.15
 2 -4 -8 1581.75 5.93
 -4 -2 10 1.82 0.37
 -2 4 -10 3.74 0.68
 -2 4 10 3.02 0.41
 -4 -2 12 682.3 3.68
 -2 4 -12 879.96 5.65
 -2 4 12 627.66 3.57
 -4 -3 -1 369.12 2.16
 -4 -3 1 401.07 2.91
 -4 -3 1 194.01 1.88
 -3 4 1 309.39 2.33
 -3 4 1 339.83 1.77
 3 -4 -1 346 2.33
 3 -4 -1 290.97 2.33
 3 -4 1 376.67 2.04
 4 3 -1 218.91 2.26
 4 3 -1 364.74 2.08
 4 3 1 351.02 1.75
 -4 -3 -3 727.27 2.32
 -4 -3 3 560.07 3.4
 -4 -3 3 744.45 3.43
 -4 -3 3 795.17 3.66
 -3 4 -3 878.32 5
 -3 4 3 452.67 2.82
 -3 4 3 544.76 2.91
 3 -4 -3 615.96 3.49
 3 -4 -3 768.26 3.72
 4 3 -3 810.81 2.69
 4 3 -3 624.31 3.46
 4 3 -3 778.12 3.06
 4 3 3 609.52 1.83
 -4 -3 5 325.74 2.91
 -4 -3 5 353.83 2.83
 -4 -3 5 411.75 2.71
 -3 4 -5 402.47 3.73
 -3 4 5 279.47 2.46
 -3 4 5 362.41 2.46
 3 -4 -5 316.82 2.71
 3 -4 -5 523.66 3.2
 4 3 -5 373.03 2.24
 4 3 -5 278 1.81
 4 3 -5 370.52 2.47
 -4 -3 7 556.67 4.02
 -4 -3 7 622.74 3.29
 -3 4 -7 551.1 4.78
 -3 4 7 655.82 3.78
 3 -4 -7 671.98 4.17
 3 -4 -7 1038.65 3.69
 4 3 -7 719.8 3.57
 -4 -3 9 31.26 0.83
 -3 4 -9 35.24 1.45
 -3 4 9 31.39 0.91
 3 -4 -9 29.59 0.84
 -4 -3 11 377.5 2.68
 -3 4 -11 489.2 4.58
 -3 4 11 370.13 2.78
 4 3 11 258.94 1.61
 -4 -3 13 51.85 1.06
 -3 4 -13 68.3 1.68
 -3 4 13 61.01 1.18
 4 3 13 49.11 0.87
 -4 -4 0 38.49 0.83
 -4 -4 0 28.1 0.78
 -4 4 0 44.61 0.84
 4 -4 0 46.54 0.92
 4 4 0 21.93 0.75
 4 4 0 39.22 0.71
 -4 -4 -2 20.38 0.54
 -4 -4 2 24.09 0.87
 -4 -4 2 19.56 0.68
 -4 4 -2 20.96 0.67
 -4 4 -2 25.56 1.01
 -4 4 2 24.9 0.83
 -4 4 2 19.57 0.59
 4 -4 -2 22.84 0.79
 4 -4 -2 21.67 0.79
 4 -4 2 24.92 0.56
 4 4 -2 14.46 0.62
 4 4 -2 23.27 0.64
 4 4 2 22.87 0.5
 -4 -4 -4 16.4 0.46
 -4 -4 4 14 0.66
 -4 -4 4 17.62 0.66
 -4 -4 4 17.93 0.74
 -4 4 -4 18.23 0.94
 -4 4 4 13.25 0.59
 -4 4 4 14.84 0.58
 -4 4 4 15.69 0.6
 4 -4 -4 15.23 0.73
 4 -4 -4 18.68 0.72
 4 4 -4 15.6 0.52
 4 4 -4 16.18 0.55
 4 4 -4 12.97 0.59
 4 4 -4 17.36 0.51
 4 4 4 15.88 0.42
 -4 -4 6 37.59 1.03
 -4 -4 6 47.45 1.05
 -4 4 -6 47.27 1.54
 -4 4 6 44.38 1.01
 4 -4 -6 44.22 1.16
 4 4 -6 42.46 0.88
 4 4 -6 40.06 0.6
 4 4 -6 50.56 0.79
 4 4 6 35.71 0.6
 -4 -4 8 8.89 0.61
 -4 -4 8 10.25 0.59
 -4 4 -8 10.77 1
 -4 4 8 9.86 0.61
 4 -4 -8 9.37 0.64
 4 -4 -8 12.59 0.46
 4 4 8 9.66 0.47
 -4 -4 10 92.61 1.35
 -4 4 -10 113.15 2.41
 -4 4 10 70.75 1.41
 -4 4 10 80.63 1.36
 4 -4 -10 84.38 1.3
 4 4 10 89.56 1.16
 -4 -4 12 12.73 0.6
 -4 4 -12 16.9 1.09
 -4 4 12 13.31 0.66
 4 4 12 13.03 0.57
 -5 4 -1 307.91 2.51
 -5 4 -1 455.24 3.68
 -5 4 1 493.41 3.69
 -5 4 1 486.27 3.24
 -4 -5 -1 427.88 2.73
 -4 -5 -1 294.35 1.93
 -4 -5 1 416.17 2.89
 -4 -5 1 469.38 2.95
 4 5 -1 447.79 2.52
 4 5 1 325.59 2.66
 4 5 1 428.7 2.34
 5 -4 -1 396.49 3.11
 5 -4 -1 316.06 2.48
 5 -4 1 499.89 2.91
 5 -4 1 522.32 2.8
 -5 4 -3 305.31 3.32
 -5 4 3 332.85 2.62
 -5 4 3 248.76 2.05
 -4 -5 -3 274.95 1.89
 -4 -5 3 316.29 2.94
 -4 -5 3 324.24 2.67
 4 5 -3 242.32 2.3
 4 5 -3 325.84 2.11
 4 5 3 267.99 1.72
 5 -4 -3 244.31 2.54
 5 -4 -3 259.72 2.23
 -5 4 -5 520.01 4.7
 -5 4 5 474.42 3.16
 -5 4 5 527.47 3.09
 -4 -5 -5 492.5 2.39
 -4 -5 5 392.73 3.05
 -4 -5 5 654.7 3.86
 4 5 -5 480.36 2.66
 4 5 -5 460.62 2.48
 4 5 -5 470.77 2.76
 4 5 5 377.13 2.07
 5 -4 -5 487.94 3.76
 5 -4 -5 576.81 3.09
 -5 4 -7 59.29 1.79
 -5 4 7 61.03 1.33
 -5 4 7 61.02 1.19
 -4 -5 7 48.3 1.16
 -4 -5 7 70.13 1.32
 4 5 -7 48.66 0.98
 4 5 7 45.1 0.76
 5 -4 -7 73.53 1.57
 -5 4 -9 524.19 5.33
 -5 4 9 381.43 3.22
 -5 4 9 402.06 2.9
 -4 -5 9 446.38 3.01
 4 5 9 334.38 2.07
 5 -4 -9 390.09 3.04
 5 -4 -9 493.09 1.6
 5 -4 -9 350.76 1.31
 -5 4 -11 110.69 2.37
 -5 4 11 86.88 1.39
 -4 -5 11 94.11 1.39
 4 5 11 80.19 1.12
 5 -4 -11 85.1 1.25
 -5 3 0 0.56 0.31
 -5 3 0 1.35 0.4
 -5 3 0 1.4 0.21
 -3 -5 0 1.23 0.29
 -3 -5 0 0.73 0.37
 3 5 0 0.87 0.38
 3 5 0 0.86 0.23
 5 -3 0 1.32 0.34
 -5 3 -2 300.44 1.56
 -5 3 -2 250.44 2.77
 -5 3 2 248.16 2.74
 -5 3 2 203.84 1.99
 -5 3 2 221.43 1.84
 -3 -5 -2 219.63 1.72
 -3 -5 2 257.24 2.4
 -3 -5 2 196.1 2.12
 3 5 -2 230.67 1.72
 3 5 2 267.44 2.87
 3 5 2 272.5 1.73
 5 -3 -2 204.1 2.22
 5 -3 -2 179.97 1.83
 -5 3 -4 3.79 0.65
 -5 3 4 5.14 0.56
 -5 3 4 6.74 0.51
 -5 3 4 3.6 0.44
 -3 -5 -4 6 0.39
 -3 -5 4 4.39 0.44
 -3 -5 4 4.98 0.47
 -3 -5 4 3.8 0.53
 3 5 -4 4.17 0.43
 3 5 -4 4.77 0.36
 3 5 -4 4.19 0.46
 3 5 4 4.15 0.33
 5 -3 -4 4.84 0.53
 5 -3 -4 4.18 0.43
 -5 3 -6 150.68 2.67
 -5 3 6 177.64 2.27
 -5 3 6 185.06 2.08
 -3 -5 -6 137.3 1.27
 -3 -5 6 138.85 1.79
 -3 -5 6 138.69 1.8
 3 5 -6 142.72 1.62
 3 5 6 116.15 1.18
 3 5 6 122.82 1.21
 5 -3 -6 175.91 2.37
 -5 3 -8 9.17 1.02
 -5 3 8 7.67 0.58
 -5 3 8 6.47 0.56
 -3 -5 8 6.94 0.59
 3 5 -8 6.01 0.5
 3 5 8 7.22 0.43
 5 -3 -8 7.19 0.59
 -5 3 -10 185.36 3
 -5 3 10 149.03 2.01
 -5 3 10 131.87 1.74
 -3 -5 10 162.79 1.91
 3 5 10 152 1.56
 5 -3 -10 134.49 1.65
 -5 3 -12 11.73 0.98
 -5 3 12 9.1 0.61
 -3 -5 12 11.53 0.6
 3 5 12 9.28 0.54
 -5 2 -1 352.72 2.26
 -5 2 -1 291.7 2.65
 -5 2 1 219.02 2.2
 -5 2 1 345.2 2.36
 -5 2 1 311.68 2.18
 -5 2 1 254.81 1.5
 -2 -5 -1 261.14 1.91
 -2 -5 -1 157.95 1.64
 -2 -5 1 267.3 2.15
 -2 -5 1 244.54 2.31
 2 5 -1 197.92 2.14
 2 5 -1 255.97 1.79
 2 5 1 241.4 2.42
 2 5 1 288.89 1.8
 5 -2 -1 194.35 2.08
 5 -2 -1 357.41 2.55
 5 -2 1 202.89 1.8
 5 -2 1 232 1.02
 5 -2 1 305.36 1.37
 -5 2 -3 7.1 0.69
 -5 2 3 2.88 0.46
 -5 2 3 6.21 0.51
 -5 2 3 2.54 0.36
 -2 -5 -3 2.57 0.3
 -2 -5 3 2.5 0.39
 -2 -5 3 2.53 0.46
 2 5 -3 4.61 0.35
 2 5 -3 1.86 0.36
 2 5 3 4.39 0.47
 2 5 3 3.97 0.32
 5 -2 -3 2.34 0.42
 5 -2 -3 2.64 0.35
 -5 2 -5 138.47 2.53
 -5 2 5 163.69 2.36
 -5 2 5 150.34 1.78
 -5 2 5 142.45 1.93
 -2 -5 -5 103.37 1.22
 -2 -5 5 101.87 1.49
 -2 -5 5 118.96 1.64
 2 5 -5 119.62 1.53
 2 5 5 88.44 1.07
 2 5 5 94.34 1.11
 5 -2 -5 125.03 2
 5 -2 -5 127.14 1.35
 -5 2 -7 1.57 0.64
 -5 2 7 0.74 0.37
 -5 2 7 0.94 0.38
 -2 -5 -7 2.76 0.31
 -2 -5 7 1.15 0.32
 -2 -5 7 1.98 0.42
 2 5 -7 0.95 0.35
 2 5 7 1.43 0.29
 5 -2 -7 0.65 0.33
 -5 2 -9 116.67 2.34
 -5 2 9 105.99 1.7
 -5 2 9 92.07 1.47
 -2 -5 9 83.85 1.39
 2 5 -9 92.91 1.59
 2 5 9 108.87 1.37
 5 -2 -9 93.08 1.42
 -5 2 -11 9.22 0.89
 -5 2 11 8.86 0.58
 -2 -5 11 9.8 0.61
 2 5 11 11.64 0.6
 5 -2 -11 10.2 0.5
 -5 1 0 2.47 0.39
 -5 1 0 2.47 0.36
 -1 -5 0 1.92 0.27
 1 5 0 2.19 0.37
 1 5 0 1.54 0.23
 5 -1 0 2.39 0.38
 5 -1 0 1.72 0.25
 -5 1 -2 11.77 0.86
 -5 1 2 8.53 0.56
 -5 1 2 11.48 0.34
 -5 1 2 12.24 0.66
 -5 1 2 10.19 0.55
 -1 -5 -2 10.26 0.43
 -1 -5 -2 9.01 0.49
 -1 -5 -2 7.43 0.53
 -1 -5 2 9.52 0.5
 -1 -5 2 11.29 0.66
 1 5 -2 13.85 0.48
 1 5 -2 10.37 0.51
 1 5 2 12.07 0.64
 1 5 2 11.3 0.42
 5 -1 -2 10.43 0.71
 5 -1 -2 12.39 0.59
 -5 1 -4 23.26 1.25
 -5 1 4 15.7 0.73
 -5 1 4 18.86 0.68
 -5 1 4 21.62 0.9
 -1 -5 -4 20.49 0.61
 -1 -5 -4 14.91 0.57
 -1 -5 4 22.38 0.81
 -1 -5 4 24.27 0.81
 1 5 -4 21.22 0.74
 1 5 4 20.72 0.73
 1 5 4 17.14 0.56
 5 -1 -4 16.46 0.75
 5 -1 -4 16.16 0.57
 -5 1 -6 37.23 1.38
 -5 1 6 38.48 1.1
 -5 1 6 26.81 0.88
 -1 -5 -6 28.74 0.71
 -1 -5 6 27.14 0.8
 -1 -5 6 34.87 0.86
 1 5 -6 31.28 0.92
 1 5 6 26.71 0.66
 5 -1 -6 24.81 0.82
 -5 1 -8 45.24 1.5
 -5 1 8 43.06 1.15
 -5 1 8 31.69 0.93
 -1 -5 -8 39.95 0.83
 -1 -5 8 35.26 0.88
 1 5 -8 35.78 1.06
 1 5 8 40.97 0.88
 5 -1 -8 32.74 0.87
 5 -1 -8 54.51 0.71
 5 -1 -8 29.52 0.47
 -5 1 -10 75.96 1.83
 -5 1 10 75.26 1.48
 -5 1 10 57.14 1.18
 -1 -5 10 50.23 1.08
 1 5 -10 68.45 1.49
 1 5 10 83.13 1.33
 5 -1 -10 67.09 1.14
 -5 1 -12 67.01 1.71
 -5 1 12 57.16 1.18
 -1 -5 12 59.62 1.17
 1 5 12 63.76 1.14
 -5 0 -1 664.79 2.71
 -5 0 -1 648.91 4.13
 -5 0 1 668.52 3.9
 -5 0 1 490.56 1.94
 -5 0 1 630.24 2.79
 -5 0 1 555.17 2.61
 0 -5 -1 556.04 2.7
 0 -5 -1 569.77 3.16
 0 -5 1 527.56 2.74
 0 -5 1 532.4 2.96
 0 5 -1 417.9 2.52
 0 5 -1 593.41 2.25
 0 5 1 437.88 2.96
 0 5 1 619.36 2.53
 5 0 -1 478 3.49
 5 0 -1 678.57 3.01
 5 0 1 515.64 3.62
 5 0 1 608.76 1.8
 -5 0 -3 727.63 5.36
 -5 0 3 487.98 3.52
 -5 0 3 618.75 3.89
 -5 0 3 585.8 3.77
 0 -5 -3 621.72 3.09
 0 -5 -3 493.04 2.8
 0 -5 -3 514.38 2.68
 0 -5 3 567.22 3.1
 0 -5 3 630.35 3.08
 0 5 -3 652.82 3.73
 0 5 3 547.52 3.45
 0 5 3 561.88 2.76
 5 0 -3 445.77 3.26
 5 0 -3 628.89 3.32
 -5 0 -5 752.6 5.64
 -5 0 5 480.85 3.46
 -5 0 5 678.63 3.66
 -5 0 5 408.73 2.98
 0 -5 -5 471.22 2.8
 0 -5 -5 607.15 2.53
 0 -5 5 738.48 4.07
 0 -5 5 646.79 2.88
 0 5 -5 512.24 3.45
 0 5 5 415.61 2.36
 0 5 5 433.37 2.41
 5 0 -5 528.5 3.49
 5 0 -5 617.79 3.05
 5 0 -5 585 2.65
 -5 0 -7 530.15 4.67
 -5 0 7 430.07 3.37
 -5 0 7 418.62 3.07
 0 -5 -7 481.41 2.9
 0 -5 7 495.05 2.48
 0 5 -7 476.51 3.64
 0 5 7 485.34 2.77
 5 0 -7 397.32 2.87
 5 0 -7 624.06 2.68
 5 0 -7 419.6 2.1
 -5 0 -9 628.17 4.97
 -5 0 9 533.54 3.76
 -5 0 9 478.24 3.26
 0 -5 9 571.99 2.93
 0 5 -9 562.78 4.19
 0 5 9 653.53 3.55
 5 0 -9 581.3 3.31
 -5 0 -11 473.31 4.3
 -5 0 11 371.15 2.82
 0 -5 11 339.21 2.58
 0 5 -11 452.9 3.76
 0 5 11 419.56 2.85
 -5 0 -13 450.14 4.18
 -5 0 13 340.47 2.67
 0 -5 13 425.2 2.86
 0 5 13 392.51 2.69
 -5 -1 0 1.88 0.33
 -1 5 0 0.77 0.27
 -1 5 0 1.36 0.22
 1 -5 0 2.58 0.3
 1 -5 0 1.26 0.33
 5 1 0 2.63 0.59
 -5 -1 -2 570.33 1.87
 -5 -1 -2 640.81 4.45
 -5 -1 2 609.76 3.97
 -5 -1 2 647.62 3.11
 -5 -1 2 597.1 3.87
 -1 5 -2 750.75 2.01
 -1 5 2 599.3 3.65
 -1 5 2 509.26 2.47
 1 -5 -2 649.82 3.13
 1 -5 -2 561.58 3.15
 1 -5 2 560.67 2.73
 1 -5 2 589.26 2.83
 5 1 -2 602.18 4.08
 5 1 -2 686.77 3.1
 -5 -1 -4 38.99 1.64
 -5 -1 4 28.8 0.96
 -5 -1 4 29.71 0.93
 -5 -1 4 21.27 0.82
 -1 5 -4 31.95 1
 -1 5 4 36.01 1.03
 -1 5 4 24.08 0.66
 1 -5 -4 25.73 0.74
 1 -5 -4 34.33 0.85
 1 -5 -4 34.31 0.81
 1 -5 4 32.29 0.81
 1 -5 4 31.21 0.62
 5 1 -4 25.15 0.85
 5 1 -4 23.14 0.65
 -5 -1 -6 603.44 4.99
 -5 -1 6 464.84 3.45
 -5 -1 6 585.14 3.83
 -1 5 -6 606.22 4.18
 -1 5 6 532.64 2.86
 1 -5 -6 448.54 2.89
 1 -5 -6 702.94 2.6
 5 1 -6 615.86 3.66
 5 1 -6 511.33 2.73
 -5 -1 -8 26.91 1.14
 -5 -1 8 21.24 0.8
 -5 -1 8 24.73 0.86
 -1 5 -8 25.24 1.05
 -1 5 8 29.11 0.83
 1 -5 -8 27.95 0.82
 5 1 -8 31.01 0.87
 5 1 -8 35.16 0.39
 -5 -1 -10 303.93 3.42
 -5 -1 10 277.63 2.41
 -1 5 -10 326.06 3.44
 -1 5 10 357.6 2.69
 1 -5 10 353.06 2.09
 -5 -1 12 2.26 0.39
 -1 5 -12 2.51 0.54
 -1 5 12 1.06 0.33
 1 -5 12 1.28 0.36
 -5 -2 -1 2.39 0.29
 -5 -2 1 1.83 0.36
 -5 -2 1 2.8 0.56
 -2 5 -1 1.58 0.3
 -2 5 1 1.96 0.35
 -2 5 1 2.41 0.28
 2 -5 -1 1.57 0.36
 2 -5 1 3.31 0.31
 2 -5 1 2.9 0.37
 5 2 -1 2.2 0.5
 5 2 -1 1.88 0.28
 5 2 1 1.65 0.43
 5 2 1 2.31 0.27
 -5 -2 -3 91.26 0.65
 -5 -2 -3 96.43 1.97
 -5 -2 3 89.6 1.53
 -5 -2 3 88.41 1.27
 -5 -2 3 58.71 1.17
 -2 5 -3 104.45 1.75
 -2 5 3 88.54 1.5
 -2 5 3 91.31 1.27
 2 -5 -3 93.93 1.34
 2 -5 -3 93 1.39
 2 -5 3 83.47 1.05
 5 2 -3 103.16 1.8
 5 2 -3 97.51 1.21
 -5 -2 -5 20.83 1.43
 -5 -2 5 15.99 0.85
 -5 -2 5 16.83 0.74
 -5 -2 5 13.5 0.74
 -2 5 -5 16.78 0.85
 -2 5 5 18.65 0.82
 -2 5 5 11.78 0.5
 -2 5 5 12.82 0.53
 2 -5 -5 12.47 0.57
 2 -5 -5 19.27 0.76
 5 2 -5 16.57 0.83
 5 2 -5 19.03 0.48
 5 2 -5 17.01 0.57
 5 2 -5 12.15 0.55
 -5 -2 -7 135.93 2.46
 -5 -2 7 128.92 1.89
 -5 -2 7 125.51 1.64
 -2 5 -7 133.63 2.23
 -2 5 7 128.96 1.55
 2 -5 -7 123.51 1.65
 2 -5 -7 160.05 1.15
 5 2 -7 138.76 1.12
 5 2 -7 108.22 1.01
 -5 -2 -9 46.48 1.46
 -5 -2 9 46.56 1.17
 -5 -2 9 41.59 0.97
 -2 5 -9 49.3 1.48
 -2 5 9 52.33 1.1
 2 -5 -9 43.61 0.99
 -5 -2 11 135.4 1.67
 -2 5 -11 175.92 2.63
 -2 5 11 164.1 1.83
 -5 -3 0 5.7 0.58
 -3 5 0 2.62 0.41
 3 -5 0 3.02 0.4
 -5 -3 -2 155.72 1.31
 -5 -3 2 137.02 1.79
 -5 -3 2 75.78 1.21
 -3 5 -2 203.79 2.59
 -3 5 2 99.45 1.34
 -3 5 2 157.93 1.48
 3 -5 -2 161.68 1.77
 3 -5 -2 140.54 1.7
 3 -5 2 159.29 1.4
 5 3 -2 179.46 1.65
 5 3 2 160.82 1.12
 -5 -3 -4 93.45 0.73
 -5 -3 4 64.73 1.29
 -5 -3 4 82.18 1.3
 -5 -3 4 78.27 1.29
 -3 5 -4 90.72 1.77
 -3 5 4 73.34 1.33
 -3 5 4 64.92 1.06
 3 -5 -4 106.03 1.5
 5 3 -4 82.68 0.86
 5 3 -4 82.29 1.19
 5 3 -4 67.64 1.23
 5 3 -4 85.97 1.12
 5 3 4 71.19 0.77
 5 3 4 84.5 0.64
 -5 -3 6 99.87 1.79
 -5 -3 6 122.08 1.56
 -3 5 -6 118.96 2.14
 -3 5 6 114.07 1.43
 3 -5 -6 104.17 1.57
 5 3 -6 109.7 1.3
 -5 -3 8 70 1.48
 -5 -3 8 66.54 1.17
 -3 5 -8 74.98 1.87
 -3 5 8 80.53 1.33
 3 -5 -8 71.25 1.36
 3 -5 -8 76.8 0.59
 -5 -3 10 66.75 1.17
 -3 5 -10 78.67 1.96
 -3 5 10 69.02 1.23
 3 -5 -10 70.11 1.16
 -5 -3 12 20.16 0.71
 -3 5 -12 25.63 1.17
 -3 5 12 20.38 0.74
 -5 -4 -1 320.89 2.19
 -5 -4 1 416.24 3.24
 -5 -4 1 224.18 1.95
 -4 5 -1 451.98 3.86
 -4 5 1 397.09 2.96
 -4 5 1 357.24 1.95
 4 -5 -1 344.23 2.6
 4 -5 -1 319.17 2.72
 4 -5 1 364.96 2.37
 5 4 -1 263.64 2.53
 5 4 -1 371.27 2.36
 5 4 1 179.11 2.08
 5 4 1 333.24 1.97
 -5 -4 -3 388.91 2.03
 -5 -4 3 328.89 2.82
 -5 -4 3 418.87 2.77
 -5 -4 3 387.6 2.6
 -4 5 -3 403.27 1.83
 -4 5 -3 491.77 4.09
 -4 5 3 298.27 2.37
 -4 5 3 382.47 2.63
 4 -5 -3 325.35 2.71
 4 -5 -3 427.24 3.09
 4 -5 3 409.95 2.14
 5 4 -3 337.52 2.61
 5 4 -3 464.42 2.63
 5 4 3 417.79 1.93
 -5 -4 -5 40.38 0.54
 -5 -4 5 32.62 0.97
 -5 -4 5 50.29 1.03
 -4 5 -5 43.8 1.37
 -4 5 5 35.5 0.93
 -4 5 5 35.62 0.84
 -4 5 5 37.69 0.87
 4 -5 -5 34.06 0.96
 5 4 -5 39.2 0.72
 5 4 -5 42.06 0.95
 5 4 5 41.94 0.62
 -5 -4 7 219.34 2.5
 -5 -4 7 235.58 2.09
 -4 5 -7 206.22 3.01
 -4 5 7 246.34 2.2
 4 -5 -7 215.56 2.37
 5 4 -7 202.73 1.21
 5 4 -7 242.87 1.48
 5 4 7 179.98 1.22
 -5 -4 9 17.8 0.8
 -5 -4 9 19.27 0.7
 -4 5 -9 19.61 1.13
 -4 5 9 19.96 0.74
 4 -5 -9 17.11 0.73
 5 4 9 20.05 0.56
 -5 -4 11 144.75 1.7
 -4 5 -11 159.02 2.74
 -4 5 11 140.92 1.72
 4 -5 -11 130.37 1.51
 5 4 11 126.44 1.33
 -5 -5 0 1.42 0.3
 -5 -5 0 0.75 0.28
 -5 5 0 3.9 0.43
 5 -5 0 1.29 0.31
 5 -5 0 1.2 0.36
 5 5 0 0.63 0.27
 5 5 0 1.45 0.26
 -5 -5 -2 1934.64 9.68
 -5 -5 2 2516.57 12.33
 -5 -5 2 2372.64 12.77
 -5 5 -2 1656.36 5.55
 -5 5 -2 2453.8 9.21
 -5 5 2 2022.41 10.25
 -5 5 2 1976.33 6.71
 5 -5 -2 1831.48 6.67
 5 -5 -2 1899.11 7.37
 5 -5 2 2258.05 7.88
 5 -5 2 2104.06 8.26
 5 5 -2 1263.13 6.06
 5 5 -2 1892.18 5.54
 5 5 2 2317.04 10.69
 -5 -5 -4 3.71 0.32
 -5 -5 4 2.03 0.39
 -5 -5 4 2.7 0.37
 -5 -5 4 2.04 0.38
 -5 5 -4 2.13 0.55
 -5 5 4 3.06 0.38
 -5 5 4 3.65 0.42
 5 -5 -4 2.29 0.39
 5 5 -4 3.24 0.36
 5 5 -4 1.54 0.32
 5 5 4 2.43 0.3
 -5 -5 6 1021.42 5.11
 -5 -5 6 1564.35 8.53
 -5 5 -6 1365.27 7.75
 -5 5 6 1186.14 4.67
 -5 5 6 1314.31 4.92
 5 -5 -6 1202.25 5.73
 5 5 -6 1443.66 7.72
 5 5 6 860.59 3.13
 -5 -5 8 1.79 0.41
 -5 -5 8 1.75 0.36
 -5 5 -8 1.41 0.56
 -5 5 8 1.32 0.35
 5 -5 -8 1.12 0.38
 5 5 8 0.94 0.23
 5 5 8 1.32 0.25
 -5 -5 10 841.47 4.06
 -5 5 -10 890.89 6.82
 -5 5 10 620.33 4.16
 -5 5 10 644.38 3.6
 5 -5 -10 684.03 3.83
 5 5 10 472.56 2.43
 -5 -5 12 0.54 0.33
 -5 5 -12 0.61 0.54
 -5 5 12 1.11 0.33
 5 5 12 1.02 0.28
 -6 5 -1 407.34 3.07
 -6 5 -1 684.66 4.92
 -6 5 1 712.14 4.73
 -6 5 1 661.53 3.84
 -5 -6 -1 486.68 3.04
 -5 -6 1 608 3.67
 -5 -6 1 628.97 3.32
 5 6 -1 428.69 3.08
 5 6 -1 588.55 3.06
 5 6 1 423.98 3.05
 5 6 1 647.46 3.07
 6 -5 -1 572.21 3.9
 6 -5 -1 415.3 3.01
 6 -5 1 616.61 3.66
 6 -5 1 548.12 3.53
 -6 5 -3 238.85 3.14
 -6 5 3 211.16 2.43
 -6 5 3 205.32 2.04
 -6 5 3 178.44 1.81
 -5 -6 -3 207.17 1.83
 -5 -6 3 248.6 2.8
 -5 -6 3 266.51 2.32
 5 6 -3 197 2.07
 5 6 -3 246.86 2.07
 5 6 3 262.96 1.93
 6 -5 -3 194.13 2.37
 6 -5 -3 189.94 2.02
 6 -5 3 233.49 1.4
 -6 5 -5 435.04 4.48
 -6 5 5 399.55 3.33
 -6 5 5 468.97 3.09
 -6 5 5 404.73 2.72
 -5 -6 -5 473.12 2.6
 -5 -6 5 360.91 3.11
 -5 -6 5 551.06 3.49
 5 6 -5 427.89 2.56
 5 6 -5 457.46 3.01
 5 6 5 410.72 2.36
 6 -5 -5 389.9 3.41
 -6 5 -7 237.78 3.55
 -6 5 7 190.9 2.32
 -6 5 7 256.46 2.3
 -6 5 7 263.1 2.33
 -5 -6 7 167.34 2.14
 -5 -6 7 263.74 2.38
 5 6 -7 184.38 1.03
 5 6 -7 258.94 1.32
 5 6 7 190.32 1.67
 6 -5 -7 240.23 2.72
 -6 5 -9 450.53 5.01
 -6 5 9 315.76 3.01
 -6 5 9 374.35 2.75
 -5 -6 9 422.69 2.95
 5 6 9 207.27 1.7
 6 -5 -9 370.22 3.1
 -6 5 -11 20.15 1.24
 -6 5 11 17.49 0.79
 -6 5 11 17.47 0.7
 -5 -6 11 20.6 0.77
 5 6 11 11.83 0.5
 6 -5 -11 16.56 0.69
 -6 4 0 222.94 2.32
 -6 4 0 390.69 3.41
 -6 4 0 359.45 1.63
 -4 -6 0 308.38 2.45
 -4 -6 0 316.43 2.35
 4 6 0 266.42 2.7
 4 6 0 279.61 1.98
 6 -4 0 333.17 2.84
 6 -4 0 368.38 2.88
 -6 4 -2 28.14 0.68
 -6 4 -2 22.11 1.09
 -6 4 2 25.32 1.02
 -6 4 2 16.9 0.71
 -6 4 2 19.35 0.59
 -4 -6 -2 18.95 0.64
 -4 -6 2 19.42 0.77
 -4 -6 2 18.97 0.82
 4 6 -2 17.1 0.76
 4 6 -2 20.54 0.65
 4 6 2 22.27 0.93
 4 6 2 21.24 0.62
 6 -4 -2 19.15 0.81
 6 -4 -2 14.41 0.64
 6 -4 2 25.96 0.78
 6 -4 2 27.07 0.64
 -6 4 -4 277.89 3.48
 -6 4 4 318.76 3.13
 -6 4 4 281.16 2.39
 -6 4 4 258.24 2.12
 -4 -6 -4 274.78 2.03
 -4 -6 4 269.76 2.73
 -4 -6 4 305.74 2.79
 4 6 -4 295.5 2.29
 4 6 -4 227 2.17
 4 6 4 277.66 1.92
 6 -4 -4 251.11 2.76
 6 -4 -4 270.83 2.25
 -6 4 -6 8.18 0.97
 -6 4 6 6.02 0.59
 -6 4 6 7.2 0.55
 -4 -6 -6 5.81 0.37
 -4 -6 6 5.26 0.51
 -4 -6 6 6.62 0.62
 4 6 -6 5.83 0.46
 4 6 -6 4.84 0.26
 4 6 -6 7.19 0.38
 4 6 6 6.29 0.42
 6 -4 -6 8.28 0.68
 -6 4 -8 298.99 4.11
 -6 4 8 242.68 2.64
 -6 4 8 257.17 2.31
 -4 -6 8 192 2.27
 -4 -6 8 270.39 2.56
 4 6 8 161.3 1.5
 6 -4 -8 253.58 2.7
 -6 4 -10 1.2 0.61
 -6 4 10 0.63 0.35
 -6 4 10 0.33 0.31
 -4 -6 10 0.78 0.35
 4 6 10 0.18 0.24
 4 6 10 0.5 0.25
 6 -4 -10 0.01 0.29
 -6 4 -12 275.79 3.7
 -6 4 12 211.35 2.11
 -4 -6 12 246.34 2.26
 4 6 12 182.86 1.71
 4 6 12 194.55 1.76
 -6 3 -1 111.53 1.45
 -6 3 -1 103.88 1.82
 -6 3 1 67.79 1.32
 -6 3 1 102.52 1.51
 -6 3 1 108.78 1.35
 -3 -6 -1 84.45 1.25
 -3 -6 -1 50.48 1.13
 -3 -6 -1 98.04 1.35
 -3 -6 1 88.85 1.34
 -3 -6 1 71.4 1.34
 3 6 -1 80.81 1.56
 3 6 -1 105.97 1.25
 3 6 1 116.77 1.99
 3 6 1 118.9 1.31
 6 -3 -1 85.35 1.49
 6 -3 -1 125.04 1.74
 6 -3 1 100.87 1.45
 6 -3 1 146.63 1.45
 -6 3 -3 0.71 0.51
 -6 3 3 0.71 0.39
 -6 3 3 0.93 0.32
 -6 3 3 0.74 0.28
 -3 -6 -3 1.74 0.29
 -3 -6 3 0.55 0.33
 -3 -6 3 0.67 0.44
 3 6 -3 0.83 0.28
 3 6 -3 3.82 0.46
 3 6 -3 1.77 0.27
 6 -3 -3 0.57 0.36
 6 -3 -3 1.03 0.32
 -6 3 -5 102.65 2.28
 -6 3 5 130.97 2.11
 -6 3 5 102.18 1.47
 -6 3 5 125.68 1.66
 -3 -6 -5 105 1.3
 -3 -6 5 92.37 1.57
 -3 -6 5 77.12 1.49
 3 6 -5 94.93 1.37
 3 6 -5 90.83 0.96
 3 6 -5 127.49 1.28
 3 6 5 95.33 1.19
 6 -3 -5 114.3 1.96
 6 -3 -5 102.8 1.32
 -6 3 -7 13.98 1.1
 -6 3 7 13.79 0.75
 -6 3 7 13.52 0.69
 -3 -6 -7 8.88 0.42
 -3 -6 7 9.22 0.58
 -3 -6 7 9.43 0.68
 3 6 -7 9.67 0.56
 3 6 7 8.29 0.44
 6 -3 -7 13.03 0.77
 -6 3 -9 55.36 1.8
 -6 3 9 41.36 1.12
 -6 3 9 48.93 1.12
 -3 -6 9 42.82 1.1
 3 6 9 32.38 0.74
 3 6 9 35.41 0.78
 6 -3 -9 44.25 1.12
 6 -3 -9 36.12 0.56
 -6 3 -11 85.13 2.14
 -6 3 11 72.78 1.44
 -6 3 11 77.63 1.36
 -3 -6 11 78.71 1.39
 3 6 11 60.83 1.04
 6 -3 -11 78.82 1.25
 -6 2 0 2608.55 14.12
 -6 2 0 2634.32 12.3
 -2 -6 0 2601.42 13.02
 -2 -6 0 2006.48 11.39
 2 6 0 2155.27 8.67
 2 6 0 2785.88 11.9
 6 -2 0 1825.28 6.47
 6 -2 0 3654.82 14.99
 -6 2 -2 14.29 0.35
 -6 2 -2 12.36 0.86
 -6 2 2 8.43 0.6
 -6 2 2 11.62 0.46
 -6 2 2 13.56 0.71
 -6 2 2 9.52 0.48
 -2 -6 -2 10.39 0.47
 -2 -6 -2 8.08 0.6
 -2 -6 -2 8.18 0.53
 -2 -6 2 10.43 0.55
 -2 -6 2 9.46 0.71
 2 6 -2 12.97 0.53
 2 6 -2 10.14 0.62
 2 6 -2 13.16 0.48
 2 6 2 10.66 0.68
 2 6 2 11.41 0.45
 6 -2 -2 12.22 0.75
 6 -2 -2 13.47 0.72
 6 -2 2 10.53 0.53
 -6 2 -4 1835 9.02
 -6 2 4 1848.55 9.95
 -6 2 4 2083.85 6.59
 -6 2 4 2147.23 10.5
 -2 -6 -4 1897.15 9.15
 -2 -6 4 2031.09 7.45
 -2 -6 4 1916.41 10.48
 2 6 -4 1700.76 5.91
 2 6 -4 1642.29 5.82
 2 6 -4 2064.12 9.97
 2 6 4 1602.48 7.05
 6 -2 -4 1583.8 7.1
 6 -2 -4 1436.92 4.98
 -6 2 -6 7.48 0.93
 -6 2 6 7.11 0.67
 -6 2 6 6.74 0.63
 -2 -6 -6 7.5 0.44
 -2 -6 6 5.38 0.51
 -2 -6 6 5.92 0.61
 2 6 -6 6 0.51
 2 6 6 4.39 0.37
 6 -2 -6 6.13 0.61
 -6 2 -8 1393.87 8.13
 -6 2 8 1228.65 5.88
 -6 2 8 1082.97 4.96
 -2 -6 8 864.43 4.57
 2 6 -8 1006.63 4.85
 2 6 8 768.91 3.35
 2 6 8 824.32 3.47
 6 -2 -8 1084.96 5.17
 -6 2 -10 1.61 0.57
 -6 2 10 0.63 0.35
 -6 2 10 0.93 0.37
 -2 -6 10 1.8 0.42
 2 6 10 1.08 0.3
 6 -2 -10 1.47 0.34
 -6 2 -12 638.94 5.28
 -6 2 12 545.38 3.52
 -2 -6 12 629.94 3.79
 2 6 12 561.69 3.15
 -6 1 -1 771.09 3.26
 -6 1 -1 568.25 3.72
 -6 1 1 749.77 4.39
 -6 1 1 572.24 2.5
 -6 1 1 719.64 3.12
 -1 -6 -1 615.62 3.11
 -1 -6 -1 546.46 3.24
 -1 -6 1 592.02 3.33
 -1 -6 1 562.64 3.53
 1 6 -1 526.35 3.37
 1 6 -1 694.99 2.95
 1 6 1 566.6 3.73
 1 6 1 799.57 3.2
 6 -1 -1 530.58 3.85
 6 -1 -1 788.39 3.53
 6 -1 1 428.2 3.01
 6 -1 1 614.18 2.25
 -6 1 -3 924.48 6.47
 -6 1 3 613.6 3.96
 -6 1 3 738.24 4.25
 -6 1 3 989.4 4.5
 -1 -6 -3 802.73 3.59
 -1 -6 -3 550.96 3.06
 -1 -6 -3 559.54 2.84
 -1 -6 3 761.77 3.88
 -1 -6 3 866.9 4.55
 1 6 -3 916.71 3.04
 1 6 -3 658.74 2.98
 1 6 3 681.3 4.13
 1 6 3 716.56 3.17
 6 -1 -3 716.31 4.72
 6 -1 -3 763.32 4.05
 -6 1 -5 302.57 3.79
 -6 1 5 224.85 2.49
 -6 1 5 289.61 2.49
 -6 1 5 221.22 2.34
 -1 -6 -5 216.4 1.94
 -1 -6 5 262.67 2.67
 -1 -6 5 252.75 2.35
 1 6 -5 238.69 2.32
 1 6 5 194.98 1.75
 6 -1 -5 192.39 2.25
 6 -1 -5 220.39 1.82
 -6 1 -7 741.74 5.84
 -6 1 7 728 4.58
 -6 1 7 557.33 3.55
 -1 -6 -7 518.22 2.88
 -1 -6 7 716.91 3.79
 1 6 -7 532.85 3.6
 1 6 7 475.26 2.64
 1 6 7 482.86 2.66
 6 -1 -7 650.9 3.97
 -6 1 -9 217.22 3.13
 -6 1 9 210.45 2.49
 -6 1 9 166.82 1.98
 -1 -6 9 170.62 1.95
 1 6 -9 165.51 2.15
 1 6 9 180.41 1.75
 6 -1 -9 197.96 2.06
 6 -1 -9 244.3 1.14
 6 -1 -9 156.16 0.84
 -6 1 -11 497.65 4.6
 -6 1 11 368.94 2.9
 -1 -6 11 330.79 2.75
 1 6 -11 400.92 3.43
 1 6 11 415.66 2.78
 -6 0 0 6.37 0.48
 -6 0 0 5.09 0.52
 0 -6 0 4.81 0.37
 0 -6 0 4.35 0.52
 0 6 0 7.98 0.54
 0 6 0 8.27 0.4
 6 0 0 4.77 0.56
 6 0 0 4.3 0.36
 -6 0 -2 2.39 0.22
 -6 0 -2 2.7 0.61
 -6 0 2 2.55 0.46
 -6 0 2 1.42 0.3
 -6 0 2 2.56 0.43
 0 -6 -2 1.16 0.27
 0 -6 -2 2.42 0.4
 0 -6 2 2.01 0.33
 0 -6 2 1.36 0.34
 0 6 -2 2.74 0.32
 0 6 -2 1.03 0.27
 0 6 2 1.68 0.37
 0 6 2 1.05 0.24
 6 0 -2 1.25 0.35
 6 0 -2 2.4 0.34
 6 0 2 1.76 0.43
 -6 0 -4 45.65 1.59
 -6 0 4 34.51 1.03
 -6 0 4 41.24 1.05
 -6 0 4 45 1.11
 0 -6 -4 44.95 0.95
 0 -6 -4 36.72 0.85
 0 -6 4 42.54 0.97
 0 -6 4 46.41 1.01
 0 6 -4 45.67 1.11
 0 6 4 41.83 1.08
 0 6 4 45.11 0.92
 6 0 -4 31.42 0.95
 6 0 -4 40.53 0.87
 -6 0 -6 32.62 1.35
 -6 0 6 21.57 0.83
 -6 0 6 23.04 0.85
 0 -6 -6 22.2 0.69
 0 -6 6 32.4 0.84
 0 6 -6 26.09 0.91
 0 6 6 22.24 0.65
 6 0 -6 25.64 0.87
 -6 0 -8 8.91 0.83
 -6 0 8 7.5 0.58
 -6 0 8 5.96 0.58
 0 -6 -8 10.95 0.54
 0 -6 8 8.33 0.53
 0 6 -8 7.82 0.61
 0 6 8 7.12 0.45
 0 6 8 6.12 0.44
 6 0 -8 6.37 0.5
 6 0 -8 5.19 0.27
 -6 0 -10 53.62 1.59
 -6 0 10 52.9 1.28
 -6 0 10 44.02 1.08
 0 -6 10 43.93 1
 0 6 -10 45.48 1.28
 0 6 10 49.5 1.02
 -6 0 -12 11.65 0.87
 -6 0 12 10.47 0.63
 0 -6 12 8.26 0.59
 0 6 -12 12.47 0.78
 0 6 12 11.65 0.59
 -6 -1 -1 38.99 0.82
 -6 -1 -1 37 1.01
 -6 -1 1 34.63 0.91
 -6 -1 1 38 0.87
 -1 6 -1 26.67 0.74
 -1 6 1 32.56 0.92
 -1 6 1 35.74 0.71
 1 -6 -1 35.55 0.8
 1 -6 -1 30.66 0.87
 1 -6 1 31.32 0.74
 1 -6 1 36.2 0.91
 6 1 -1 34.98 1.13
 6 1 -1 40.33 0.82
 6 1 1 39.71 1.26
 6 1 1 37.33 0.61
 -6 -1 -3 68.16 1.76
 -6 -1 3 61.78 1.47
 -6 -1 3 45.91 0.99
 -6 -1 3 45.61 1.11
 -1 6 -3 57.75 1.29
 -1 6 3 60.34 1.32
 -1 6 3 55.79 0.98
 1 -6 -3 59.25 1.11
 1 -6 -3 60.29 1.19
 1 -6 3 50.27 0.98
 1 -6 3 57.64 1.03
 6 1 -3 48.39 1.19
 6 1 -3 55.91 1
 -6 -1 -5 76.36 2.07
 -6 -1 5 59.63 1.34
 -6 -1 5 65.4 1.29
 -6 -1 5 47.72 1.16
 -1 6 -5 62.53 1.35
 -1 6 5 45.29 0.89
 1 -6 -5 57.33 1.1
 1 -6 -5 66.94 1.11
 1 -6 5 58.68 1.12
 1 -6 5 72.27 1.04
 6 1 -5 53 1.18
 6 1 -5 48.06 0.82
 -6 -1 -7 2.54 0.65
 -6 -1 7 1.83 0.38
 -6 -1 7 1.9 0.47
 -1 6 -7 2.74 0.47
 -1 6 7 2.41 0.34
 -1 6 7 2.32 0.35
 1 -6 -7 2.72 0.36
 1 -6 7 3.21 0.39
 6 1 -7 1.31 0.34
 6 1 -7 1.48 0.22
 -6 -1 -9 54.02 1.56
 -6 -1 9 53.62 1.28
 -6 -1 9 51.87 1.15
 -1 6 -9 53.6 1.41
 -1 6 9 56.68 1.08
 1 -6 -9 57.87 1.11
 1 -6 9 64.4 0.99
 -6 -1 -11 6.08 0.77
 -6 -1 11 5.1 0.5
 -1 6 -11 6.05 0.69
 -1 6 11 5.91 0.52
 1 -6 11 5.94 0.52
 -6 -2 0 79.29 1.31
 -2 6 0 39.65 0.86
 -2 6 0 74.97 0.91
 2 -6 0 67.09 1.08
 2 -6 0 58.08 1.14
 6 2 0 56.19 1.44
 6 2 0 60.72 0.92
 -6 -2 -2 5.57 0.35
 -6 -2 2 4.18 0.48
 -6 -2 2 4.91 0.45
 -6 -2 2 3.65 0.5
 -2 6 2 4.12 0.5
 -2 6 2 5.12 0.4
 2 -6 -2 5.03 0.43
 2 -6 -2 6.96 0.56
 2 -6 2 4.06 0.36
 2 -6 2 3.73 0.45
 6 2 -2 5.57 0.66
 6 2 -2 5.48 0.44
 6 2 2 3.94 0.51
 6 2 2 5.72 0.29
 -6 -2 -4 203.76 3.08
 -6 -2 4 151.24 1.81
 -6 -2 4 106.72 1.55
 -2 6 -4 159.79 2.19
 -2 6 4 168.28 2.27
 -2 6 4 148.2 1.66
 2 -6 -4 143.4 1.75
 2 -6 -4 232.21 2.2
 2 -6 4 143.34 1.53
 2 -6 4 188.98 1.62
 6 2 -4 189.49 2.34
 6 2 -4 176.07 1.69
 -6 -2 -6 28.23 1.46
 -6 -2 6 21.17 0.88
 -6 -2 6 18.55 0.78
 -2 6 -6 22.68 0.97
 -2 6 6 18.72 0.64
 2 -6 -6 18.98 0.71
 2 -6 6 27.39 0.58
 6 2 -6 24.1 0.85
 6 2 -6 16.03 0.56
 -6 -2 -8 206.24 3.05
 -6 -2 8 188.22 2.34
 -6 -2 8 157.69 1.82
 -2 6 -8 178.3 2.51
 -2 6 8 183.14 1.84
 -2 6 8 196.89 1.91
 2 -6 -8 184.02 2.01
 6 2 -8 193.35 1.2
 -6 -2 10 7.82 0.62
 -6 -2 10 7.1 0.51
 -2 6 -10 7.43 0.7
 -2 6 10 8.68 0.56
 2 -6 -10 7.93 0.5
 2 -6 10 10.05 0.44
 -6 -2 12 111.67 1.55
 -2 6 -12 138.04 2.28
 -2 6 12 127.83 1.61
 2 -6 12 138.5 1.55
 -6 -3 -1 445.39 2.51
 -6 -3 1 559.19 3.82
 -6 -3 1 324.73 2.69
 -3 6 -1 512.34 2.77
 -3 6 1 199.61 1.85
 -3 6 1 466.89 2.41
 3 -6 -1 472.56 3.03
 3 -6 -1 363.59 2.79
 3 -6 1 457.01 2.78
 3 -6 1 346.68 2.57
 6 3 -1 414.82 3.89
 6 3 -1 469.16 2.7
 6 3 1 417.81 2.17
 -6 -3 -3 451.3 1.95
 -6 -3 3 358.86 2.94
 -6 -3 3 407.62 2.73
 -6 -3 3 231.92 2.07
 -3 6 -3 512.69 4.1
 -3 6 3 306.44 2.62
 -3 6 3 425.96 2.79
 3 -6 -3 401.54 2.95
 3 -6 -3 477.68 3.26
 3 -6 3 379.76 2.26
 6 3 -3 481.6 4.03
 6 3 -3 443.21 1.53
 6 3 -3 305.87 2.7
 6 3 -3 478.13 2.77
 6 3 3 435.75 1.77
 -6 -3 5 296.24 2.9
 -6 -3 5 287.51 2.54
 -6 -3 5 300.38 2.39
 -3 6 -5 351.76 3.5
 -3 6 5 321.38 3.01
 -3 6 5 230.25 1.98
 3 -6 -5 268.42 2.46
 6 3 -5 283.12 2.23
 -6 -3 7 364.89 3.28
 -6 -3 7 388.84 2.7
 -3 6 -7 426.47 4
 -3 6 7 418.34 2.74
 -3 6 7 422.42 2.75
 3 -6 -7 375.07 2.94
 6 3 -7 389.64 2.12
 -6 -3 9 365.74 3.27
 -6 -3 9 397.23 2.74
 -3 6 -9 366.12 3.85
 -3 6 9 429.18 2.95
 3 -6 -9 412.62 3.09
 -6 -3 11 270.34 2.27
 -3 6 -11 372.55 3.96
 -3 6 11 339.67 2.62
 -6 -4 0 489.97 3.06
 -4 6 0 492.23 3.02
 4 -6 0 519.73 3.21
 4 -6 0 352.54 2.83
 6 4 0 440.74 2.48
 -6 -4 -2 5.59 0.4
 -6 -4 2 5.71 0.6
 -6 -4 2 2.71 0.37
 -4 6 -2 6.25 0.75
 -4 6 2 3.8 0.44
 -4 6 2 5.18 0.41
 4 -6 -2 5.14 0.52
 4 -6 -2 4.35 0.52
 4 -6 2 5.04 0.4
 4 -6 2 3.88 0.45
 6 4 -2 2.81 0.45
 6 4 -2 5.41 0.47
 6 4 2 6.01 0.4
 -6 -4 -4 609.71 2.31
 -6 -4 4 475.39 3.44
 -6 -4 4 460.91 3.02
 -6 -4 4 650.95 3.42
 -4 6 -4 681.75 5.06
 -4 6 4 365.91 2.81
 -4 6 4 476.69 2.97
 4 -6 -4 432.46 3.22
 4 -6 -4 708.38 4.06
 6 4 -4 521.17 3.24
 6 4 -4 590.35 2.99
 6 4 4 494.12 2.07
 -6 -4 6 18.52 0.81
 -6 -4 6 24.44 0.78
 -4 6 -6 21.95 1.07
 -4 6 6 19.38 0.67
 4 -6 -6 20.17 0.8
 6 4 -6 22.77 0.65
 6 4 6 19.47 0.46
 -6 -4 8 291.24 2.89
 -6 -4 8 401.46 2.74
 -4 6 -8 356.51 4.01
 -4 6 8 350.71 2.63
 -4 6 8 371.74 2.71
 4 -6 -8 344.88 2.95
 6 4 -8 341.24 1.35
 6 4 -8 378.15 1.49
 6 4 8 254.55 1.42
 -6 -4 10 1.1 0.32
 -4 6 -10 0.64 0.52
 -4 6 10 0.61 0.3
 -4 6 10 0.59 0.31
 4 -6 -10 0.68 0.32
 6 4 10 0.85 0.26
 -6 -4 12 312.18 2.45
 -4 6 -12 288.58 3.5
 -4 6 12 284.94 2.38
 6 4 12 286.3 1.89
 -6 -5 -1 6.01 0.44
 -6 -5 1 6.17 0.52
 -6 -5 1 3.8 0.42
 -5 6 -1 6.76 0.83
 -5 6 1 6.82 0.56
 5 -6 -1 6.69 0.57
 5 -6 -1 4.42 0.54
 5 -6 1 6.98 0.52
 5 -6 1 4.56 0.55
 6 5 -1 3.77 0.44
 6 5 -1 10.56 0.53
 6 5 1 5.01 0.39
 -6 -5 -3 32.63 0.72
 -6 -5 3 29.49 1
 -6 -5 3 30.06 0.82
 -5 6 -3 27.5 0.65
 -5 6 -3 33.39 1.27
 -5 6 3 27.68 0.84
 -5 6 3 30.4 0.85
 5 -6 -3 26.67 0.89
 5 -6 -3 32.4 1
 5 -6 3 32.32 0.81
 6 5 -3 23.92 0.77
 6 5 -3 36.94 0.88
 6 5 3 36.68 0.73
 -6 -5 -5 2.27 0.25
 -6 -5 5 1.39 0.35
 -6 -5 5 1.67 0.35
 -5 6 -5 1.74 0.54
 -5 6 5 1.32 0.33
 -5 6 5 2.29 0.36
 5 -6 -5 1.09 0.34
 6 5 -5 1.35 0.3
 6 5 5 1.58 0.26
 -6 -5 7 31.78 1.02
 -6 -5 7 41.26 0.96
 -5 6 -7 39.96 1.5
 -5 6 7 37.27 0.91
 5 -6 -7 34.77 1.05
 6 5 -7 35.09 0.68
 6 5 7 32.34 0.67
 -6 -5 9 73.82 1.48
 -6 -5 9 83.81 1.32
 -5 6 -9 71.04 1.95
 -5 6 9 82.16 1.33
 -5 6 9 86.51 1.37
 5 -6 -9 79.67 1.51
 6 5 9 53.32 0.82
 6 5 9 57.74 0.85
 -6 -5 11 19.64 0.72
 -5 6 -11 21.48 1.18
 -5 6 11 17.89 0.83
 -5 6 11 17.98 0.69
 -5 6 11 19.71 0.73
 5 -6 -11 17.15 0.67
 6 5 11 13.9 0.5
 -6 -6 0 362.83 2.73
 -6 6 0 407.58 3.45
 -6 6 0 471.27 4.39
 -6 6 0 426.93 2.24
 6 -6 0 428.36 3.25
 6 -6 0 266.16 2.52
 6 6 0 214.61 2.16
 6 6 0 304.97 2.21
 -6 -6 -2 13.8 0.59
 -6 -6 2 18.08 0.84
 -6 -6 2 15.76 0.66
 -6 6 -2 12.56 0.67
 -6 6 -2 17.37 1.05
 -6 6 2 15.41 0.67
 6 -6 -2 16.03 0.76
 6 -6 -2 12.73 0.69
 6 -6 2 20.73 0.75
 6 -6 2 13.85 0.73
 6 6 -2 12.11 0.6
 6 6 -2 17.23 0.67
 6 6 2 19.22 0.64
 -6 -6 -4 269.49 2
 -6 -6 4 240.18 2.62
 -6 -6 4 306.18 2.39
 -6 6 -4 289.86 3.57
 -6 6 4 283.35 2.4
 -6 6 4 231.4 2.12
 6 -6 -4 219.16 2.51
 6 -6 -4 282.46 2.48
 6 -6 4 249 1.42
 6 6 -4 241.48 2.22
 6 6 4 316.18 2.11
 -6 -6 6 149.54 2.05
 -6 -6 6 241.28 2.2
 -6 6 -6 194.66 3.09
 -6 6 6 178.21 1.85
 6 -6 -6 174.47 2.26
 6 6 -6 214.61 1.92
 6 6 6 180.69 1.59
 -6 -6 8 187.96 2.35
 -6 -6 8 226.44 2.14
 -6 6 -8 210.66 3.34
 -6 6 8 196.96 2.4
 -6 6 8 198.82 2.05
 -6 6 8 207.7 2.09
 6 -6 -8 210.25 2.48
 6 6 8 176.68 1.62
 -6 -6 10 61.25 1.17
 -6 6 -10 62.29 1.98
 -6 6 10 54.16 1.32
 -6 6 10 55.61 1.11
 -6 6 10 57.64 1.13
 6 -6 -10 53.01 1.18
 6 6 10 37.9 0.78
 -7 6 -1 353.02 2.91
 -7 6 -1 578.59 4.9
 -7 6 1 631.46 4.53
 -7 6 1 614.27 4.54
 -7 6 1 658.42 3.79
 -6 -7 -1 415.13 2.92
 -6 -7 1 484.21 3.4
 6 7 -1 423.99 3.08
 6 7 -1 514.51 3.01
 6 7 1 557.3 3.04
 7 -6 -1 456.27 3.67
 7 -6 -1 358.39 2.96
 7 -6 1 578.9 3.93
 7 -6 1 417.46 3.18
 -7 6 -3 313.8 3.8
 -7 6 3 260.87 2.76
 -7 6 3 286.25 2.4
 -6 -7 -3 289.99 2.36
 -6 -7 3 315 3.05
 -6 -7 3 345.73 2.56
 6 7 -3 281.74 2.48
 6 7 3 402.4 2.65
 7 -6 -3 265.63 2.87
 7 -6 -3 284.27 2.57
 7 -6 3 246.21 1.93
 -7 6 -5 401.85 4.51
 -7 6 5 320.37 3.06
 -7 6 5 404.42 2.84
 -6 -7 -5 437.77 2.67
 -6 -7 5 323.51 3.07
 -6 -7 5 532.51 3.33
 6 7 -5 431.36 3.01
 6 7 5 385.14 2.49
 7 -6 -5 360.06 3.37
 -7 6 -7 204.47 3.38
 -7 6 7 194.62 2.4
 -6 -7 7 159.39 2.18
 -6 -7 7 233.36 2.23
 6 7 -7 219.59 1.51
 6 7 7 178.91 1.72
 7 -6 -7 194.6 2.5
 -7 6 -9 281.7 4.07
 -7 6 9 253.74 2.77
 -7 6 9 266.3 2.33
 -6 -7 9 213 2.56
 -6 -7 9 293.89 2.5
 6 7 9 201.42 1.88
 7 -6 -9 249.93 2.69
 -7 6 -11 44.6 1.72
 -7 6 11 32.37 1.04
 -6 -7 11 40.24 0.99
 6 7 11 26.31 0.72
 7 -6 -11 33.27 0.93
 -7 5 0 2.53 0.43
 -5 -7 0 2.06 0.36
 5 7 0 1.9 0.37
 7 -5 0 2.25 0.44
 -7 5 -2 4.35 0.72
 -7 5 2 5.55 0.66
 -7 5 2 2.67 0.41
 -5 -7 2 3.32 0.45
 5 7 -2 1.67 0.37
 5 7 -2 3.61 0.43
 5 7 2 4.01 0.43
 7 -5 -2 2.73 0.49
 7 -5 -2 2.77 0.41
 7 -5 2 4.89 0.48
 -7 5 -4 47.7 1.68
 -7 5 4 43.24 1.21
 -7 5 4 45.32 1
 -5 -7 -4 41.93 0.9
 -5 -7 4 41.66 1.18
 -5 -7 4 51.28 1.21
 5 7 -4 39.58 1.01
 5 7 4 48.61 0.93
 7 -5 -4 41.32 1.27
 7 -5 -4 39.46 0.97
 -7 5 -6 27.71 1.4
 -7 5 6 27.16 0.97
 -7 5 6 25.59 0.78
 -7 5 6 27.35 0.81
 -5 -7 -6 23.8 0.65
 -5 -7 6 20.05 0.83
 -5 -7 6 27.73 0.92
 5 7 -6 29.43 0.72
 5 7 6 24.55 0.68
 7 -5 -6 27.41 1.04
 -7 5 -8 99.4 2.49
 -7 5 8 90.98 1.66
 -7 5 8 91.45 1.39
 -7 5 8 95.99 1.43
 -5 -7 8 72.03 1.48
 -5 -7 8 100.49 1.56
 5 7 8 76.4 1.18
 7 -5 -8 99.63 1.8
 -7 5 -10 28.24 1.42
 -7 5 10 20.66 0.83
 -7 5 10 22.29 0.76
 -5 -7 10 25.88 0.84
 5 7 10 15.73 0.57
 7 -5 -10 20.76 0.79
 7 -5 -10 18.69 0.4
 -7 4 -1 333.56 2.72
 -7 4 -1 319.82 3.37
 -7 4 1 235.58 2.51
 -7 4 1 298.56 2.62
 -7 4 1 344.37 2.37
 -4 -7 -1 286.47 2.51
 -4 -7 1 295.57 2.55
 -4 -7 1 294.42 2.57
 4 7 -1 277.21 2.85
 4 7 -1 311.54 2.22
 4 7 1 357.16 3.64
 4 7 1 334.75 2.28
 7 -4 -1 248.71 2.64
 7 -4 -1 341.66 3.13
 7 -4 1 298.4 2.7
 7 -4 1 379.82 2.77
 -7 4 -3 242.34 3.28
 -7 4 3 251.12 2.84
 -7 4 3 215.37 2.2
 -4 -7 -3 239.21 2.09
 -4 -7 3 219.15 2.4
 -4 -7 3 211.16 2.4
 4 7 -3 166.5 2.02
 4 7 3 280.88 2.12
 7 -4 -3 219.96 2.66
 7 -4 -3 179.74 1.98
 -7 4 -5 449.08 4.83
 -7 4 5 488.7 3.88
 -7 4 5 521.1 3.25
 -7 4 5 435.97 2.87
 -7 4 5 477.74 3.01
 -4 -7 -5 471.98 2.88
 -4 -7 5 358.8 3.19
 -4 -7 5 404.15 3.28
 4 7 -5 356.61 2.64
 4 7 -5 493.81 2.89
 4 7 5 417.11 2.58
 7 -4 -5 469.88 3.99
 7 -4 -5 422.53 2.78
 -7 4 -7 250.93 3.84
 -7 4 7 252.08 2.28
 -4 -7 7 173.35 2.19
 -4 -7 7 266.87 2.64
 4 7 7 191.8 1.82
 7 -4 -7 269.82 3.07
 -7 4 -9 373.71 4.64
 -7 4 9 323.4 2.99
 -7 4 9 304.4 2.51
 -4 -7 9 383.01 3.13
 4 7 9 211 1.84
 7 -4 -9 323.83 2.92
 -7 4 -11 213.78 3.41
 -7 4 11 187.47 2.28
 -7 4 11 200.27 2.07
 -4 -7 11 232.46 2.31
 4 7 11 119.51 1.41
 7 -4 -11 168.89 1.89
 -7 3 0 3.22 0.51
 -7 3 0 1.84 0.39
 -3 -7 0 0.79 0.29
 -3 -7 0 0.67 0.34
 3 7 0 1.29 0.43
 3 7 0 1.3 0.27
 7 -3 0 0.99 0.34
 7 -3 0 2.09 0.43
 -7 3 -2 852.16 2.78
 -7 3 -2 740.14 5.17
 -7 3 2 527.47 3.76
 -7 3 2 681.5 3.13
 -7 3 2 727.35 4.03
 -3 -7 -2 752.23 3.73
 -3 -7 2 666.46 3.8
 -3 -7 2 560.44 3.94
 3 7 -2 450 3.49
 3 7 -2 767.79 3.42
 3 7 2 674.11 4.73
 3 7 2 859.73 3.65
 7 -3 -2 597.95 4.24
 7 -3 -2 857.45 4.76
 7 -3 2 570.76 3.43
 7 -3 2 847.8 2.72
 -7 3 -4 74.68 2.02
 -7 3 4 79.77 1.6
 -7 3 4 81.6 1.39
 -7 3 4 70.25 1.18
 -7 3 4 73.37 1.21
 -3 -7 -4 67.18 1.13
 -3 -7 4 79.19 1.51
 -3 -7 4 68.33 1.58
 3 7 -4 74.34 1.32
 3 7 -4 75.79 1.26
 3 7 4 75.97 1.13
 7 -3 -4 72.04 1.61
 7 -3 -4 64.72 1.17
 -7 3 -6 628.44 5.92
 -7 3 6 623.52 4.4
 -7 3 6 563.89 3.4
 -7 3 6 618.28 3.65
 -3 -7 -6 420.56 2.65
 -3 -7 6 476.52 3.58
 -3 -7 6 370.58 3.19
 3 7 -6 492.4 3.2
 3 7 6 423.12 2.67
 7 -3 -6 566.3 4.37
 -7 3 -8 88.35 2.28
 -7 3 8 73.9 1.48
 -7 3 8 73.2 1.3
 -3 -7 8 60.72 1.32
 3 7 -8 58.09 1.18
 3 7 8 51.65 0.95
 7 -3 -8 68.76 1.44
 -7 3 -10 445.5 4.8
 -7 3 10 376.24 3.21
 -7 3 10 387.87 2.93
 -3 -7 10 363.87 3.03
 3 7 10 240.12 1.98
 7 -3 -10 371.96 2.93
 -7 3 -12 37.23 1.5
 -7 3 12 33.45 0.93
 -3 -7 12 33.75 0.97
 3 7 12 24.34 0.71
 7 -3 -12 34.32 0.84
 -7 2 -1 366.84 2.57
 -7 2 -1 242.65 2.5
 -7 2 1 277.87 2.92
 -7 2 1 232.6 1.81
 -7 2 1 308.1 2.08
 -2 -7 -1 226.1 2.09
 -2 -7 -1 174.03 1.97
 -2 -7 1 254.94 2.41
 -2 -7 1 242.47 2.46
 2 7 -1 223.05 2.49
 2 7 -1 274.29 1.98
 2 7 1 240.36 2.68
 2 7 1 331.87 2.26
 7 -2 -1 226.49 2.61
 7 -2 -1 324.58 2.55
 7 -2 1 195.2 2.19
 7 -2 1 310.73 1.98
 -7 2 -3 200.22 2.98
 -7 2 3 162.01 2.12
 -7 2 3 213.64 2.31
 -7 2 3 214.94 1.95
 -7 2 3 219.58 1.97
 -2 -7 -3 190.3 1.87
 -2 -7 -3 134.27 1.69
 -2 -7 3 211.99 2.19
 -2 -7 3 233.24 2.64
 2 7 -3 264.62 2
 2 7 -3 177 1.97
 2 7 3 202.89 2.44
 2 7 3 232.06 1.92
 7 -2 -3 196.85 2.61
 7 -2 -3 213.65 2.23
 -7 2 -5 7.76 0.96
 -7 2 5 10.37 0.7
 -7 2 5 8.65 0.6
 -7 2 5 8.34 0.63
 -2 -7 -5 8.96 0.52
 -2 -7 5 7.02 0.62
 -2 -7 5 8.09 0.72
 2 7 -5 6.49 0.51
 2 7 5 7.19 0.48
 7 -2 -5 8.33 0.71
 7 -2 -5 7.66 0.49
 -7 2 -7 285.53 3.85
 -7 2 7 288.32 3.02
 -7 2 7 258.69 2.47
 -2 -7 -7 192.57 1.78
 -2 -7 7 238.83 2.53
 2 7 -7 211.53 2.22
 2 7 7 150.51 1.57
 7 -2 -7 221.39 2.48
 -7 2 -9 58.6 1.81
 -7 2 9 53.94 1.28
 -7 2 9 46.37 1.12
 -2 -7 9 37.07 1.07
 2 7 -9 40.35 1.09
 2 7 9 32.2 0.78
 7 -2 -9 48.28 1.14
 7 -2 -9 38.58 0.63
 -7 2 -11 163 2.8
 -7 2 11 139.24 1.98
 -7 2 11 145.28 1.87
 -2 -7 11 128.55 1.83
 2 7 11 104.72 1.38
 7 -2 -11 149.88 1.74
 -7 1 0 3.83 0.48
 -1 -7 0 4.89 0.55
 1 7 0 2.58 0.41
 7 -1 0 3.71 0.53
 -7 1 -2 121.45 0.98
 -7 1 -2 99.61 1.94
 -7 1 2 103.81 1.9
 -7 1 2 112.11 0.9
 -7 1 2 102.03 1.37
 -7 1 2 92.3 1.2
 -7 1 2 96.78 1.24
 -1 -7 -2 98.05 1.36
 -1 -7 -2 85.52 1.36
 -1 -7 2 103.61 1.55
 -1 -7 2 101.09 1.67
 1 7 -2 120.14 1.37
 1 7 -2 68.9 1.23
 1 7 2 100.37 1.73
 1 7 2 118.93 1.36
 7 -1 -2 91.36 1.83
 7 -1 -2 116.71 1.55
 7 -1 2 87.17 1.52
 7 -1 2 90.27 0.71
 7 -1 2 105.26 0.82
 -7 1 -4 36.51 1.47
 -7 1 4 22.44 0.86
 -7 1 4 31.17 0.97
 -7 1 4 42.7 1.16
 -1 -7 -4 32.08 0.86
 -1 -7 -4 22.43 0.74
 -1 -7 4 30.08 0.89
 -1 -7 4 34.64 1.09
 1 7 -4 27.74 0.93
 1 7 -4 28.88 0.46
 1 7 -4 38.83 0.68
 1 7 4 34.44 0.84
 7 -1 -4 25.66 0.98
 7 -1 -4 27.95 0.78
 -7 1 -6 110.96 2.41
 -7 1 6 102.01 1.77
 -7 1 6 104.94 1.64
 -1 -7 -6 80.89 1.28
 -1 -7 6 97.9 1.67
 -1 -7 6 107.2 1.65
 1 7 -6 88.51 1.51
 1 7 6 77.84 1.18
 7 -1 -6 77.37 1.47
 -7 1 -8 40.27 1.51
 -7 1 8 40.47 1.16
 -7 1 8 31.89 0.97
 -1 -7 -8 30.91 0.77
 -1 -7 8 34.22 0.98
 1 7 -8 29.91 0.97
 1 7 8 24.93 0.7
 7 -1 -8 27.06 0.88
 7 -1 -8 23.22 0.57
 -7 1 -10 112.25 2.33
 -7 1 10 96.66 1.72
 -7 1 10 92.72 1.53
 -1 -7 10 86.44 1.54
 1 7 -10 77.07 1.52
 1 7 10 76.9 1.2
 1 7 10 84.31 1.26
 7 -1 -10 102.3 1.52
 -7 1 -12 12.2 0.97
 -7 1 12 11.95 0.68
 -1 -7 12 11.49 0.69
 1 7 12 10.07 0.55
 1 7 12 10.72 0.57
 -7 0 -1 171.92 1.65
 -7 0 -1 179.25 2.25
 -7 0 1 163.88 2.03
 -7 0 1 180.41 1.37
 0 -7 -1 147.4 1.9
 0 -7 1 120.89 1.53
 0 -7 1 145.15 1.88
 0 7 -1 122.32 1.6
 0 7 -1 173.32 1.46
 0 7 1 135.51 1.87
 0 7 1 188.63 1.68
 7 0 -1 119.97 1.89
 7 0 -1 185.49 1.84
 7 0 1 132.88 2
 7 0 1 163.79 1.41
 -7 0 -3 244.24 3.25
 -7 0 3 237.37 2.83
 -7 0 3 205.71 2.08
 -7 0 3 330.58 2.96
 0 -7 -3 223.08 2.09
 0 -7 -3 222.51 2.09
 0 -7 3 202.8 2.15
 0 -7 3 227.45 2.32
 0 7 -3 228.45 1.34
 0 7 -3 222.06 1.64
 0 7 3 206.81 2.41
 0 7 3 225.68 1.94
 7 0 -3 172.39 2.2
 7 0 -3 183.85 1.88
 -7 0 -5 46.22 1.65
 -7 0 5 37.09 1.1
 -7 0 5 44.49 1.1
 -7 0 5 42.09 1.12
 0 -7 -5 38.4 0.94
 0 -7 5 43.96 1.05
 0 -7 5 49.65 1.11
 0 7 -5 39.3 1.08
 0 7 5 37.96 0.9
 7 0 -5 35.96 1.05
 7 0 -5 32.64 0.76
 -7 0 -7 220.37 3.22
 -7 0 7 199.51 2.42
 -7 0 7 196.07 2.21
 0 -7 -7 177.04 1.85
 0 -7 7 247.44 2.27
 0 7 -7 162.8 2.13
 0 7 7 147.21 1.57
 7 0 -7 210.37 2.26
 -7 0 -9 9.79 0.85
 -7 0 9 10.34 0.69
 -7 0 9 10.16 0.67
 0 -7 -9 9.95 0.54
 0 -7 9 11.07 0.64
 0 7 -9 7.38 0.64
 0 7 9 7.72 0.48
 7 0 -9 9.91 0.58
 7 0 -9 8.5 0.3
 -7 0 -11 62.67 1.73
 -7 0 11 66.1 1.46
 -7 0 11 59.19 1.22
 0 -7 11 60.37 1.28
 0 7 -11 58.87 1.45
 0 7 11 59.3 1.12
 0 7 11 63.05 1.16
 -7 -1 0 5.23 0.5
 -1 7 0 0.94 0.32
 -1 7 0 1.74 0.25
 1 -7 0 1.2 0.28
 1 -7 0 1.03 0.37
 7 1 0 1.86 0.5
 7 1 0 1.96 0.31
 -7 -1 -2 2177.95 8.35
 -7 -1 -2 1842.75 7.48
 -7 -1 2 1816.66 6.84
 -7 -1 2 2103.68 8.56
 -7 -1 2 2953.7 11.61
 -1 7 -2 1971.6 6.54
 -1 7 -2 1379.18 4.72
 -1 7 2 1660.47 6.65
 -1 7 2 1942.38 7.47
 1 -7 -2 2049.28 11.06
 1 -7 -2 2120.82 10.78
 1 -7 2 1837.46 5.77
 1 -7 2 1856.87 10.78
 7 1 -2 1668.31 6.94
 7 1 -2 1978.94 6.61
 7 1 2 1556.75 6.65
 7 1 2 2129.43 7.82
 -7 -1 -4 2.5 0.71
 -7 -1 4 2.43 0.5
 -7 -1 4 1.87 0.38
 -7 -1 4 2.7 0.46
 -1 7 -4 0.71 0.38
 -1 7 4 1.79 0.43
 -1 7 4 4.03 0.47
 1 -7 -4 1.5 0.35
 1 -7 4 2.67 0.41
 1 -7 4 2.99 0.43
 7 1 -4 1.5 0.35
 7 1 -4 2.01 0.35
 -7 -1 -6 1425.67 8.41
 -7 -1 6 1165.76 5.83
 -7 -1 6 867.5 4.58
 -1 7 -6 1256.69 5.98
 -1 7 6 850.94 3.79
 1 -7 -6 1023.22 4.61
 1 -7 6 1339.95 4.86
 7 1 -6 1316.09 5.63
 -7 -1 -8 1.09 0.55
 -7 -1 8 0.65 0.35
 -7 -1 8 1.39 0.43
 -1 7 -8 1.37 0.42
 -1 7 8 0.83 0.28
 1 -7 -8 2.61 0.37
 1 -7 8 0.79 0.31
 7 1 -8 2.83 0.4
 7 1 -8 0.24 0.15
 -7 -1 -10 721.32 5.56
 -7 -1 10 723.8 4.61
 -7 -1 10 537.73 3.47
 -1 7 -10 517.17 4.16
 -1 7 10 654.36 3.54
 -1 7 10 670.56 3.59
 1 -7 10 634.35 3.45
 -7 -1 12 0.22 0.31
 -1 7 -12 1.11 0.5
 -1 7 12 0.19 0.28
 -1 7 12 0.34 0.31
 1 -7 12 0.32 0.39
 -7 -2 -1 1044.56 3.99
 -7 -2 1 880.2 4.6
 -7 -2 1 1227.09 4.87
 -2 7 -1 410.35 2.46
 -2 7 1 590.64 3.78
 -2 7 1 1064.82 3.91
 2 -7 -1 835.74 4.09
 2 -7 -1 962.42 4.85
 2 -7 1 861.07 3.95
 2 -7 1 852.82 4.38
 7 2 -1 1052.36 6.52
 7 2 -1 1000.78 4.09
 7 2 1 673.87 4.6
 7 2 1 735.75 2.93
 -7 -2 -3 584.6 1.9
 -7 -2 -3 482.74 4.22
 -7 -2 3 441.72 3.44
 -7 -2 3 493.67 3.04
 -7 -2 3 380.06 2.99
 -2 7 3 526.78 3.91
 -2 7 3 586.74 3.26
 2 -7 -3 528.37 3.43
 2 -7 -3 645.5 3.91
 2 -7 3 465.52 2.83
 2 -7 3 577.38 3.4
 7 2 -3 534.98 4.02
 7 2 -3 557.82 3.13
 7 2 3 470.66 3.51
 7 2 3 585.03 1.94
 -7 -2 -5 921.58 6.94
 -7 -2 5 652.37 4.62
 -7 -2 5 673.1 3.93
 -7 -2 5 464.86 3.16
 -2 7 -5 792.83 4.94
 -2 7 5 567.76 3.21
 2 -7 -5 600.37 3.69
 2 -7 5 867.67 3.81
 7 2 -5 753.3 4.44
 -7 -2 -7 283.95 3.95
 -7 -2 7 209.39 2.54
 -7 -2 7 214.8 2.18
 -2 7 -7 227.79 2.73
 -2 7 7 194.01 1.86
 2 -7 -7 170.4 1.95
 2 -7 7 274.64 1.98
 7 2 -7 250.44 2.47
 7 2 -7 205.38 1.65
 -7 -2 9 567.36 4.13
 -7 -2 9 509.32 3.23
 -2 7 -9 521.5 4.26
 -2 7 9 473.71 3
 -2 7 9 503.54 3.09
 2 -7 -9 581.77 3.53
 2 -7 9 648.9 3.1
 7 2 -9 623.94 1.96
 -7 -2 11 135.45 1.69
 -2 7 -11 159.5 2.48
 -2 7 11 167.91 1.89
 -2 7 11 177.33 1.94
 2 -7 11 180.43 1.78
 -7 -3 0 1.8 0.37
 -3 7 0 1.38 0.3
 3 -7 0 2.37 0.36
 3 -7 0 1.61 0.4
 7 3 0 1.57 0.49
 7 3 0 2.58 0.32
 -7 -3 -2 13.47 0.49
 -7 -3 2 11.35 0.66
 -7 -3 2 7.67 0.58
 -3 7 2 8.3 0.54
 -3 7 2 15.71 0.59
 3 -7 -2 14.37 0.69
 3 -7 -2 11.69 0.71
 3 -7 2 12.63 0.53
 3 -7 2 11.74 0.62
 7 3 -2 14.45 0.95
 7 3 -2 15.16 0.63
 7 3 2 15.29 0.5
 -7 -3 4 23.99 0.89
 -7 -3 4 28.09 0.85
 -7 -3 4 15.56 0.65
 -3 7 -4 29.02 1.13
 -3 7 4 30.25 1.03
 -3 7 4 28.31 0.86
 3 -7 -4 28.16 0.88
 3 -7 -4 35.53 1
 3 -7 4 32.63 0.86
 7 3 -4 36.81 1.26
 7 3 -4 19.49 0.72
 7 3 -4 28.75 0.77
 7 3 4 32.95 0.52
 -7 -3 6 4.89 0.53
 -7 -3 6 3.83 0.45
 -3 7 -6 5.49 0.63
 -3 7 6 4.82 0.44
 3 -7 -6 4.72 0.48
 3 -7 6 6.09 0.44
 7 3 -6 3.24 0.33
 -7 -3 8 88.66 1.65
 -7 -3 8 79.1 1.26
 -3 7 -8 82.31 1.8
 -3 7 8 79.36 1.26
 3 -7 -8 82.31 1.43
 7 3 -8 83.79 0.91
 -7 -3 10 17.84 0.82
 -7 -3 10 16.26 0.65
 -3 7 -10 16.8 0.92
 -3 7 10 19.29 0.73
 -3 7 10 20.71 0.74
 3 -7 -10 19.94 0.77
 3 -7 10 21.59 0.57
 -7 -3 12 74.75 1.25
 -3 7 -12 92.49 1.99
 -3 7 12 85.54 1.35
 -3 7 12 88.2 1.38
 -7 -4 -1 71.67 1.12
 -7 -4 1 91.01 1.68
 -4 7 -1 79.75 0.77
 -4 7 -1 87.15 0.97
 -4 7 1 64.38 1.16
 4 -7 -1 93.69 1.55
 4 -7 -1 60.8 1.3
 4 -7 1 83.29 1.34
 4 -7 1 57.59 1.21
 7 4 -1 86.28 1.28
 7 4 1 73.73 1.05
 -7 -4 -3 206.49 1.6
 -7 -4 3 179.5 2.18
 -7 -4 3 126.41 1.51
 -4 7 -3 229.79 2.99
 -4 7 3 130.68 1.68
 -4 7 3 221.73 2.1
 4 -7 -3 203.42 2.27
 4 -7 -3 242.61 2.51
 4 -7 3 184.09 1.73
 4 -7 3 175.52 1.93
 7 4 -3 160.65 1.97
 7 4 -3 236.94 2.12
 7 4 3 226.1 1.64
 -7 -4 5 18.07 0.77
 -7 -4 5 22.78 0.72
 -4 7 -5 25.96 1.13
 -4 7 5 18.44 0.77
 -4 7 5 21.6 0.73
 4 -7 -5 20.51 0.8
 4 -7 5 18.62 0.56
 7 4 -5 16.87 0.59
 7 4 5 26.54 0.54
 -7 -4 7 135.51 2.03
 -7 -4 7 146.81 1.66
 -4 7 -7 150.77 2.5
 -4 7 7 131.44 1.59
 4 -7 -7 136.9 1.87
 7 4 -7 123.57 1.25
 7 4 7 132.52 1.07
 -7 -4 9 21.12 0.86
 -7 -4 9 22.24 0.72
 -4 7 -9 22 1.08
 -4 7 9 25.81 0.8
 4 -7 -9 23.29 0.85
 7 4 9 16.88 0.44
 -7 -4 11 84.73 1.3
 -4 7 -11 92.22 2.06
 -4 7 11 83.08 1.33
 -4 7 11 88.35 1.38
 4 -7 -11 87.48 1.34
 -7 -5 0 0.95 0.31
 -5 7 0 0.43 0.35
 5 -7 0 0.96 0.38
 5 -7 0 -0.03 0.36
 7 5 0 1.03 0.28
 -7 -5 -2 349.53 2.39
 -7 -5 2 402.71 3.61
 -7 -5 2 251.67 2.03
 -5 7 -2 461.19 4.54
 -5 7 2 300.22 2.47
 5 -7 -2 357.42 3.07
 5 -7 -2 384.95 3.26
 5 -7 2 394.55 2.74
 5 -7 2 304.47 2.75
 7 5 -2 309.23 2.78
 7 5 -2 431.32 2.94
 7 5 2 449.84 2.57
 -7 -5 -4 4.21 0.34
 -7 -5 4 2.36 0.4
 -7 -5 4 2.66 0.36
 -5 7 -4 3.99 0.71
 -5 7 4 2.15 0.36
 -5 7 4 2.86 0.4
 5 -7 -4 3.96 0.49
 5 -7 -4 4.46 0.54
 5 -7 4 2.27 0.35
 7 5 -4 1.84 0.32
 7 5 4 3.93 0.37
 -7 -5 6 261.22 2.71
 -7 -5 6 426.89 2.79
 -5 7 -6 378.59 4.12
 -5 7 6 324.91 2.47
 5 -7 -6 302.97 2.86
 7 5 -6 307.2 2.2
 7 5 6 330.51 1.96
 -7 -5 8 0.97 0.36
 -7 -5 8 0.51 0.29
 -5 7 -8 0.41 0.52
 -5 7 8 0.84 0.3
 5 -7 -8 0.81 0.35
 7 5 -8 0.79 0.18
 7 5 8 0.96 0.24
 -7 -5 10 264.93 2.76
 -7 -5 10 351.47 2.59
 -5 7 -10 307.34 3.84
 -5 7 10 368.56 2.74
 5 -7 -10 354.72 2.96
 7 5 10 248.6 1.74
 -7 -6 -1 242.05 2.16
 -7 -6 1 266.79 2.59
 -6 7 -1 290.09 2.86
 -6 7 -1 329.43 3.97
 -6 7 1 298.22 2.54
 6 -7 -1 269.24 2.74
 6 -7 -1 236.3 2.59
 6 -7 1 318.42 2.88
 6 -7 1 188.99 2.4
 7 6 -1 177.66 2.02
 7 6 -1 269.28 2.22
 7 6 1 236.59 1.97
 -7 -6 -3 183.43 1.8
 -7 -6 3 174.16 2.33
 -7 -6 3 183.8 1.78
 -6 7 -3 201.93 3.05
 -6 7 3 168.61 1.83
 6 -7 -3 149.65 2.1
 6 -7 -3 193.52 2.24
 6 -7 3 135.77 1.71
 7 6 -3 162.24 1.9
 7 6 -3 195.76 2.04
 7 6 3 240.52 1.99
 -7 -6 -5 132.63 1.32
 -7 -6 5 96.59 1.68
 -7 -6 5 145.49 1.67
 -6 7 -5 111.03 2.35
 -6 7 5 121.42 1.68
 6 -7 -5 104.27 1.77
 6 -7 5 93.49 1.08
 7 6 -5 104.89 1.4
 7 6 5 132.19 1.39
 -7 -6 7 189.85 2.37
 -7 -6 7 289.17 2.38
 -6 7 -7 239.77 3.49
 -6 7 7 239.92 2.18
 6 -7 -7 205.6 2.45
 7 6 -7 226.08 1.72
 7 6 7 206.18 1.71
 -7 -6 9 170.14 2.28
 -7 -6 9 222.87 2.1
 -6 7 -9 167.38 3.03
 -6 7 9 174.52 2.3
 -6 7 9 197.61 2.04
 6 -7 -9 186.11 2.32
 7 6 9 160.28 1.56
 -7 -6 11 200.16 2
 -6 7 -11 200.46 3.27
 -6 7 11 159.84 2.21
 -6 7 11 174.16 1.9
 6 -7 -11 176.03 2.01
 7 6 11 133.8 1.44
 -7 -7 0 1.41 0.33
 -7 7 0 1.28 0.44
 -7 7 0 1.75 0.68
 7 -7 0 0.94 0.41
 7 -7 0 -0.19 0.34
 7 7 0 1.26 0.3
 -7 -7 -2 209.95 2.04
 -7 -7 2 263.33 2.76
 -7 7 -2 216.25 2.27
 -7 7 -2 253.22 3.45
 -7 7 2 224.14 2.51
 -7 7 2 258.16 2.36
 7 -7 -2 207.22 2.53
 7 -7 -2 214.78 2.37
 7 -7 2 147.44 1.83
 7 7 -2 220.76 2.22
 7 7 -2 231.66 2.15
 7 7 2 282.63 2.23
 -7 -7 -4 1.82 0.34
 -7 -7 4 1.09 0.36
 -7 -7 4 0.95 0.32
 -7 7 -4 0.77 0.58
 -7 7 4 0.47 0.35
 -7 7 4 1.69 0.3
 7 -7 -4 0.74 0.36
 7 -7 -4 1.16 0.36
 7 -7 4 0.39 0.3
 7 7 -4 0.65 0.26
 7 7 4 1.32 0.32
 -7 -7 6 208.2 2.5
 -7 -7 6 342.6 2.63
 -7 7 -6 260.36 3.7
 -7 7 6 242.48 2.67
 -7 7 6 240.8 2.28
 7 -7 -6 228.55 2.67
 7 7 -6 276.57 2.16
 7 7 6 289.2 2.2
 -7 -7 8 4.7 0.5
 -7 -7 8 7.42 0.54
 -7 7 -8 6.42 0.88
 -7 7 8 5.34 0.54
 7 -7 -8 5.5 0.61
 7 7 -8 6.29 0.27
 7 7 8 5.51 0.43
 -7 -7 10 245.73 2.26
 -7 7 -10 226.89 3.65
 -7 7 10 203.55 2.52
 7 -7 -10 207.36 2.37
 7 7 10 167.71 1.73
 -8 7 -1 13.23 0.7
 -8 7 -1 19.89 1.11
 -8 7 1 20.8 0.91
 -8 7 1 21.8 1.02
 -8 7 1 21.93 0.74
 -7 -8 -1 16.06 0.68
 -7 -8 1 19 0.77
 7 8 -1 20.15 0.71
 7 8 1 20.01 0.68
 8 -7 -1 18.03 0.86
 8 -7 -1 14.92 0.75
 8 -7 1 20.85 0.95
 8 -7 1 11.49 0.65
 -8 7 -3 1.35 0.62
 -8 7 3 1.76 0.44
 -8 7 3 1.67 0.32
 -7 -8 -3 1.86 0.35
 -7 -8 3 1.86 0.4
 7 8 -3 1.8 0.34
 7 8 3 2.4 0.39
 8 -7 -3 2.09 0.47
 8 -7 -3 1.8 0.4
 8 -7 3 1.28 0.36
 -8 7 -5 9.56 0.96
 -8 7 5 9.16 0.68
 -8 7 5 9.68 0.56
 -7 -8 -5 13.16 0.62
 -7 -8 5 8.05 0.63
 -7 -8 5 12.54 0.65
 7 8 -5 9.11 0.52
 7 8 5 12.96 0.61
 8 -7 -5 10.27 0.75
 8 -7 5 9.27 0.48
 -8 7 -7 16.22 1.25
 -8 7 7 13.65 0.78
 -7 -8 7 10.17 0.65
 -7 -8 7 17.45 0.73
 7 8 -7 14.3 0.48
 7 8 7 14.96 0.63
 8 -7 -7 12.65 0.79
 -8 7 -9 23.99 1.43
 -8 7 9 23.52 0.94
 -7 -8 9 18.65 0.87
 -7 -8 9 28.16 0.86
 7 8 9 22.61 0.73
 8 -7 -9 23.67 0.97
 -8 6 0 838.78 4.78
 -8 6 0 851.14 5.27
 -6 -8 0 764.81 4.21
 6 8 0 907.39 4.01
 8 -6 0 849.91 5.22
 8 -6 0 754.52 4.49
 -8 6 -2 2.44 0.4
 -8 6 -2 1.73 0.62
 -8 6 2 1.69 0.43
 -8 6 2 1.1 0.39
 -8 6 2 1.42 0.41
 -6 -8 -2 3.41 0.43
 -6 -8 2 1.3 0.38
 -6 -8 2 1.78 0.35
 6 8 -2 1.37 0.32
 6 8 2 2.54 0.36
 8 -6 -2 1.61 0.47
 8 -6 -2 1.25 0.39
 8 -6 2 2.06 0.42
 -8 6 -4 846.95 6.71
 -8 6 4 892.56 5.15
 -8 6 4 923.62 4.26
 -6 -8 -4 857.35 4.15
 -6 -8 4 856.26 4.92
 -6 -8 4 1027.73 4.7
 6 8 -4 768.37 4.13
 6 8 4 879.85 4.05
 8 -6 -4 803.21 5.24
 8 -6 -4 838.48 4.33
 8 -6 4 890.21 3.25
 -8 6 -6 0.74 0.62
 -8 6 6 0.64 0.34
 -8 6 6 0.6 0.28
 -6 -8 -6 0.79 0.29
 -6 -8 6 0.64 0.33
 -6 -8 6 0.42 0.33
 6 8 -6 0.75 0.26
 6 8 6 0.63 0.3
 8 -6 -6 0.07 0.38
 -8 6 -8 472.29 5.42
 -8 6 8 457.47 3.63
 -6 -8 8 398.86 3.47
 -6 -8 8 588 3.62
 6 8 8 403.85 2.75
 8 -6 -8 492.44 4.04
 -8 6 -10 10.97 1.15
 -8 6 10 10.14 0.66
 -6 -8 10 10.91 0.65
 6 8 10 8.71 0.52
 8 -6 -10 9.42 0.63
 -8 5 -1 425.01 3.27
 -8 5 -1 364.61 3.62
 -8 5 1 376.6 3.26
 -8 5 1 353.54 2.98
 -8 5 1 446.39 2.58
 -5 -8 -1 323.41 2.7
 -5 -8 1 354.74 2.93
 -5 -8 1 413.29 2.81
 5 8 -1 363.07 3.13
 5 8 -1 392.46 2.61
 5 8 1 439.07 2.75
 8 -5 -1 351.01 3.33
 8 -5 -1 353.01 3.08
 8 -5 1 380.95 3.3
 8 -5 1 354.01 2.9
 -8 5 -3 554.63 5.31
 -8 5 3 620.79 4.36
 -8 5 3 589.14 3.68
 -5 -8 -3 501.02 3.25
 -5 -8 3 481.62 3.61
 -5 -8 3 706.64 4.32
 5 8 -3 489.13 3.54
 5 8 3 730.9 3.7
 8 -5 -3 536.52 4.32
 8 -5 -3 483.22 3.37
 8 -5 3 647.44 2.93
 -8 5 -5 277.9 4.04
 -8 5 5 253.67 2.76
 -8 5 5 298.25 2.46
 -5 -8 -5 284.83 2.36
 -5 -8 5 242.61 2.64
 -5 -8 5 343.03 3.11
 5 8 -5 264.26 2.34
 5 8 -5 289.96 2.41
 5 8 5 256.44 2.15
 8 -5 -5 249.09 3.03
 -8 5 -7 537.02 5.83
 -8 5 7 478.67 3.7
 -5 -8 7 355.75 3.23
 -5 -8 7 602.15 3.97
 5 8 7 415.6 2.77
 8 -5 -7 472.03 4.08
 -8 5 -9 153.16 3.21
 -8 5 9 128.74 1.94
 -5 -8 9 137.45 1.85
 5 8 9 96.19 1.38
 8 -5 -9 121.86 1.88
 -8 5 -11 311.84 4.19
 -8 5 11 245.98 2.62
 -5 -8 11 267.76 2.48
 5 8 11 147.75 1.64
 8 -5 -11 242.89 2.38
 -8 4 0 81.18 1.68
 -8 4 0 69.31 1.38
 -4 -8 0 64.89 1.29
 -4 -8 0 73.57 1.29
 4 8 0 76.6 1.69
 4 8 0 78.78 1.16
 8 -4 0 69.95 1.48
 8 -4 0 108.83 1.79
 -8 4 -2 8.26 0.45
 -8 4 -2 5.82 0.71
 -8 4 2 5.49 0.58
 -8 4 2 5.89 0.5
 -8 4 2 6.36 0.62
 -4 -8 -2 6.81 0.54
 -4 -8 2 5.36 0.53
 -4 -8 2 5.61 0.65
 4 8 -2 4.14 0.51
 4 8 2 7.84 0.5
 8 -4 -2 6.21 0.67
 8 -4 -2 5.25 0.6
 8 -4 2 8.57 0.53
 -8 4 -4 29.23 1.46
 -8 4 4 30.99 1.06
 -8 4 4 26.89 0.88
 -4 -8 -4 24.24 0.77
 -4 -8 4 24.76 0.9
 -4 -8 4 26.91 1.06
 4 8 -4 26.21 0.83
 4 8 4 32.48 0.83
 8 -4 -4 28.22 1.1
 8 -4 -4 25.46 0.83
 -8 4 -6 0.97 0.65
 -8 4 6 0.51 0.34
 -8 4 6 2.82 0.39
 -4 -8 -6 0.62 0.27
 -4 -8 6 0.54 0.32
 -4 -8 6 0.86 0.42
 4 8 -6 0.77 0.33
 4 8 -6 0.97 0.16
 4 8 -6 0.82 0.19
 4 8 6 0.61 0.29
 8 -4 -6 1.16 0.44
 -8 4 -8 121.19 2.87
 -8 4 8 102.95 1.73
 -8 4 8 107.23 1.51
 -4 -8 8 103.06 1.72
 4 8 8 84.44 1.3
 8 -4 -8 103.3 1.82
 -8 4 -10 10.6 1.05
 -8 4 10 8.19 0.59
 -8 4 10 8.06 0.55
 -4 -8 10 11.5 0.7
 4 8 10 6.19 0.44
 8 -4 -10 7.62 0.58
 8 -4 -10 6.1 0.29
 -8 3 -1 340.15 2.66
 -8 3 -1 221.98 2.5
 -8 3 1 230.65 2.68
 -8 3 1 210.89 1.92
 -8 3 1 270.64 1.9
 -3 -8 -1 252.82 2.42
 -3 -8 -1 188.39 1.93
 -3 -8 1 210.91 2.24
 -3 -8 1 165.72 2.1
 3 8 -1 218.5 2.71
 3 8 -1 256.88 2.01
 3 8 1 229.23 2.87
 3 8 1 297.88 2.22
 8 -3 -1 213.09 2.62
 8 -3 -1 326.59 2.97
 8 -3 1 200.5 2.35
 8 -3 1 307.63 2.42
 -8 3 -3 219.86 3.1
 -8 3 3 197.91 2.4
 -8 3 3 187.94 2.12
 -3 -8 -3 229.66 2.19
 -3 -8 3 196.42 2.2
 -3 -8 3 203.97 2.68
 3 8 -3 211.16 2.32
 3 8 3 292.23 2.29
 8 -3 -3 226.12 2.85
 8 -3 -3 224.32 2.36
 8 -3 3 259.83 1.3
 -8 3 -5 147.25 3.01
 -8 3 5 143.64 2.17
 -8 3 5 151.93 1.92
 -3 -8 -5 131.1 1.68
 -3 -8 5 127.19 1.89
 -3 -8 5 118.52 2.02
 3 8 -5 119.8 1.71
 3 8 -5 105.17 1.05
 3 8 -5 137.31 1.32
 3 8 5 134.89 1.6
 8 -3 -5 134.15 2.29
 8 -3 -5 113.9 1.51
 -8 3 -7 328.36 4.45
 -8 3 7 275.45 2.89
 -8 3 7 264.71 2.36
 -3 -8 -7 208.69 1.92
 -3 -8 7 202.59 2.41
 -3 -8 7 223.96 2.57
 3 8 -7 212.88 2.21
 3 8 7 206.46 2.02
 8 -3 -7 255.62 2.82
 -8 3 -9 28.14 1.4
 -8 3 9 29.67 0.97
 -8 3 9 25.1 0.82
 -3 -8 9 29.46 1
 3 8 9 17.69 0.62
 8 -3 -9 27.27 0.96
 -8 3 -11 87.04 2.23
 -8 3 11 74.27 1.48
 -8 3 11 73.66 1.31
 -3 -8 11 81.64 1.55
 3 8 11 51.02 0.99
 8 -3 -11 78.09 1.34
 -8 2 0 140.26 1.97
 -8 2 0 103.58 1.51
 -2 -8 0 108.47 1.64
 -2 -8 0 97.98 1.62
 2 8 0 104.13 1.83
 2 8 0 113.64 1.33
 8 -2 0 95.45 1.78
 8 -2 0 155.53 1.79
 -8 2 -2 14.38 0.44
 -8 2 -2 11.12 0.81
 -8 2 2 10.23 0.68
 -8 2 2 12.62 0.62
 -2 -8 -2 10.41 0.58
 -2 -8 2 10.46 0.59
 -2 -8 2 9.9 0.72
 2 8 -2 9.37 0.66
 2 8 2 10.1 0.75
 2 8 2 15.23 0.62
 8 -2 -2 11.32 0.8
 8 -2 -2 11.34 0.67
 8 -2 2 13.95 0.49
 -8 2 -4 4.73 0.77
 -8 2 4 2.27 0.42
 -8 2 4 3.28 0.44
 -2 -8 -4 3.07 0.41
 -2 -8 4 3.55 0.45
 -2 -8 4 3.04 0.59
 2 8 -4 4.04 0.52
 2 8 -4 3.54 0.32
 2 8 -4 4.09 0.42
 2 8 4 2.8 0.37
 8 -2 -4 3.1 0.53
 8 -2 -4 2.34 0.38
 -8 2 -6 42.49 1.7
 -8 2 6 39.18 1.17
 -8 2 6 45.14 1.1
 -8 2 6 40.75 1.02
 -2 -8 -6 35.23 0.89
 -2 -8 6 35.07 1.03
 -2 -8 6 42.68 1.23
 2 8 -6 35.72 1.01
 2 8 6 34.98 0.88
 8 -2 -6 33.8 1.08
 -8 2 -8 113.57 2.55
 -8 2 8 113.1 1.89
 -8 2 8 120.1 1.69
 -2 -8 -8 77.11 1.17
 -2 -8 8 97.21 1.75
 2 8 -8 79.8 1.45
 2 8 8 69.42 1.14
 8 -2 -8 103.94 1.72
 -8 2 -10 103.68 2.34
 -8 2 10 92.54 1.65
 -8 2 10 96.64 1.55
 -2 -8 10 79.89 1.55
 2 8 10 60.92 1.08
 8 -2 -10 100.67 1.6
 8 -2 -10 75.8 0.72
 -8 1 -1 318.46 2.34
 -8 1 -1 298.84 2.98
 -8 1 1 352.57 3.3
 -8 1 1 339.84 2.19
 -1 -8 -1 266.56 2.39
 -1 -8 -1 231.86 2.35
 -1 -8 1 268.61 2.51
 -1 -8 1 255.3 2.62
 1 8 -1 231.85 2.45
 1 8 -1 313.19 2.1
 1 8 1 210.06 2.47
 1 8 1 363.34 2.45
 8 -1 -1 241.7 2.98
 8 -1 -1 353.04 2.66
 8 -1 1 228.2 2.76
 8 -1 1 336.58 2.21
 -8 1 -3 282.9 3.35
 -8 1 3 312.8 3.11
 -8 1 3 306.38 2.56
 -1 -8 -3 327.83 2.64
 -1 -8 3 302.64 2.68
 -1 -8 3 351.4 3.21
 1 8 -3 417.66 2.38
 1 8 -3 325.07 2.4
 1 8 3 261.71 2.85
 1 8 3 383.74 2.62
 8 -1 -3 275.36 2.98
 8 -1 -3 297.94 2.59
 -8 1 -5 265.3 3.66
 -8 1 5 207.33 2.49
 -8 1 5 257.72 2.47
 -8 1 5 304.17 2.64
 -1 -8 -5 237.32 2.28
 -1 -8 5 235.6 2.42
 -1 -8 5 275.29 2.8
 1 8 -5 200.34 2.33
 1 8 5 229.32 2.12
 8 -1 -5 208.78 2.48
 8 -1 -5 189.72 1.82
 -8 1 -7 444.15 4.83
 -8 1 7 468.68 3.81
 -8 1 7 403.68 3.14
 -1 -8 -7 336.76 2.57
 -1 -8 7 399.83 3.23
 1 8 -7 361.13 3.08
 1 8 7 284.36 2.27
 8 -1 -7 376.91 3.2
 -8 1 -9 179.55 2.99
 -8 1 9 155.38 2.22
 -8 1 9 161.43 2.02
 -1 -8 9 151.53 2.05
 1 8 -9 136.87 1.98
 1 8 9 107.78 1.41
 8 -1 -9 158.07 1.98
 8 -1 -9 131.92 1.18
 -8 1 -11 415.13 4.4
 -8 1 11 380.03 3.34
 -8 1 11 350.21 2.92
 -1 -8 11 263.2 2.69
 1 8 11 260.98 2.22
 8 -1 -11 422.21 2.99
 -8 0 0 1261.19 5.27
 -8 0 0 1090.27 4.42
 0 -8 0 1066.95 4.82
 0 -8 0 1231.21 5.7
 0 8 0 749.42 4.36
 0 8 0 1194.39 4.08
 8 0 0 749.76 4.7
 8 0 0 1049.05 4.19
 -8 0 -2 8.13 0.35
 -8 0 -2 6.96 0.8
 -8 0 2 2.39 0.48
 -8 0 2 4.34 0.48
 0 -8 -2 3.49 0.42
 0 -8 -2 3.78 0.5
 0 -8 2 4.27 0.48
 0 -8 2 6.15 0.65
 0 8 -2 5.04 0.45
 0 8 -2 2.44 0.36
 0 8 2 3.71 0.49
 0 8 2 3.85 0.41
 8 0 -2 4.01 0.53
 8 0 -2 7.23 0.55
 8 0 2 3.07 0.5
 8 0 2 9.9 0.4
 -8 0 -4 598.42 5.2
 -8 0 4 663.27 4.59
 -8 0 4 595.1 3.72
 -8 0 4 883.62 4.64
 0 -8 -4 708.75 4.04
 0 -8 4 649.91 3.96
 0 -8 4 727.73 4.36
 0 8 -4 596.66 4.17
 0 8 4 722.79 3.78
 8 0 -4 532.68 3.88
 8 0 -4 534.74 3.36
 -8 0 -6 53.56 1.73
 -8 0 6 44.94 1.21
 -8 0 6 53.1 1.21
 0 -8 -6 42.88 1.02
 0 -8 6 62.58 1.33
 0 8 -6 48.35 1.24
 0 8 6 40.7 0.93
 8 0 -6 44.22 1.14
 -8 0 -8 769.46 6.06
 -8 0 8 768.33 4.85
 -8 0 8 690.29 4.17
 0 -8 -8 580.95 3.38
 0 -8 8 677.11 4
 0 8 -8 617.89 4.22
 0 8 8 459.42 2.86
 8 0 -8 667.89 4.02
 8 0 -8 566.69 2.78
 -8 0 -10 45.67 1.58
 -8 0 10 53.18 1.34
 -8 0 10 44.48 1.13
 0 -8 10 45.05 1.14
 0 8 -10 36.91 1.15
 0 8 10 33.3 0.85
 8 0 -10 48.37 1.1
 -8 -1 -1 26.85 0.77
 -8 -1 -1 23.14 0.88
 -8 -1 1 22.18 0.83
 -1 8 -1 15.9 0.68
 -1 8 1 19.61 0.82
 -1 8 1 29.63 0.76
 1 -8 -1 22.7 0.8
 1 -8 -1 22.98 0.92
 1 -8 1 19.76 0.73
 1 -8 1 20.95 0.87
 8 1 -1 21.64 0.94
 8 1 -1 25.7 0.8
 8 1 1 21.56 1.08
 8 1 1 21.05 0.6
 -8 -1 -3 0.8 0.54
 -8 -1 3 0.71 0.4
 -8 -1 3 1.32 0.32
 -8 -1 3 0.69 0.5
 -1 8 3 0.95 0.39
 -1 8 3 0.48 0.27
 1 -8 -3 1.56 0.38
 1 -8 -3 1.47 0.43
 1 -8 3 1.15 0.31
 1 -8 3 0.86 0.4
 8 1 -3 0.8 0.37
 8 1 -3 0.99 0.34
 8 1 3 0.61 0.2
 -8 -1 -5 106.43 2.42
 -8 -1 5 83.5 1.71
 -8 -1 5 81.7 1.4
 -8 -1 5 85.28 1.51
 -1 8 -5 86.59 1.66
 -1 8 5 90.01 1.4
 1 -8 -5 84 1.43
 1 -8 5 108.49 1.62
 8 1 -5 79.06 1.48
 -8 -1 -7 5.47 0.88
 -8 -1 7 4.53 0.56
 -8 -1 7 4.36 0.54
 -1 8 -7 4.42 0.54
 -1 8 7 3.65 0.41
 1 -8 -7 3.61 0.43
 1 -8 7 4.54 0.52
 8 1 -7 4.08 0.46
 8 1 -7 3.3 0.34
 -8 -1 -9 58.11 1.73
 -8 -1 9 63.4 1.43
 -8 -1 9 65.54 1.34
 -1 8 -9 53.37 1.39
 -1 8 9 56.41 1.07
 1 -8 -9 56.64 1.13
 1 -8 9 72.49 1.31
 8 1 -9 64.69 1.27
 8 1 -9 52.53 0.69
 -8 -1 -11 30.74 1.33
 -8 -1 11 33.39 1.08
 -8 -1 11 27.54 0.88
 -1 8 -11 26.76 1.04
 -1 8 11 29.41 0.84
 1 -8 11 28.79 0.92
 -8 -2 0 3.96 0.49
 -2 8 0 2.61 0.38
 2 -8 0 4.49 0.5
 2 -8 0 3.68 0.51
 8 2 0 3.55 0.65
 8 2 0 4.48 0.45
 -8 -2 -2 181.81 1.47
 -8 -2 2 160.52 2.04
 -2 8 -2 201.89 1.29
 -2 8 -2 227.63 1.96
 -2 8 2 155.15 2.11
 -2 8 2 238.13 2.06
 2 -8 -2 192.81 2.16
 2 -8 -2 186.95 2.27
 2 -8 2 158.51 1.8
 2 -8 2 178.2 2.16
 8 2 -2 190.84 2.57
 8 2 -2 202.82 2.07
 8 2 2 153.12 2.24
 8 2 2 192.47 1.51
 -8 -2 -4 3.77 0.69
 -8 -2 4 3.33 0.48
 -8 -2 4 3.35 0.42
 -8 -2 4 2.22 0.42
 -2 8 -4 3.25 0.54
 -2 8 4 3.18 0.51
 -2 8 4 5.17 0.54
 2 -8 -4 4.02 0.46
 2 -8 4 3.07 0.4
 2 -8 4 6.59 0.62
 8 2 -4 2.23 0.44
 8 2 -4 2.18 0.36
 8 2 4 3.26 0.25
 -8 -2 -6 23.99 1.42
 -8 -2 6 14.81 0.76
 -8 -2 6 13.75 0.68
 -2 8 -6 15.96 0.83
 -2 8 6 14.81 0.63
 2 -8 -6 14.37 0.67
 2 -8 6 23.69 0.8
 8 2 -6 17.53 0.78
 8 2 -6 14.59 0.6
 -8 -2 -8 1.67 0.68
 -8 -2 8 2.43 0.46
 -8 -2 8 1.45 0.35
 -2 8 -8 4.67 0.61
 -2 8 8 1.9 0.33
 2 -8 -8 2.6 0.39
 2 -8 8 4.23 0.49
 8 2 -8 1.77 0.22
 -8 -2 10 77.87 1.57
 -8 -2 10 73.44 1.27
 -2 8 -10 68.03 1.63
 -2 8 10 80.47 1.3
 2 -8 -10 86.4 1.39
 2 -8 10 89.19 1.35
 -8 -3 -1 378.01 2.51
 -8 -3 1 508.53 3.81
 -3 8 -1 550.83 3.47
 -3 8 1 196.74 1.99
 3 -8 -1 461.48 3.37
 3 -8 -1 386.05 3.22
 3 -8 1 447.69 3.09
 3 -8 1 380.6 3.12
 8 3 -1 399.19 4.12
 8 3 -1 385.3 2.76
 8 3 1 359.86 3.64
 8 3 1 372.67 2.32
 -8 -3 -3 278.99 1.7
 -8 -3 3 204.73 2.36
 -8 -3 3 149.53 1.69
 -3 8 -3 285.39 3.26
 -3 8 3 193.64 2.28
 -3 8 3 317.07 2.54
 3 -8 -3 253.84 2.57
 3 -8 -3 280.29 2.73
 3 -8 3 209.49 1.99
 3 -8 3 270.2 2.56
 8 3 -3 271.21 3.2
 8 3 -3 287.95 2.39
 8 3 3 338.66 2
 -8 -3 5 289.81 2.96
 -8 -3 5 314.27 2.7
 -8 -3 5 243.28 2.18
 -3 8 -5 381.44 3.67
 -3 8 5 306.94 2.5
 3 -8 -5 321.91 2.88
 3 -8 5 379.06 2.87
 8 3 -5 411.98 3.49
 8 3 -5 274.74 2.38
 8 3 5 338.77 1.57
 -8 -3 7 48.13 1.23
 -8 -3 7 46.66 1
 -3 8 -7 52.01 1.45
 -3 8 7 50.6 1.03
 3 -8 -7 49.85 1.16
 3 -8 7 65.27 1.07
 8 3 -7 44.57 0.82
 -8 -3 9 145.92 2.09
 -8 -3 9 158.25 1.76
 -3 8 -9 144.87 2.38
 -3 8 9 171.27 1.86
 3 -8 -9 149.16 1.9
 3 -8 9 188.07 1.7
 8 3 -9 179.04 1.16
 -8 -3 11 6.31 0.58
 -8 -3 11 7.68 0.52
 -3 8 -11 4.93 0.68
 -3 8 11 7.1 0.52
 3 -8 11 7.58 0.49
 -8 -4 0 1729.58 6.16
 -4 8 0 1543.74 7.16
 4 -8 0 1718.43 6.59
 4 -8 0 1316.71 5.86
 8 4 0 1371.6 4.8
 -8 -4 -2 1.21 0.25
 -8 -4 2 2.34 0.44
 -4 8 -2 2.36 0.59
 -4 8 2 0.71 0.29
 4 -8 -2 3.19 0.49
 4 -8 -2 2 0.45
 4 -8 2 2.02 0.36
 4 -8 2 1.41 0.38
 8 4 -2 3.13 0.43
 8 4 2 3.35 0.37
 -8 -4 4 678.39 4.33
 -8 -4 4 699.84 3.52
 -4 8 -4 1032.29 6.3
 -4 8 4 508.33 3.52
 -4 8 4 953.62 4.62
 4 -8 -4 817.11 4.71
 4 -8 4 834.07 4.22
 8 4 -4 735.13 3.99
 8 4 4 1112.34 3.61
 -8 -4 6 4.43 0.54
 -8 -4 6 2.01 0.34
 -4 8 -6 2.03 0.51
 -4 8 6 1.8 0.34
 4 -8 -6 1.73 0.4
 4 -8 6 3.23 0.38
 8 4 -6 2.59 0.31
 8 4 6 2.89 0.29
 -8 -4 8 518.72 3.88
 -8 -4 8 568.61 3.2
 -4 8 -8 554.79 4.73
 -4 8 8 554.44 3.29
 4 -8 -8 534.94 3.7
 4 -8 8 504.59 2.46
 8 4 -8 542.79 2.39
 8 4 8 438.74 1.98
 -8 -4 10 1.14 0.37
 -8 -4 10 0.53 0.3
 -4 8 -10 0.56 0.44
 -4 8 10 0.58 0.31
 4 -8 -10 0.74 0.33
 4 -8 10 0.48 0.25
 -8 -5 -1 656.44 3.46
 -8 -5 1 797.26 4.66
 -5 8 -1 826.53 6.19
 -5 8 1 650.5 3.49
 5 -8 -1 749.96 4.6
 5 -8 -1 561.03 3.98
 5 -8 1 780.85 4.32
 5 -8 1 536.25 3.81
 8 5 -1 677.78 3.59
 8 5 1 562.18 3.04
 -8 -5 -3 689.84 3.28
 -8 -5 3 635.73 4.29
 -5 8 -3 776.99 5.85
 -5 8 3 577.68 3.51
 5 -8 -3 594.02 4.12
 5 -8 -3 771.33 4.71
 5 -8 3 547.47 3.57
 8 5 -3 522 3.41
 8 5 -3 792.76 4.08
 8 5 3 897.31 3.75
 -8 -5 5 224.69 2.54
 -8 -5 5 261.2 2.1
 -5 8 -5 295.23 3.6
 -5 8 5 221.98 2.33
 5 -8 -5 241.38 2.61
 5 -8 5 221.19 1.96
 8 5 -5 245.33 2.09
 8 5 5 351.36 2.13
 -8 -5 7 407.96 3.52
 -8 -5 7 532.58 3.08
 -5 8 -7 466.15 4.54
 -5 8 7 465.39 3.02
 5 -8 -7 416.16 3.39
 5 -8 7 374.68 2.12
 8 5 -7 448.03 2.44
 8 5 7 422.14 2.24
 -8 -5 9 187.5 2.35
 -8 -5 9 211.82 1.98
 -5 8 -9 201.91 3.06
 -5 8 9 229.36 2.19
 5 -8 -9 213.63 2.41
 8 5 -9 237.6 1.11
 8 5 9 195.49 1.57
 -8 -5 11 316.31 2.45
 -5 8 -11 315.28 3.82
 -5 8 11 253.16 2.8
 -5 8 11 331.91 2.62
 5 -8 -11 314.75 2.67
 8 5 11 265.85 1.9
 -8 -6 0 17.91 0.71
 -6 8 0 24.37 0.73
 6 -8 0 24.31 0.93
 6 -8 0 18.9 0.91
 8 6 0 19.06 0.68
 -8 -6 -2 13.72 0.59
 -8 -6 2 19.09 0.87
 -6 8 -2 15.01 0.73
 -6 8 -2 17.67 1.19
 -6 8 2 13.56 0.61
 6 -8 -2 14.25 0.76
 6 -8 -2 16.98 0.89
 6 -8 2 17.88 0.75
 6 -8 2 13.38 0.74
 8 6 -2 12.24 0.61
 8 6 -2 18.36 0.72
 8 6 2 16.74 0.62
 -8 -6 -4 20.66 0.64
 -8 -6 4 13.52 0.71
 -6 8 -4 18.86 1.12
 -6 8 4 15.49 0.66
 6 -8 -4 14.86 0.78
 6 -8 -4 20.07 0.86
 6 -8 4 11.41 0.59
 8 6 -4 14.24 0.6
 8 6 4 23.69 0.72
 -8 -6 6 61.99 1.4
 -8 -6 6 89.62 1.3
 -6 8 -6 88.28 2.15
 6 -8 -6 71.94 1.5
 6 -8 6 50.12 0.87
 8 6 -6 77.17 1.13
 8 6 6 92.46 1.2
 -8 -6 8 19.04 0.86
 -8 -6 8 23.29 0.72
 -6 8 -8 19.62 1.13
 6 -8 -8 21.48 0.89
 8 6 -8 21.41 0.52
 8 6 8 22.34 0.64
 -8 -6 10 116.24 1.51
 -6 8 -10 96.97 2.27
 -6 8 10 97.77 1.78
 6 -8 -10 101.12 1.71
 8 6 10 89.88 1.2
 -8 -7 -1 260.2 2.34
 -8 -7 1 249.93 2.56
 -7 8 -1 315.54 3.11
 -7 8 -1 342.03 4.21
 -7 8 1 239.4 2.56
 -7 8 1 388.41 3.15
 7 -8 -1 271.4 2.93
 7 -8 -1 252.99 2.75
 7 -8 1 325.8 3.03
 7 -8 1 235.05 2.78
 8 7 -1 276.15 2.34
 8 7 1 264.03 2.21
 -8 -7 -3 90.69 1.34
 -8 -7 3 91.92 1.7
 -7 8 -3 96.89 2.26
 -7 8 3 79.64 1.24
 7 -8 -3 84.79 1.69
 7 -8 -3 88.99 1.59
 7 -8 3 62.52 1.27
 8 7 -3 82.88 1.39
 8 7 3 125.42 1.56
 -8 -7 5 191.02 2.42
 -7 8 -5 210.02 3.3
 -7 8 5 226.88 2.18
 7 -8 -5 190.77 2.47
 7 -8 5 153.57 1.64
 8 7 -5 209.45 1.96
 8 7 5 266.26 2.17
 -8 -7 7 74.03 1.54
 -8 -7 7 115.33 1.51
 -7 8 -7 93.04 2.31
 -7 8 7 86.11 1.67
 7 -8 -7 84.98 1.68
 7 -8 7 78.2 0.99
 8 7 -7 89.76 1.12
 8 7 7 101.71 1.34
 -8 -7 9 129.78 2.06
 -8 -7 9 172.25 1.85
 -7 8 -9 143.06 2.89
 -7 8 9 122.42 1.98
 7 -8 -9 142.96 2.11
 8 7 9 140.08 1.56
 -8 -8 0 603.27 3.8
 -8 8 0 657.64 4.36
 -8 8 0 743.94 5.62
 8 -8 0 655.41 4.65
 8 -8 0 505.77 3.88
 8 8 0 557.07 3.3
 -8 -8 -2 5.37 0.47
 -8 -8 2 6.22 0.61
 -8 8 -2 7.56 0.88
 -8 8 2 6.64 0.6
 -8 8 2 7.99 0.62
 8 -8 -2 5.44 0.6
 8 -8 -2 5.7 0.57
 8 -8 2 3.87 0.49
 8 8 2 7.26 0.52
 -8 -8 -4 584.54 3.46
 -8 -8 4 487.49 3.75
 -8 8 -4 512.2 5.23
 -8 8 4 467.13 3.76
 -8 8 4 502.63 3.05
 8 -8 -4 451.42 3.89
 8 -8 -4 607.55 3.9
 8 -8 4 356.75 2.74
 8 8 -4 578.32 3.5
 8 8 4 635.6 3.6
 -8 -8 6 2.45 0.43
 -8 8 -6 4.52 0.79
 -8 8 6 2.89 0.47
 -8 8 6 4.43 0.47
 8 -8 -6 3.85 0.53
 8 -8 6 3.84 0.45
 8 8 -6 2.9 0.32
 8 8 6 5.2 0.49
 -8 -8 8 482.38 3.9
 -8 -8 8 716.46 3.78
 -8 8 -8 493.54 5.42
 -8 8 8 478.16 3.84
 8 -8 -8 538.31 4.18
 8 8 -8 606.18 2.24
 8 8 8 534.42 3.17
 -9 8 -1 40.97 1.12
 -9 8 -1 49.45 1.54
 -9 8 1 56.98 1.35
 -9 8 1 65.23 1.57
 -8 -9 -1 49.15 1.13
 -8 -9 1 52.4 1.24
 8 9 -1 55.78 1.13
 8 9 1 61.93 1.18
 9 -8 -1 53.94 1.47
 9 -8 -1 45.07 1.23
 9 -8 1 31.4 0.97
 -9 8 -3 41.31 1.67
 -9 8 3 43.07 1.19
 -9 8 3 44.72 1
 -8 -9 -3 38.12 0.97
 -8 -9 3 41.03 1.16
 8 9 -3 48.03 1.09
 8 9 3 58.79 1.17
 9 -8 -3 43.36 1.34
 9 -8 -3 43.56 1.16
 9 -8 3 25.05 0.83
 -9 8 -5 71.26 2.18
 -9 8 5 75.67 1.57
 -9 8 5 70.77 1.18
 -8 -9 -5 88.43 1.41
 -8 -9 5 58.12 1.33
 8 9 -5 74.26 1.21
 8 9 5 100.64 1.52
 9 -8 -5 65.77 1.6
 9 -8 5 68.13 1.2
 -9 8 -7 20.34 1.33
 -9 8 7 19.06 0.84
 -8 -9 7 15.75 0.77
 8 9 -7 18.15 0.53
 8 9 7 22.05 0.77
 9 -8 -7 18.06 0.93
 9 -8 7 24.57 0.73
 -9 7 0 0.68 0.34
 -9 7 0 0.38 0.43
 -7 -9 0 1.71 0.35
 7 9 0 0.43 0.29
 9 -7 0 1.17 0.48
 9 -7 0 0.85 0.37
 -9 7 -2 285.86 3.59
 -9 7 2 373.9 3.31
 -9 7 2 399.58 3.02
 -7 -9 -2 286.8 2.56
 -7 -9 2 357.89 3.18
 7 9 -2 342.06 2.86
 7 9 2 430.76 2.95
 9 -7 -2 311.48 3.36
 9 -7 -2 296.15 2.85
 9 -7 2 234.77 2.37
 -9 7 -4 57.15 1.93
 -9 7 4 54.3 1.31
 -9 7 4 59.89 1.12
 -7 -9 -4 64.36 1.26
 -7 -9 4 50.49 1.24
 7 9 -4 59.93 1.19
 7 9 4 86.87 1.41
 9 -7 -4 59.42 1.55
 9 -7 -4 60.85 1.29
 9 -7 4 53.48 1.06
 -9 7 -6 319.51 4.5
 -9 7 6 315.8 3.06
 -9 7 6 341.08 2.58
 -7 -9 6 270.05 2.81
 -7 -9 6 421.7 3.06
 7 9 -6 329.61 2.32
 7 9 6 369.94 2.8
 9 -7 -6 274.87 3.14
 9 -7 6 350.99 2.01
 -9 7 -8 90.01 2.54
 -9 7 8 69.53 1.47
 -7 -9 8 65.38 1.47
 -7 -9 8 105.89 1.58
 7 9 8 78.67 1.31
 9 -7 -8 73.09 1.65
 -9 6 -1 235.39 2.56
 -9 6 -1 200.34 2.74
 -9 6 1 234.61 2.66
 -9 6 1 264.14 2.7
 -9 6 1 227.46 1.52
 -6 -9 -1 184.88 2.11
 -6 -9 1 218.47 2.4
 6 9 -1 227.64 2.44
 6 9 -1 229.79 2.09
 6 9 1 250.76 2.19
 9 -6 -1 220.42 2.8
 9 -6 -1 162.61 2.15
 9 -6 1 185.9 2.32
 -9 6 -3 218.5 3.4
 -9 6 3 250.75 2.73
 -9 6 3 265.54 2.48
 -6 -9 -3 238.58 2.4
 -6 -9 3 204.82 2.43
 -6 -9 3 282.31 2.51
 6 9 -3 220.17 2.31
 6 9 3 330.7 2.64
 9 -6 -3 244.86 3.07
 9 -6 -3 222.33 2.41
 9 -6 3 242.47 2.13
 -9 6 -5 164.35 3.3
 -9 6 5 186.41 2.35
 -9 6 5 184.93 1.93
 -6 -9 -5 195.11 2.08
 -6 -9 5 146.44 2.04
 -6 -9 5 243.04 2.47
 6 9 -5 188.53 2.05
 6 9 5 210.72 2.09
 9 -6 -5 183.19 2.66
 9 -6 5 221.3 1.54
 -9 6 -7 196.98 3.69
 -9 6 7 208.01 2.45
 -6 -9 7 169.42 2.24
 -6 -9 7 254.89 2.5
 6 9 -7 205.32 1.24
 6 9 7 218.36 2.13
 9 -6 -7 210.43 2.78
 -9 6 -9 32.03 1.7
 -9 6 9 24.87 0.93
 -6 -9 9 29.89 0.94
 6 9 9 25.66 0.81
 9 -6 -9 23.88 0.95
 -9 5 0 0.24 0.41
 -9 5 0 0.38 0.36
 -5 -9 0 1.14 0.35
 5 9 0 2.14 0.43
 5 9 0 0.71 0.27
 9 -5 0 0.52 0.4
 9 -5 0 0.51 0.44
 -9 5 -2 417.55 4.06
 -9 5 2 497.69 3.86
 -9 5 2 468.4 3.06
 -5 -9 -2 487.2 3.47
 -5 -9 2 470.15 3.48
 -5 -9 2 605.76 3.85
 5 9 -2 427.63 3.49
 5 9 2 632.56 3.49
 9 -5 -2 479.5 4.12
 9 -5 -2 359.86 3.12
 9 -5 2 548.69 3.32
 -9 5 -4 9.63 0.98
 -9 5 4 12.45 0.74
 -9 5 4 11.87 0.66
 -5 -9 -4 10.41 0.63
 -5 -9 4 9.57 0.64
 -5 -9 4 11.2 0.8
 5 9 -4 9.93 0.59
 5 9 4 11.44 0.61
 9 -5 -4 9.34 0.81
 9 -5 -4 8.38 0.6
 9 -5 4 11.3 0.48
 -9 5 -6 463.07 5.57
 -9 5 6 479.35 3.12
 -5 -9 -6 493.22 3.17
 -5 -9 6 445.01 3.53
 -5 -9 6 630.95 4.27
 5 9 -6 465.17 2.34
 5 9 6 448.96 3.01
 9 -5 -6 518.64 4.51
 -9 5 -8 6.69 1.05
 -9 5 8 5.06 0.56
 -5 -9 8 2.7 0.45
 -5 -9 8 4.37 0.55
 5 9 8 4.36 0.45
 9 -5 -8 6.42 0.61
 -9 5 -10 412.21 5.04
 -9 5 10 317.87 2.99
 -5 -9 10 399.65 3.15
 5 9 10 238.75 2.2
 9 -5 -10 330.15 2.97
 -9 4 -1 99.87 1.58
 -9 4 -1 69.54 1.53
 -9 4 1 70.94 1.54
 -4 -9 -1 78.06 1.45
 -4 -9 1 78.64 1.44
 -4 -9 1 79.05 1.44
 4 9 -1 74.06 1.58
 4 9 1 115.36 2.25
 4 9 1 98.33 1.37
 9 -4 -1 76.66 1.66
 9 -4 -1 111.37 2
 9 -4 1 77.6 1.6
 9 -4 1 102.12 1.61
 -9 4 -3 32.39 1.33
 -9 4 3 34.68 1.1
 -9 4 3 29.16 0.91
 -4 -9 -3 36.16 0.97
 -4 -9 3 32.9 0.98
 -4 -9 3 36.41 1.18
 4 9 -3 32.07 0.97
 4 9 3 48.95 1.07
 9 -4 -3 34.47 1.25
 9 -4 -3 29.01 0.95
 9 -4 3 42.3 0.8
 -9 4 -5 8.65 1.05
 -9 4 5 10.25 0.68
 -9 4 5 10.74 0.64
 -4 -9 -5 10.87 0.64
 -4 -9 5 8.42 0.62
 -4 -9 5 9 0.78
 4 9 -5 9.22 0.64
 4 9 -5 9.29 0.49
 4 9 5 10.77 0.59
 9 -4 -5 11.05 0.86
 -9 4 -7 58.01 2.14
 -9 4 7 46.61 1.23
 -4 -9 -7 36.64 0.89
 -4 -9 7 38.41 1.1
 -4 -9 7 44.52 1.24
 4 9 7 43.02 1
 9 -4 -7 48.37 1.37
 -9 4 -9 14.88 1.25
 -9 4 9 12.57 0.69
 -4 -9 9 16.24 0.84
 4 9 9 8.74 0.55
 9 -4 -9 10.77 0.68
 -9 3 0 1.23 0.47
 -9 3 0 0.76 0.35
 -3 -9 0 1.02 0.38
 -3 -9 0 1.06 0.41
 3 9 0 0.67 0.44
 3 9 0 1.28 0.29
 9 -3 0 1 0.46
 9 -3 0 0.72 0.4
 -9 3 -2 862.92 5.49
 -9 3 2 873.35 5.16
 -9 3 2 1032.99 4.33
 -3 -9 -2 1107.79 5.13
 -3 -9 2 1062.37 5.13
 -3 -9 2 829.56 4.97
 3 9 -2 775 4.72
 3 9 2 1422.36 5.25
 9 -3 -2 930.59 5.85
 9 -3 -2 1284.48 6.14
 9 -3 2 1199.3 4.27
 -9 3 -4 0.93 0.62
 -9 3 4 1.07 0.36
 -9 3 4 1.42 0.34
 -3 -9 -4 2.05 0.39
 -3 -9 4 1.59 0.37
 -3 -9 4 2.52 0.62
 3 9 -4 0.96 0.29
 3 9 4 1.75 0.35
 9 -3 -4 1.23 0.46
 9 -3 -4 2.31 0.38
 -9 3 -6 1026.46 8.1
 -9 3 6 805.82 5.09
 -9 3 6 956.5 4.65
 -3 -9 -6 760.29 4.04
 -3 -9 6 692.5 4.33
 -3 -9 6 650.31 4.61
 3 9 -6 790.23 4.44
 3 9 6 682.21 3.73
 9 -3 -6 770.5 5.09
 -9 3 -8 3.74 0.8
 -9 3 8 3.28 0.49
 -3 -9 8 3.21 0.54
 3 9 8 2.84 0.41
 9 -3 -8 2.88 0.47
 -9 3 -10 449.51 5.04
 -9 3 10 340.87 3.11
 -3 -9 10 388.25 3.35
 3 9 10 211 2.02
 9 -3 -10 331.91 2.9
 9 -3 -10 313.56 1.76
 -9 2 -1 853.52 4.04
 -9 2 -1 649.61 4.39
 -9 2 1 790.85 5.29
 -2 -9 -1 721.56 4.22
 -2 -9 -1 547.75 3.71
 -2 -9 1 673.17 4.26
 -2 -9 1 608.25 4.11
 2 9 -1 486.4 3.81
 2 9 1 566.94 4.36
 2 9 1 897.52 3.95
 9 -2 -1 584.55 4.67
 9 -2 -1 792.21 4.28
 9 -2 1 558.37 4.34
 9 -2 1 817.12 3.9
 -9 2 -3 517.65 4.71
 -9 2 3 427.24 3.63
 -9 2 3 460.76 3.15
 -2 -9 -3 491.07 3.38
 -2 -9 3 492.66 3.51
 -2 -9 3 447.13 3.77
 2 9 -3 446.51 3.19
 2 9 3 597.05 3.44
 9 -2 -3 507.93 4.43
 9 -2 -3 470.13 3.51
 9 -2 3 596.22 2.41
 -9 2 -5 733.48 6.11
 -9 2 5 671.75 4.54
 -9 2 5 786.46 4.24
 -2 -9 -5 748.03 4.22
 -2 -9 5 688.71 4.26
 -2 -9 5 872.36 5.39
 2 9 -5 811.61 4.73
 2 9 5 858.27 4.2
 9 -2 -5 685.78 4.75
 -9 2 -7 316.47 4.3
 -9 2 7 341.18 3.36
 -2 -9 -7 254.08 2.31
 -2 -9 7 291.94 3.06
 2 9 -7 243.48 2.54
 2 9 7 252.26 2.29
 9 -2 -7 285.46 2.93
 -9 2 -9 523.5 5.33
 -9 2 9 559.71 4.1
 -2 -9 9 397.12 3.49
 2 9 -9 438.2 3.42
 2 9 9 282.43 2.33
 9 -2 -9 434.57 3.4
 9 -2 -9 350.6 2.16
 -9 2 -11 189.37 3.14
 -9 2 11 189 2.35
 -2 -9 11 166.86 2.22
 2 9 11 124.77 1.58
 9 -2 -11 191.18 2.09
 -9 1 0 0.69 0.32
 -9 1 0 1.39 0.4
 -1 -9 0 1.43 0.37
 -1 -9 0 1.18 0.4
 1 9 0 0.58 0.36
 1 9 0 1.5 0.29
 9 -1 0 0.73 0.42
 9 -1 0 0.68 0.36
 -9 1 -2 13.65 0.45
 -9 1 -2 12.25 0.9
 -9 1 2 12.99 0.89
 -9 1 2 11.87 0.62
 -1 -9 -2 11.29 0.61
 -1 -9 2 9.93 0.67
 -1 -9 2 11.39 0.8
 1 9 -2 9.5 0.62
 1 9 2 8.79 0.7
 1 9 2 15.02 0.63
 9 -1 -2 9.16 0.71
 9 -1 -2 12.57 0.68
 9 -1 2 12.77 0.55
 -9 1 -4 25.02 1.21
 -9 1 4 22.62 0.95
 -9 1 4 20.47 0.77
 -1 -9 -4 26.68 0.89
 -1 -9 4 23.5 0.86
 -1 -9 4 27.63 1.07
 1 9 -4 26.82 1.02
 1 9 -4 25.25 0.47
 1 9 -4 26.42 0.58
 1 9 4 29.26 0.84
 9 -1 -4 20.39 0.92
 9 -1 -4 23.59 0.8
 -9 1 -6 3.35 0.76
 -9 1 6 3.75 0.52
 -9 1 6 4.78 0.5
 -1 -9 -6 3.73 0.45
 -1 -9 6 3.21 0.56
 1 9 -6 3.53 0.51
 1 9 6 5.44 0.48
 9 -1 -6 3.18 0.48
 -9 1 -8 17.33 1.14
 -9 1 8 17.25 0.87
 -1 -9 -8 10.92 0.57
 -1 -9 8 14.81 0.82
 1 9 -8 13.44 0.74
 1 9 8 10.06 0.54
 9 -1 -8 13.36 0.71
 -9 1 -10 0.46 0.52
 -9 1 10 1.48 0.43
 -9 1 10 1.01 0.42
 -1 -9 10 1.57 0.48
 1 9 -10 0.61 0.38
 1 9 10 1.22 0.33
 9 -1 -10 0.97 0.35
 9 -1 -10 1.84 0.21
 -9 0 -1 42.45 0.95
 -9 0 -1 44.48 1.18
 -9 0 1 35.67 1.03
 0 -9 -1 36.81 1.01
 0 -9 -1 40.38 1.17
 0 -9 1 38.1 1.01
 0 -9 1 44.17 1.27
 0 9 -1 29.04 0.93
 0 9 1 33.21 1.06
 0 9 1 50.35 0.98
 9 0 -1 30.32 1.07
 9 0 -1 48.81 1.1
 9 0 1 30.05 1.08
 9 0 1 49.24 1
 -9 0 -3 26.29 1.27
 -9 0 3 23.65 1.07
 -9 0 3 21 0.76
 0 -9 -3 25.76 0.86
 0 -9 3 23.26 0.88
 0 -9 3 29.33 1.08
 0 9 -3 29.61 0.64
 0 9 -3 22.09 0.66
 0 9 3 24.35 1.01
 0 9 3 31.34 0.86
 9 0 -3 19.72 0.87
 9 0 -3 29.91 0.9
 9 0 3 27.88 0.58
 -9 0 -5 98.58 2.26
 -9 0 5 79.99 1.66
 -9 0 5 65.1 1.25
 0 -9 -5 81.71 1.46
 0 -9 5 82.7 1.49
 0 -9 5 109.79 1.84
 0 9 -5 75.84 1.58
 0 9 5 101.38 1.54
 9 0 -5 73.13 1.5
 -9 0 -7 3.59 0.74
 -9 0 7 3.09 0.48
 -9 0 7 3.22 0.48
 0 -9 -7 3.31 0.42
 0 -9 7 2.73 0.5
 0 9 -7 2.81 0.47
 0 9 7 2.11 0.35
 9 0 -7 1.98 0.4
 -9 0 -9 38.91 1.55
 -9 0 9 44.29 1.24
 -9 0 9 43.34 1.16
 0 -9 -9 31.93 0.86
 0 -9 9 38.36 1.11
 0 9 -9 32.19 1.09
 0 9 9 30.44 0.83
 9 0 -9 39.35 1.05
 9 0 -9 30.33 0.61
 -9 0 -11 3.58 0.7
 -9 0 11 4.41 0.55
 -9 0 11 4.94 0.57
 0 -9 11 3.91 0.56
 0 9 -11 3.51 0.52
 0 9 11 3.18 0.4
 -9 -1 0 1.5 0.39
 -1 9 0 0.33 0.32
 1 -9 0 0.79 0.35
 1 -9 0 0.66 0.4
 9 1 0 1.05 0.43
 9 1 0 0.6 0.31
 -9 -1 -2 92.66 1.04
 -9 -1 -2 100.64 1.85
 -9 -1 2 80.71 1.51
 -1 9 -2 117.12 1.28
 -1 9 -2 65.67 1.05
 -1 9 2 90.9 1.7
 -1 9 2 136.56 1.66
 1 -9 -2 101.31 1.64
 1 -9 -2 108.09 1.83
 1 -9 2 85.56 1.44
 1 -9 2 98.19 1.74
 9 1 -2 83.46 1.67
 9 1 -2 112.23 1.59
 9 1 2 90.71 1.13
 -9 -1 -4 4.67 0.77
 -9 -1 4 3.72 0.55
 -9 -1 4 5.32 0.55
 -1 9 -4 5.73 0.64
 -1 9 4 5.41 0.54
 1 -9 -4 4.44 0.54
 1 -9 4 3.58 0.47
 1 -9 4 4.39 0.55
 9 1 -4 3.28 0.46
 9 1 -4 5.72 0.48
 9 1 4 5.63 0.32
 -9 -1 -6 172.16 3.04
 -9 -1 6 150.68 2.25
 -1 9 -6 159.55 2.27
 -1 9 6 138.54 1.71
 1 -9 -6 137 1.87
 1 -9 6 173.46 2.16
 9 1 -6 158.62 2.07
 -9 -1 -8 33.11 1.5
 -9 -1 8 33.08 1.11
 -9 -1 8 36.22 1.04
 -1 9 -8 29.75 1.08
 -1 9 8 29.06 0.82
 1 -9 -8 29.28 0.89
 1 -9 8 41.25 1.12
 9 1 -8 35.73 0.99
 9 1 -8 28.88 0.68
 -9 -1 -10 158.29 2.82
 -9 -1 10 158.95 2.27
 -9 -1 10 158.81 1.95
 -1 9 -10 140.37 2.21
 -1 9 10 146.87 1.73
 1 -9 -10 159.71 1.83
 1 -9 10 168.48 2.11
 9 1 -10 155.6 0.99
 -9 -2 -1 242.57 2.07
 -9 -2 1 211.62 2.37
 -2 9 -1 105.51 1.36
 -2 9 1 159.93 2.08
 2 -9 -1 225.84 2.42
 2 -9 -1 230.82 2.63
 2 -9 1 218.33 2.26
 2 -9 1 222.78 2.59
 9 2 -1 250.33 3.13
 9 2 -1 255.59 2.36
 9 2 1 186.36 2.7
 9 2 1 202.24 1.82
 -9 -2 3 102.41 1.74
 -2 9 -3 129.38 2.22
 -2 9 3 110.11 1.91
 -2 9 3 146.51 1.79
 2 -9 -3 140.2 1.99
 2 -9 -3 152.3 2.12
 2 -9 3 95.65 1.48
 2 -9 3 136.03 2.04
 9 2 -3 106.91 1.85
 9 2 -3 125.94 1.65
 9 2 3 150.19 1.37
 -9 -2 5 226.98 2.7
 -9 -2 5 231.97 2.38
 -2 9 -5 225.64 2.8
 -2 9 5 259.08 2.43
 2 -9 -5 213.06 2.38
 2 -9 5 289.79 2.77
 9 2 -5 255.62 2.69
 9 2 5 311.7 1.43
 -9 -2 7 170.82 2.31
 -9 -2 7 158.17 1.89
 -2 9 -7 164.23 2.39
 -2 9 7 147.97 1.73
 2 -9 -7 149.33 1.94
 2 -9 7 207.77 2.25
 9 2 -7 193.45 2.27
 9 2 -7 154.7 1.65
 -9 -2 9 214.5 2.58
 -9 -2 9 237.12 2.24
 -2 9 -9 219.54 2.8
 -2 9 9 229.27 2.15
 2 -9 -9 228 2.31
 2 -9 9 288.73 2.58
 9 2 -9 209.88 1.42
 -9 -2 11 99.02 1.77
 -9 -2 11 81.74 1.34
 -2 9 -11 73.19 1.67
 -2 9 11 91.08 1.42
 2 -9 11 90.04 1.47
 -3 9 0 1.27 0.29
 3 -9 0 1.59 0.38
 3 -9 0 1.42 0.46
 9 3 0 2.43 0.6
 9 3 0 2.22 0.37
 -9 -3 -2 773 3.25
 -9 -3 2 755.36 4.53
 -3 9 2 415.67 3.14
 3 -9 -2 855.8 4.92
 3 -9 -2 884.27 5.03
 3 -9 2 753.2 4.07
 3 -9 2 847.57 4.93
 9 3 -2 851.17 6.09
 9 3 -2 951.7 4.65
 9 3 2 695.89 3.19
 -9 -3 4 19.18 0.85
 -3 9 -4 21.7 1.06
 -3 9 4 19.46 0.87
 -3 9 4 28.42 0.94
 3 -9 -4 20.86 0.84
 3 -9 4 27.9 0.99
 9 3 -4 23.17 0.96
 9 3 -4 23.7 0.79
 9 3 4 32.17 0.69
 -9 -3 6 453.41 3.71
 -3 9 -6 462.25 4.09
 -3 9 6 475.85 3.12
 3 -9 -6 463.98 3.5
 3 -9 6 631.8 3.83
 9 3 -6 497.06 3.09
 9 3 6 557.27 2.09
 -9 -3 8 13.44 0.73
 -9 -3 8 15.73 0.65
 -3 9 -8 16.18 0.92
 -3 9 8 17.73 0.69
 3 -9 -8 15.35 0.72
 3 -9 8 21.06 0.75
 9 3 -8 15.4 0.48
 -9 -3 10 424.8 3.53
 -9 -3 10 490.22 3.08
 -3 9 -10 428.02 4.05
 -3 9 10 488.2 3.18
 3 -9 -10 506.96 3.46
 3 -9 10 453.56 2.92
 -9 -4 -1 0.57 0.26
 -9 -4 1 0.72 0.4
 -4 9 -1 0.56 0.21
 -4 9 -1 0.85 0.32
 -4 9 1 0.13 0.26
 4 -9 -1 0.92 0.38
 4 -9 -1 0.44 0.4
 4 -9 1 1.49 0.38
 4 -9 1 0.02 0.37
 9 4 -1 0.67 0.31
 9 4 1 0.45 0.27
 -9 -4 -3 1.3 0.26
 -9 -4 3 0.53 0.31
 -4 9 -3 0.93 0.5
 -4 9 3 0.96 0.3
 4 -9 -3 1.35 0.39
 4 -9 -3 3.34 0.53
 4 -9 3 0.7 0.3
 4 -9 3 1.29 0.43
 9 4 -3 0.81 0.27
 9 4 -3 3.29 0.45
 9 4 3 1.27 0.31
 -9 -4 5 31.53 1.02
 -4 9 -5 37.05 1.32
 4 -9 -5 31.33 1
 4 -9 5 38.15 1.04
 9 4 -5 33.54 0.86
 9 4 5 54.11 0.86
 -9 -4 7 15.86 0.76
 -9 -4 7 16.96 0.64
 -4 9 -7 17.62 0.95
 -4 9 7 17.09 0.68
 4 -9 -7 16.52 0.77
 4 -9 7 21.01 0.72
 9 4 -7 17.48 0.56
 9 4 7 21.74 0.53
 -9 -4 9 4.92 0.5
 -9 -4 9 6.03 0.48
 -4 9 -9 4.8 0.68
 -4 9 9 4.98 0.5
 4 -9 -9 7.75 0.59
 4 -9 9 5.76 0.46
 9 4 -9 5.22 0.29
 9 4 9 6.63 0.36
 -9 -5 0 1.89 0.37
 -5 9 0 1.44 0.39
 5 -9 0 1.04 0.41
 5 -9 0 0.43 0.39
 9 5 0 0.97 0.3
 -9 -5 -2 44.22 0.89
 -9 -5 2 52.28 1.33
 -5 9 -2 61.2 1.84
 -5 9 2 40.3 0.98
 5 -9 -2 51.2 1.31
 5 -9 -2 51.15 1.34
 5 -9 2 51.48 1.16
 5 -9 2 38.89 1.14
 9 5 -2 64.13 1.27
 9 5 2 52.85 0.99
 -9 -5 4 49.75 1.25
 -5 9 -4 62.25 1.76
 -5 9 4 45.55 1.09
 5 -9 -4 51.45 1.32
 5 -9 4 52.12 1.17
 9 5 -4 46.72 1.02
 9 5 4 85.4 1.22
 -9 -5 6 21.39 0.87
 -5 9 -6 25.63 1.16
 5 -9 -6 26.32 0.96
 5 -9 6 26.51 0.78
 9 5 -6 24.11 0.68
 9 5 6 38.63 0.78
 -9 -5 8 86.54 1.64
 -9 -5 8 112.25 1.45
 -5 9 -8 95.81 2.11
 5 -9 -8 91.24 1.64
 5 -9 8 89.65 1.2
 9 5 -8 105.23 1.11
 9 5 8 105.7 1.18
 -9 -5 10 12.76 0.71
 -9 -5 10 16.52 0.65
 -5 9 -10 15.91 0.98
 5 -9 -10 16.7 0.79
 5 -9 10 16.93 0.58
 9 5 10 17.13 0.56
 -9 -6 -1 421.72 2.91
 -9 -6 1 476 3.57
 -6 9 -1 534.37 5.53
 -6 9 1 463.22 2.95
 6 -9 -1 441.02 3.75
 6 -9 -1 413.65 3.64
 6 -9 1 510.15 3.8
 6 -9 1 376.24 3.43
 9 6 -1 403.3 2.88
 9 6 1 424.89 2.83
 -9 -6 -3 464.72 2.78
 -9 -6 3 479.76 3.89
 -6 9 -3 514.71 5.13
 -6 9 3 409.93 2.86
 6 -9 -3 449.07 3.81
 6 -9 -3 596.54 4.33
 6 -9 3 368.67 3.06
 9 6 -3 358.16 2.79
 9 6 3 654.49 3.43
 -9 -6 5 278.33 2.9
 -6 9 -5 368.45 4.25
 -6 9 5 340.43 2.88
 6 -9 -5 289.26 2.99
 6 -9 5 247.05 2.25
 9 6 -5 319.42 2.41
 9 6 5 486.72 2.87
 -9 -6 7 250.28 2.8
 -6 9 -7 311.7 3.9
 6 -9 -7 286.44 2.93
 6 -9 7 240.14 1.95
 9 6 -7 334.28 2.18
 9 6 7 338.3 2.28
 -9 -6 9 60.31 1.39
 -6 9 -9 66.17 1.88
 6 -9 -9 69.12 1.47
 6 -9 9 66.95 0.99
 9 6 -9 79.88 0.77
 9 6 9 74.77 1.1
 -9 -7 0 1.66 0.37
 -7 9 0 0.55 0.33
 -7 9 0 0.89 0.75
 7 -9 0 1.15 0.44
 7 -9 0 0.76 0.46
 9 7 0 1.01 0.33
 -9 -7 -2 440.1 2.92
 -9 -7 2 584.44 4.17
 -7 9 -2 541.89 3.71
 -7 9 -2 629.56 5.87
 -7 9 2 520.76 3.06
 7 -9 -2 492.25 4.08
 7 -9 -2 556.06 4.15
 7 -9 2 369.04 3.25
 9 7 -2 559.79 3.51
 9 7 2 532.7 3.2
 -9 -7 -4 1.81 0.34
 -9 -7 4 0.71 0.36
 -7 9 -4 0.94 0.62
 -7 9 4 1.09 0.29
 7 -9 -4 0.88 0.39
 7 -9 4 0.93 0.35
 9 7 -4 1.06 0.28
 9 7 4 0.88 0.33
 -9 -7 6 258.28 2.83
 -7 9 -6 317.08 4.13
 -7 9 6 336.45 2.77
 7 -9 -6 270.65 2.95
 7 -9 6 243.03 2.13
 9 7 -6 332.87 2.33
 9 7 6 381.25 2.63
 -9 -7 8 0.96 0.37
 -7 9 -8 1.78 0.62
 -7 9 8 0.66 0.4
 7 -9 -8 0.77 0.41
 7 -9 8 1.16 0.29
 9 7 -8 0.65 0.19
 9 7 8 1.25 0.32
 -9 -8 -1 358.77 2.84
 -9 -8 1 423.86 3.38
 -8 9 -1 408.29 3.36
 -8 9 -1 488.96 5.21
 -8 9 1 394.18 3.36
 -8 9 1 560.09 4.94
 -8 9 1 481.76 2.82
 8 -9 -1 371.23 3.62
 8 -9 -1 387.62 3.5
 8 -9 1 302.23 3.11
 9 8 -1 340.31 2.7
 9 8 1 423.56 2.94
 -9 -8 -3 351.63 2.63
 -9 -8 3 318.07 3.06
 -8 9 -3 338.86 4.34
 -8 9 3 299.51 3
 -8 9 3 324.67 2.41
 8 -9 -3 322.31 3.36
 8 -9 -3 402.56 3.37
 8 -9 3 240.03 2.55
 9 8 -3 340.57 2.76
 9 8 3 452.06 3.06
 -9 -8 5 295.32 2.97
 -8 9 -5 341.87 4.39
 -8 9 5 312.86 3.12
 -8 9 5 340.82 2.57
 8 -9 -5 290.13 3.15
 8 -9 5 236.88 2.25
 9 8 -5 348.12 2.53
 9 8 5 473.75 3.14
 -9 -8 7 111.5 1.91
 -8 9 -7 134 2.86
 -8 9 7 113.41 1.91
 8 -9 -7 122.59 2.06
 8 -9 7 104.36 1.35
 9 8 -7 134.33 1.37
 9 8 7 169.68 1.85
 -9 -9 0 0.98 0.33
 -9 9 0 0.51 0.37
 -9 9 0 0.92 0.52
 9 -9 0 0.56 0.44
 9 -9 0 0.64 0.37
 9 9 0 2.49 0.4
 -9 -9 -2 4.22 0.48
 -9 -9 2 3.25 0.52
 -9 9 -2 3.01 0.69
 -9 9 2 3.14 0.48
 -9 9 2 6.33 0.62
 9 -9 -2 3.12 0.56
 9 -9 -2 3.01 0.5
 9 -9 2 2.39 0.45
 9 9 2 4.37 0.48
 -9 -9 -4 39.31 0.96
 -9 -9 4 29.68 0.98
 -9 9 -4 36.25 1.62
 -9 9 4 40.01 1.19
 -9 9 4 36.1 0.86
 9 -9 -4 30.02 1.12
 9 -9 4 26.25 0.91
 9 9 -4 39.5 0.95
 9 9 4 53.52 1.14
 -9 -9 6 2.99 0.45
 -9 9 -6 4.32 0.88
 -9 9 6 3.91 0.55
 -9 9 6 3.82 0.45
 9 -9 -6 3.63 0.57
 9 -9 6 3.67 0.44
 9 9 -6 3.89 0.36
 9 9 6 5.36 0.54
 -9 -9 8 74.05 1.56
 -9 9 -8 88.23 2.43
 -9 9 8 89.47 1.71
 9 -9 -8 87.71 1.79
 9 -9 8 87.83 1.21
 9 9 -8 94.89 0.93
 9 9 8 105.66 1.54
 -10 9 -1 186.11 2.84
 -10 9 1 195.33 2.33
 -9 -10 -1 171.79 2.08
 -9 -10 1 171.62 2.22
 9 10 1 219.35 2.23
 10 -9 -1 198.62 2.81
 10 -9 -1 157.57 2.19
 10 -9 1 129.06 1.93
 -10 9 -3 159.46 2.93
 -10 9 3 194.66 2.36
 -10 9 3 196.86 1.85
 -9 -10 -3 181.59 2.03
 -9 -10 3 187.6 2.36
 9 10 -3 220.52 2.29
 9 10 3 218.73 2.25
 10 -9 -3 178.91 2.65
 10 -9 -3 190.68 2.37
 10 -9 3 115.91 1.74
 -10 9 -5 87.05 2.48
 -10 9 5 87.58 1.65
 -10 9 5 90.84 1.31
 -9 -10 5 75.94 1.52
 9 10 -5 90.72 1.31
 9 10 5 125.92 1.75
 10 -9 -5 89.74 1.92
 10 -9 5 79.18 1.43
 -10 9 -7 169.04 3.41
 -10 9 7 155.23 2.17
 -10 9 7 181.3 1.89
 -9 -10 7 135.23 2.02
 9 10 -7 191 1.54
 9 10 7 235.31 2.37
 10 -9 -7 174.39 2.57
 10 -9 7 155.65 1.77
 -10 8 0 44.76 1.2
 -10 8 0 58.81 1.54
 -8 -10 0 49.57 1.2
 8 10 0 59.03 1.18
 10 -8 0 35.61 1.06
 -10 8 -2 13.51 0.95
 -10 8 2 16.9 0.8
 -10 8 2 18.09 0.68
 -8 -10 -2 12.89 0.68
 -8 -10 2 13.9 0.76
 8 10 2 19.73 0.76
 10 -8 -2 12.92 0.88
 10 -8 -2 13.88 0.76
 10 -8 2 7.47 0.56
 -10 8 -4 41.71 1.67
 -10 8 4 48.25 1.23
 -10 8 4 49.01 1.01
 -8 -10 -4 45.73 1.07
 -8 -10 4 36.56 1.09
 8 10 -4 47.02 1.06
 8 10 4 66.58 1.29
 10 -8 -4 42.16 1.37
 10 -8 4 32.81 0.92
 -10 8 -6 2.29 0.81
 -10 8 6 2.73 0.46
 -10 8 6 2.51 0.35
 -8 -10 6 2.25 0.43
 8 10 -6 2.26 0.3
 8 10 6 3.18 0.48
 10 -8 -6 1.98 0.51
 10 -8 6 3.33 0.44
 -10 8 -8 67.5 2.3
 -10 8 8 62.19 1.39
 -8 -10 8 54.61 1.32
 8 10 8 77.01 1.37
 10 -8 -8 63.46 1.58
 -10 7 -1 536.49 3.94
 -10 7 -1 490.52 4.32
 -10 7 1 452.72 3.7
 -7 -10 -1 444.65 3.33
 -7 -10 1 417.82 3.41
 7 10 1 528.36 3.31
 10 -7 -1 502.49 4.43
 10 -7 -1 339.13 3.11
 10 -7 1 331.06 2.93
 -10 7 -3 379.87 4.34
 -10 7 3 508.25 3.82
 -10 7 3 502.17 3.23
 -7 -10 -3 392.78 3.06
 -7 -10 3 481.06 3.77
 7 10 -3 439.14 3.22
 7 10 3 611.39 3.67
 10 -7 -3 475.47 4.35
 10 -7 -3 430.59 3.42
 10 -7 3 453.88 3.31
 -10 7 -5 256.55 4.17
 -10 7 5 273.54 2.81
 -10 7 5 275.19 2.3
 -7 -10 -5 324.71 2.81
 -7 -10 5 250.59 2.67
 7 10 -5 306.77 2.48
 7 10 5 367.08 2.91
 10 -7 -5 270.22 3.26
 10 -7 5 275.14 2.17
 -10 7 -7 279.22 4.46
 -10 7 7 290.74 2.9
 -10 7 7 333.73 2.58
 -7 -10 7 242.16 2.65
 -7 -10 7 381.35 2.99
 7 10 -7 289.89 1.63
 7 10 7 325.83 2.73
 10 -7 -7 304.65 3.39
 -10 6 0 39.81 1.22
 -6 -10 0 42.65 1.1
 6 10 0 52.48 1.06
 10 -6 0 45.81 1.38
 10 -6 0 36.53 1.11
 -10 6 -2 3.39 0.64
 -10 6 2 3.38 0.51
 -10 6 2 4.34 0.5
 -6 -10 -2 3.21 0.43
 -6 -10 2 3.68 0.49
 6 10 -2 4.11 0.47
 6 10 2 5.24 0.48
 10 -6 -2 5.21 0.68
 10 -6 -2 3.2 0.5
 10 -6 2 3.5 0.49
 -10 6 -4 12.03 1.07
 -10 6 4 12.96 0.74
 -10 6 4 13.15 0.62
 -6 -10 -4 13.22 0.69
 -6 -10 4 11.32 0.69
 -6 -10 4 16.35 0.81
 6 10 -4 12.98 0.66
 6 10 4 18.62 0.77
 10 -6 -4 13.92 0.91
 10 -6 -4 11.45 0.67
 10 -6 4 14.89 0.63
 -10 6 -6 71.16 2.43
 -10 6 6 79.73 1.57
 -10 6 6 72.62 1.25
 -6 -10 -6 80.44 1.4
 -6 -10 6 63.87 1.38
 -6 -10 6 92.92 1.62
 6 10 -6 68.76 0.99
 6 10 6 86.06 1.44
 10 -6 -6 77.35 1.82
 -10 6 -8 2.7 0.9
 -10 6 8 1.96 0.43
 -6 -10 8 2.21 0.43
 -6 -10 8 2.5 0.45
 6 10 8 2.16 0.4
 10 -6 -8 1.26 0.44
 -10 5 -1 70.45 1.4
 -10 5 -1 50.04 1.36
 -10 5 1 46.71 1.28
 -5 -10 -1 53.33 1.23
 -5 -10 1 50.13 1.22
 5 10 -1 56.76 1.39
 5 10 1 61.61 1.14
 10 -5 -1 58.44 1.55
 10 -5 -1 60.99 1.5
 10 -5 1 57.44 1.31
 -10 5 -3 139.05 2.57
 -10 5 3 181.09 2.41
 -10 5 3 145.95 1.79
 -5 -10 -3 164.66 2.1
 -5 -10 3 156.32 2.1
 -5 -10 3 206.25 2.44
 5 10 -3 160.65 2.08
 5 10 3 244.12 2.34
 10 -5 -3 158.86 2.56
 10 -5 -3 143.8 2.01
 10 -5 3 213.09 2
 -10 5 -5 56.95 2
 -10 5 5 59.9 1.39
 -10 5 5 66.86 1.24
 -5 -10 -5 62.64 1.29
 -5 -10 5 52.18 1.27
 -5 -10 5 73.82 1.61
 5 10 -5 59.08 1.09
 5 10 5 68.41 1.27
 10 -5 -5 65.83 1.71
 10 -5 5 67.26 0.88
 -10 5 -7 241.92 4.34
 -10 5 7 182.29 2.32
 -10 5 7 203.58 2.06
 -5 -10 -7 178.5 1.91
 -5 -10 7 160.33 2.14
 -5 -10 7 253.07 2.79
 5 10 7 216.35 2.21
 10 -5 -7 211.55 2.83
 -10 5 -9 39.39 1.78
 -10 5 9 29.5 0.98
 -5 -10 9 40.97 1.15
 5 10 9 32.12 0.93
 10 -5 -9 31.95 1.06
 -10 4 0 750.47 4.99
 -4 -10 0 562.76 3.92
 4 10 0 659.82 4.92
 10 -4 0 559.77 4.48
 10 -4 0 760.76 4.73
 -10 4 -2 38.81 1.32
 -10 4 2 34.88 1.13
 -10 4 2 47.9 1.02
 -4 -10 -2 41.37 1.11
 -4 -10 2 36.99 1.06
 -4 -10 2 40.75 1.17
 4 10 -2 34.22 1.07
 4 10 2 62.11 1.18
 10 -4 -2 44.02 1.42
 10 -4 -2 48.28 1.33
 10 -4 2 54.12 1.1
 -10 4 -4 663.47 5.81
 -10 4 4 670.17 4.6
 -10 4 4 645.21 3.7
 -4 -10 -4 718.66 4.25
 -4 -10 4 697.82 4.41
 -4 -10 4 728.3 4.93
 4 10 -4 670.13 3.75
 4 10 4 958.82 4.6
 10 -4 -4 686.34 5.3
 10 -4 -4 587.59 3.78
 10 -4 4 726.16 2.89
 -10 4 -6 73.67 2.41
 -10 4 6 64.3 1.44
 -10 4 6 69.14 1.28
 -4 -10 -6 57.15 1.22
 -4 -10 6 51.43 1.23
 -4 -10 6 61.79 1.51
 4 10 -6 55.85 1.26
 4 10 -6 43.94 0.46
 4 10 6 63.75 1.24
 10 -4 -6 55.81 1.5
 -10 4 -8 556.7 6.03
 -10 4 8 428.43 3.53
 -4 -10 8 503.51 3.94
 4 10 8 388.31 2.99
 10 -4 -8 427.75 3.73
 -10 4 -10 52.99 1.97
 -10 4 10 38.46 1.12
 -4 -10 10 51.01 1.33
 4 10 10 32.99 0.9
 10 -4 -10 38.5 1.09
 -10 3 -1 100.17 1.5
 -10 3 -1 69.77 1.54
 -10 3 1 88.81 1.92
 -3 -10 -1 79.17 1.54
 -3 -10 1 73.39 1.45
 -3 -10 1 59.93 1.37
 3 10 -1 64.73 1.51
 3 10 1 83.57 1.87
 3 10 1 102.75 1.42
 10 -3 -1 81.23 1.87
 10 -3 -1 98.66 1.73
 10 -3 1 103.63 1.54
 -10 3 -3 79.04 1.96
 -10 3 3 68.74 1.53
 -10 3 3 71.93 1.3
 -3 -10 -3 77.62 1.45
 -3 -10 3 72.72 1.43
 -3 -10 3 68.18 1.59
 3 10 -3 75.38 1.39
 3 10 3 117 1.65
 10 -3 -3 76.1 1.86
 10 -3 -3 67.68 1.4
 10 -3 3 84.91 1.12
 -10 3 -5 94.37 2.37
 -10 3 5 88.73 1.71
 -10 3 5 89.52 1.46
 -3 -10 -5 93.43 1.59
 -3 -10 5 76.99 1.51
 -3 -10 5 77.67 1.78
 3 10 -5 90.66 1.68
 3 10 -5 78.95 0.93
 3 10 5 102.14 1.55
 10 -3 -5 86.03 1.82
 -10 3 -7 1.56 0.75
 -10 3 7 1.19 0.4
 -3 -10 -7 1.02 0.33
 -3 -10 7 0.74 0.47
 3 10 -7 0.94 0.37
 3 10 7 1.27 0.37
 10 -3 -7 1.17 0.42
 -10 3 -9 59.3 2.01
 -10 3 9 51.9 1.28
 -3 -10 9 49.77 1.34
 3 10 9 40.57 0.99
 10 -3 -9 54.57 1.33
 -10 2 0 294.03 2.7
 -2 -10 0 251.36 2.73
 -2 -10 0 204.02 2.42
 2 10 0 208.43 2.64
 10 -2 0 218.63 3
 10 -2 0 322.29 2.79
 -10 2 -2 3.69 0.61
 -10 2 2 2.84 0.58
 -2 -10 -2 2.39 0.41
 -2 -10 2 2.11 0.42
 -2 -10 2 2.11 0.52
 2 10 -2 1.6 0.42
 2 10 2 2.93 0.52
 2 10 2 2.89 0.4
 10 -2 -2 2.05 0.54
 10 -2 -2 1.91 0.43
 10 -2 2 3.75 0.43
 -10 2 -4 309.67 3.78
 -10 2 4 268.98 2.95
 -10 2 4 247.08 2.32
 -2 -10 -4 338.4 2.97
 -2 -10 4 300.03 2.85
 -2 -10 4 335.21 3.41
 2 10 -4 313.05 2.17
 2 10 4 429.13 3.1
 10 -2 -4 284.68 3.2
 10 -2 -4 281.81 2.55
 10 -2 4 333.5 1.68
 -10 2 -6 46.61 1.73
 -10 2 6 53.92 1.37
 -10 2 6 57.33 1.2
 -2 -10 -6 49.04 1.15
 -2 -10 6 42.68 1.16
 -2 -10 6 55.15 1.5
 2 10 -6 43.7 1.19
 2 10 6 55.07 1.18
 10 -2 -6 40.69 1.22
 -10 2 -8 229.47 3.72
 -10 2 8 256.83 2.91
 -2 -10 -8 176.65 1.93
 -2 -10 8 194.43 2.61
 2 10 -8 199.5 2.37
 2 10 8 178.01 1.97
 10 -2 -8 211.51 2.51
 -10 2 -10 23.54 1.3
 -10 2 10 20.01 0.86
 -2 -10 10 17.29 0.92
 2 10 10 14.15 0.63
 10 -2 -10 22.49 0.88
 10 -2 -10 16.34 0.46
 -10 1 -1 211.38 2.03
 -10 1 -1 213.46 2.54
 -10 1 1 155.51 2.1
 -1 -10 -1 165.48 2.14
 -1 -10 -1 155.33 2.08
 -1 -10 1 152.97 2.09
 -1 -10 1 151.39 2.17
 1 10 -1 129.89 1.97
 1 10 1 153.88 2.27
 10 -1 -1 136.24 2.19
 10 -1 -1 202.76 2.21
 10 -1 1 129.64 2.17
 10 -1 1 212.44 2.11
 -10 1 -3 72.38 1.88
 -10 1 3 64.38 1.59
 -10 1 3 58.78 1.14
 -1 -10 -3 66.6 1.37
 -1 -10 3 55.52 1.3
 -1 -10 3 73.38 1.64
 1 10 -3 62.51 1.14
 1 10 3 100.04 1.52
 10 -1 -3 53.3 1.38
 10 -1 -3 72.41 1.38
 10 -1 3 73.51 0.99
 -10 1 -5 117.45 2.47
 -10 1 5 102.12 1.86
 -10 1 5 94.43 1.48
 -1 -10 -5 115.6 1.77
 -1 -10 5 107.29 1.75
 -1 -10 5 117.73 2.01
 1 10 -5 113.27 1.93
 1 10 5 121.45 1.71
 10 -1 -5 96.24 1.78
 -10 1 -7 2.78 0.71
 -10 1 7 4.37 0.58
 -1 -10 -7 3.43 0.45
 -1 -10 7 3.64 0.59
 1 10 -7 2.92 0.5
 1 10 7 3.42 0.44
 10 -1 -7 2.55 0.46
 -10 1 -9 100.04 2.42
 -10 1 9 107.93 1.93
 -1 -10 -9 72.31 1.24
 -1 -10 9 90.89 1.76
 1 10 -9 78.91 1.59
 1 10 9 64.74 1.19
 10 -1 -9 93.07 1.61
 10 -1 -9 67.86 1
 -10 0 0 943.35 4.86
 0 -10 0 809.79 4.67
 0 -10 0 1001.8 5.51
 0 10 0 666.48 4.4
 10 0 0 533.9 4.17
 10 0 0 1038.62 4.85
 -10 0 -2 4.33 0.32
 -10 0 -2 4.15 0.63
 -10 0 2 4.19 0.53
 0 -10 -2 4.02 0.49
 0 -10 2 2.95 0.45
 0 -10 2 3.7 0.59
 0 10 -2 3.24 0.43
 0 10 2 3.23 0.5
 0 10 2 6.62 0.54
 10 0 -2 2.53 0.46
 10 0 -2 4.46 0.52
 10 0 2 5.35 0.46
 -10 0 -4 838.96 6.42
 -10 0 4 636.7 4.62
 -10 0 4 697.6 3.94
 0 -10 -4 889.15 4.96
 0 -10 4 744.69 4.7
 0 -10 4 954.81 5.66
 0 10 -4 885.62 5.51
 0 10 4 1026.5 4.89
 10 0 -4 708.93 4.68
 10 0 -4 834.61 4.43
 10 0 4 1059.71 3.16
 -10 0 -6 5.73 0.85
 -10 0 6 4.48 0.57
 -10 0 6 6.58 0.57
 0 -10 -6 4.96 0.52
 0 -10 6 6.2 0.71
 0 10 -6 4.74 0.57
 0 10 6 5.04 0.52
 10 0 -6 3.52 0.46
 -10 0 -8 513.05 5.27
 -10 0 8 510.82 4.1
 0 -10 -8 407.48 3.06
 0 -10 8 547.11 4.09
 0 10 -8 408.29 3.57
 0 10 8 347.61 2.68
 10 0 -8 448.4 3.45
 10 0 -8 352.89 2.44
 -10 0 -10 10.02 0.98
 -10 0 10 14.81 0.82
 0 -10 10 11.53 0.78
 0 10 -10 9.38 0.72
 0 10 10 8.16 0.55
 10 0 -10 13.46 0.69
 10 0 -10 8.48 0.33
 -10 -1 -1 806.49 3.89
 -10 -1 1 581.81 3.9
 -1 10 -1 453.22 3.2
 -1 10 1 443.11 3.62
 1 -10 -1 712.58 4.41
 1 -10 -1 880.81 5.25
 1 -10 1 616.03 3.99
 1 -10 1 739.56 4.84
 10 1 -1 571.88 4.34
 10 1 -1 840.21 4.5
 10 1 1 531.22 4.35
 10 1 1 731.1 3.77
 -10 -1 -3 831.33 5.62
 -10 -1 3 621.22 4.36
 -1 10 3 601.64 4.47
 -1 10 3 1081.3 4.92
 1 -10 -3 811.54 4.79
 1 -10 3 725.19 4.38
 1 -10 3 936.94 5.51
 10 1 -3 588.14 4.24
 10 1 -3 763.3 4.15
 10 1 3 763.1 3.19
 -10 -1 -5 449.03 4.89
 -10 -1 5 437.64 3.74
 -10 -1 5 370.29 2.9
 -1 10 -5 479.59 4.06
 -1 10 5 587.18 3.81
 1 -10 -5 470.71 3.6
 1 -10 5 501.31 3.92
 10 1 -5 417.62 3.45
 10 1 5 680.15 2.33
 -10 -1 -7 617.6 5.74
 -1 10 -7 643.57 4.6
 -1 10 7 523.6 3.32
 1 -10 -7 532.16 3.67
 1 -10 7 815.44 4.93
 10 1 -7 708.84 4.35
 10 1 -7 548.68 3.33
 -10 -1 -9 248 3.75
 -10 -1 9 259.5 2.91
 -1 10 -9 212.33 2.69
 -1 10 9 178 1.93
 1 -10 -9 211.36 2.22
 1 -10 9 261.55 2.77
 10 1 -9 244.86 2.51
 10 1 -9 184.14 1.48
 -10 -2 0 107.36 1.72
 -2 10 0 46.27 1.04
 2 -10 0 95.38 1.66
 2 -10 0 94.04 1.78
 10 2 0 85.87 1.93
 10 2 0 85.46 1.41
 -10 -2 -2 7.59 0.41
 -10 -2 2 7.41 0.56
 -2 10 -2 8.89 0.42
 -2 10 -2 7.82 0.56
 -2 10 2 5.46 0.59
 2 -10 -2 8.53 0.64
 2 -10 -2 8.72 0.77
 2 -10 2 7.67 0.58
 2 -10 2 7.99 0.72
 10 2 -2 8.18 0.67
 10 2 -2 8.15 0.61
 10 2 2 8.15 0.49
 -10 -2 4 45.57 1.25
 -2 10 -4 53.69 1.51
 -2 10 4 51.52 1.41
 -2 10 4 71.5 1.4
 2 -10 -4 52.41 1.3
 2 -10 4 44.2 1.11
 2 -10 4 65.24 1.51
 10 2 -4 48.86 1.29
 10 2 -4 47.41 1.08
 10 2 4 81.87 1.08
 -10 -2 6 39.52 1.15
 -10 -2 6 40.99 1.03
 -2 10 -6 50.62 1.42
 -2 10 6 48.62 1.08
 2 -10 -6 44.37 1.17
 2 -10 6 59.48 1.37
 10 2 -6 51.19 1.25
 10 2 -6 39.11 0.97
 10 2 6 68.45 0.75
 -10 -2 8 41.47 1.18
 -2 10 -8 44.28 1.32
 -2 10 8 43.34 1
 2 -10 -8 42.45 1.1
 2 -10 8 60 1.37
 10 2 -8 42.88 0.82
 -10 -2 10 70.33 1.49
 -2 10 -10 61.19 1.54
 -2 10 10 70.04 1.25
 2 -10 -10 67.25 1.29
 2 -10 10 74.62 1.43
 10 2 -10 70.11 0.73
 -10 -3 -1 1.18 0.29
 -10 -3 1 1.28 0.4
 -3 10 -1 1.88 0.37
 -3 10 1 0.94 0.28
 3 -10 -1 1.54 0.46
 3 -10 -1 0.51 0.41
 3 -10 1 2.52 0.43
 3 -10 1 0.46 0.42
 10 3 -1 0.91 0.53
 10 3 -1 3.75 0.47
 10 3 1 0.34 0.46
 10 3 1 0.39 0.29
 -10 -3 3 9.31 0.65
 -3 10 -3 12.48 0.93
 -3 10 3 7.65 0.58
 3 -10 -3 12.24 0.77
 3 -10 3 10.75 0.59
 3 -10 3 14.7 0.87
 10 3 -3 11.58 0.77
 10 3 -3 12.59 0.67
 10 3 3 15.72 0.59
 -10 -3 5 28.59 1.04
 -3 10 -5 33.04 1.24
 3 -10 -5 30.45 1.01
 3 -10 5 41.41 1.22
 10 3 -5 34.96 1.12
 10 3 -5 23.82 0.79
 10 3 5 53.68 0.88
 -10 -3 7 6.29 0.58
 -3 10 -7 5.51 0.68
 -3 10 7 5.88 0.49
 3 -10 -7 6.66 0.57
 3 -10 7 7.92 0.6
 10 3 -7 6.63 0.42
 10 3 7 9.99 0.39
 -10 -3 9 4.78 0.49
 -3 10 -9 5.42 0.65
 -3 10 9 5.62 0.49
 3 -10 -9 6.06 0.56
 3 -10 9 6.74 0.55
 10 3 -9 5.03 0.3
 -10 -4 0 313.93 2.71
 -4 10 0 264.68 2.25
 4 -10 0 350.06 3.23
 4 -10 0 309.86 3.15
 10 4 0 312.45 2.53
 -10 -4 -2 5.95 0.41
 -10 -4 2 2.28 0.43
 -4 10 -2 2.11 0.66
 -4 10 2 1.48 0.32
 4 -10 -2 2.26 0.47
 4 -10 -2 2.98 0.53
 4 -10 2 2.05 0.42
 4 -10 2 2.6 0.51
 10 4 -2 3.3 0.49
 10 4 2 16.07 0.61
 -10 -4 4 228.12 2.63
 -4 10 -4 327.58 3.72
 -4 10 4 171.56 2.13
 4 -10 -4 291.73 3.01
 4 -10 4 367.2 3.44
 10 4 -4 234.09 2.35
 10 4 4 431.41 2.65
 -10 -4 6 9.42 0.68
 -4 10 -6 10.18 0.79
 4 -10 -6 10.07 0.67
 4 -10 6 12.94 0.7
 10 4 -6 10.35 0.51
 10 4 6 16.72 0.55
 -10 -4 8 214.7 2.53
 -4 10 -8 235.65 3.1
 4 -10 -8 230.03 2.53
 4 -10 8 269.63 2.39
 10 4 -8 257.06 1.83
 10 4 8 290.72 1.81
 -10 -4 10 8.5 0.62
 -4 10 -10 9.89 0.84
 4 -10 -10 11.24 0.69
 4 -10 10 10.92 0.59
 10 4 -10 11.34 0.3
 -10 -5 -1 52.49 1.05
 -10 -5 1 59.4 1.36
 -5 10 1 43.67 0.95
 5 -10 -1 65.09 1.58
 5 -10 -1 50.04 1.35
 5 -10 1 59.99 1.37
 5 -10 1 43.41 1.28
 10 5 -1 48.2 1.09
 10 5 1 47.32 1.01
 -10 -5 -3 75.43 1.09
 -10 -5 3 71.98 1.53
 -5 10 -3 85.36 2.07
 -5 10 3 61.76 1.22
 5 -10 -3 78.29 1.66
 5 -10 -3 99.58 1.86
 5 -10 3 72.78 1.55
 10 5 -3 96.2 1.57
 10 5 3 102.58 1.39
 -10 -5 5 73.28 1.54
 -5 10 -5 99.83 2.16
 -5 10 5 75.79 1.43
 5 -10 -5 78.75 1.61
 5 -10 5 91.88 1.56
 10 5 -5 82.48 1.29
 10 5 5 146.62 1.59
 -10 -5 7 67.37 1.49
 -5 10 -7 79.53 1.92
 5 -10 -7 73.3 1.52
 5 -10 7 82.89 1.36
 10 5 -7 77.12 1.11
 10 5 7 116.41 1.31
 -10 -5 9 19.63 0.84
 -5 10 -9 23.3 1.12
 5 -10 -9 26.94 0.96
 5 -10 9 26.84 0.78
 10 5 -9 27.63 0.55
 10 5 9 31.89 0.73
 -10 -6 0 368.53 2.93
 -6 10 0 457.27 2.62
 6 -10 0 384.17 3.54
 6 -10 0 340.12 3.39
 10 6 0 363.09 2.76
 -10 -6 -2 1.3 0.3
 -10 -6 2 0.83 0.39
 -6 10 -2 0.42 0.58
 -6 10 2 0.31 0.25
 6 -10 -2 1.94 0.46
 6 -10 -2 0.73 0.46
 6 -10 2 0.55 0.4
 10 6 -2 0.96 0.37
 10 6 2 1.54 0.34
 -10 -6 4 392.21 3.48
 -6 10 -4 481.24 4.85
 -6 10 4 394.8 2.99
 6 -10 -4 380.95 3.56
 6 -10 4 344.88 2.98
 10 6 -4 338.71 2.63
 10 6 4 651.07 3.5
 -10 -6 6 11.34 0.7
 -6 10 -6 14.92 1.04
 6 -10 -6 10.92 0.69
 6 -10 6 10.84 0.59
 10 6 -6 14.06 0.55
 10 6 6 21.74 0.71
 -10 -6 8 256.3 2.83
 -6 10 -8 308.27 3.82
 6 -10 -8 304.86 3.04
 6 -10 8 262.27 2.2
 10 6 -8 367.97 2.11
 10 6 8 414.49 2.58
 -10 -7 -1 23.21 0.79
 -10 -7 1 24.12 0.9
 -7 10 -1 20.93 0.81
 -7 10 -1 36.3 1.77
 -7 10 1 32.59 0.98
 7 -10 -1 27.5 1.1
 7 -10 -1 26.44 1.12
 7 -10 1 27.68 1.04
 7 -10 1 19.03 0.93
 10 7 -1 24.44 0.82
 10 7 1 24.42 0.8
 -10 -7 -3 6.14 0.46
 -10 -7 3 6.13 0.6
 -7 10 -3 6.53 0.92
 -7 10 3 5.43 0.43
 7 -10 -3 5.96 0.62
 7 -10 -3 9.31 0.75
 7 -10 3 4.29 0.52
 10 7 3 8.07 0.54
 -10 -7 5 2.58 0.47
 -7 10 -5 4.97 0.83
 -7 10 5 3.11 0.4
 7 -10 -5 3.25 0.51
 7 -10 5 2.14 0.4
 10 7 -5 2.9 0.34
 10 7 5 5.57 0.52
 -10 -7 7 9.04 0.67
 -7 10 -7 12.01 0.98
 7 -10 -7 10.84 0.74
 7 -10 7 9.36 0.55
 10 7 -7 10.87 0.47
 10 7 7 15.05 0.64
 -10 -8 0 132.38 1.84
 -8 10 0 118.42 1.83
 -8 10 0 202.49 3.38
 8 -10 0 138.88 2.21
 8 -10 0 120.02 2.15
 10 8 0 138.86 1.78
 -10 -8 -2 57.45 1.14
 -10 -8 2 56.46 1.34
 -8 10 -2 69.26 2.17
 -8 10 2 53.35 1.31
 -8 10 2 63.53 1.13
 8 -10 -2 57.19 1.52
 8 -10 -2 63.45 1.52
 8 -10 2 43.42 1.21
 10 8 2 71.52 1.28
 -10 -8 4 44.18 1.2
 -8 10 -4 51.77 1.84
 -8 10 4 44.48 1.26
 -8 10 4 46.72 0.97
 8 -10 -4 44.61 1.32
 8 -10 4 32.77 0.99
 10 8 -4 43.29 0.97
 10 8 4 63.06 1.22
 -10 -8 6 40.12 1.18
 -8 10 -6 51.1 1.82
 -8 10 6 48.79 1.32
 -8 10 6 52.53 1.09
 8 -10 -6 39.84 1.26
 8 -10 6 40.04 1
 10 8 -6 50.58 0.95
 10 8 6 73.91 1.31
 -10 -8 8 63.88 1.49
 -8 10 -8 74.84 2.16
 -8 10 8 67.39 1.51
 8 -10 -8 73.04 1.62
 8 -10 8 74.33 1.19
 10 8 -8 78.65 0.96
 10 8 8 94.11 1.42
 -10 -9 -1 495.27 3.42
 -10 -9 1 531.92 3.84
 -9 10 -1 533.49 3.79
 -9 10 -1 615.06 5.51
 -9 10 1 482.42 3.63
 -9 10 1 640.54 4.87
 9 -10 -1 497.38 4.3
 9 -10 -1 450.38 3.88
 9 -10 1 384.1 3.51
 10 9 1 517.83 3.4
 -10 -9 -3 416.89 2.92
 -10 -9 3 416.21 3.5
 -9 10 -3 510.34 5.55
 -9 10 3 469.28 3.8
 -9 10 3 460.43 2.8
 9 -10 -3 449.41 4.1
 9 -10 -3 558.58 4.09
 9 -10 3 323.29 3.05
 10 9 3 569 3.57
 -10 -9 5 322.18 3.06
 -9 10 -5 358.82 4.69
 -9 10 5 352.26 3.37
 -9 10 5 399.63 2.69
 9 -10 -5 368.25 3.68
 9 -10 5 344.28 2.92
 10 9 -5 421.93 2.79
 10 9 5 559.03 3.53
 -10 -9 7 192.59 2.43
 -9 10 -7 225.8 3.8
 -9 10 7 227.32 2.72
 -9 10 7 217.29 2.12
 9 -10 -7 209.54 2.75
 9 -10 7 215.62 2.11
 10 9 -7 251.7 1.87
 10 9 7 314.53 2.66
 -10 -10 0 133.24 1.91
 -10 10 0 162.02 2.56
 10 -10 0 104.5 1.82
 -10 -10 -2 2.73 0.41
 -10 -10 2 2.87 0.49
 -10 10 -2 3.5 0.72
 -10 10 2 2.65 0.46
 10 -10 -2 3.06 0.57
 10 -10 -2 2.14 0.51
 10 -10 2 2.65 0.48
 10 10 2 2.96 0.45
 -10 -10 -4 86.57 1.36
 -10 -10 4 75.75 1.51
 -10 10 -4 83.1 2.4
 -10 10 4 83.61 1.61
 -10 10 4 89.35 1.25
 10 -10 -4 86.02 1.88
 10 -10 4 73.13 1.49
 10 10 -4 97.96 1.45
 10 10 4 119.8 1.71
 -10 -10 6 0.51 0.34
 -10 10 -6 0.53 0.66
 -10 10 6 0.31 0.38
 -10 10 6 0.3 0.26
 10 -10 -6 0.96 0.47
 10 -10 6 0.97 0.38
 10 10 -6 0.35 0.23
 10 10 6 0.94 0.39
 -11 10 1 209.16 2.36
 -10 -11 -1 185.07 2.2
 -10 -11 1 190.12 2.38
 11 -10 -1 198.9 2.84
 11 -10 -1 188.81 2.41
 11 -10 1 140.46 2.04
 -11 10 -3 129.98 2.64
 -11 10 3 156.32 2.09
 -11 10 3 180.32 1.54
 -10 -11 -3 134.27 1.78
 -10 -11 3 148.38 2.13
 10 11 3 180.27 2.12
 11 -10 -3 147.85 2.5
 11 -10 3 117.17 1.86
 -11 9 0 0.84 0.4
 -9 -11 0 0.53 0.34
 11 -9 0 1.2 0.41
 -11 9 -2 713.49 5.67
 -11 9 2 646.25 4.19
 -9 -11 -2 635.92 3.96
 -9 -11 2 653.25 4.51
 9 11 2 868.33 4.51
 11 -9 -2 679.12 5.3
 11 -9 -2 615.91 4.29
 11 -9 2 398.14 3.24
 -11 9 -4 1.68 0.63
 -11 9 4 3.2 0.48
 -11 9 4 1.15 0.28
 -9 -11 -4 1.6 0.38
 -9 -11 4 0.86 0.38
 9 11 -4 0.73 0.29
 9 11 4 1.41 0.41
 11 -9 -4 1.87 0.51
 11 -9 4 0.65 0.33
 -11 9 -6 498.25 5.96
 -11 9 6 525.42 3.9
 -11 9 6 574.09 3.17
 -9 -11 6 399.64 3.39
 9 11 -6 574.42 2.95
 9 11 6 735.16 4.25
 11 -9 -6 559.73 4.72
 11 -9 6 522.09 3.5
 -11 8 1 3.47 0.53
 -8 -11 -1 2.66 0.43
 -8 -11 1 3.4 0.5
 11 -8 -1 3.53 0.66
 11 -8 -1 2.51 0.47
 11 -8 1 1.57 0.4
 -11 8 -3 5.07 0.78
 -11 8 3 6.47 0.58
 -11 8 3 5.37 0.54
 -8 -11 -3 5.39 0.53
 -8 -11 3 5.37 0.54
 8 11 -3 6.04 0.51
 8 11 3 7.61 0.58
 11 -8 -3 6.27 0.77
 11 -8 -3 5.95 0.61
 11 -8 3 3.68 0.47
 -11 8 -5 0.78 0.67
 -11 8 5 1.94 0.42
 -11 8 5 1.43 0.29
 -8 -11 -5 2.82 0.46
 -8 -11 5 1.07 0.36
 8 11 -5 1.86 0.3
 8 11 5 2.97 0.47
 11 -8 -5 1.97 0.51
 11 -8 5 1.45 0.39
 -11 8 -7 1.43 0.79
 -11 8 7 0.74 0.39
 -11 8 7 1.47 0.31
 -8 -11 7 1.78 0.42
 8 11 -7 0.61 0.18
 8 11 7 1.08 0.41
 11 -8 -7 0.39 0.41
 11 -8 7 1.47 0.39
 -11 7 0 0.36 0.42
 -7 -11 0 0.28 0.32
 11 -7 0 0.4 0.32
 -11 7 -2 304.73 3.65
 -11 7 2 291.89 3.06
 -7 -11 -2 274.67 2.67
 -7 -11 2 252.83 2.74
 7 11 -2 298.6 2.76
 7 11 2 359.5 2.84
 11 -7 -2 319.1 3.69
 11 -7 -2 263.54 2.84
 11 -7 2 250.91 2.59
 -11 7 -4 0.34 0.59
 -11 7 4 0.44 0.35
 -11 7 4 0.46 0.26
 -7 -11 -4 0.46 0.33
 -7 -11 4 0.73 0.37
 7 11 -4 0.49 0.29
 7 11 4 1 0.39
 11 -7 -4 1.04 0.47
 11 -7 4 1.11 0.38
 -11 7 -6 159.82 3.46
 -11 7 6 204.89 1.97
 -7 -11 6 138.07 2
 7 11 -6 174.14 1.57
 7 11 6 259.98 2.56
 11 -7 -6 191.23 2.83
 11 -7 6 211.55 1.88
 -11 6 1 310.95 3.14
 -6 -11 -1 309 2.89
 -6 -11 1 330.86 3.08
 6 11 -1 375.94 3.26
 6 11 1 389.15 2.87
 11 -6 -1 384.91 3.94
 11 -6 -1 285.65 2.94
 11 -6 1 353.99 3.28
 -11 6 -3 250.25 3.46
 -11 6 3 336.76 3.28
 -11 6 3 323.39 2.62
 -6 -11 -3 280.88 2.74
 -6 -11 3 281.61 2.88
 6 11 -3 306.95 2.78
 6 11 3 410.25 3.08
 11 -6 -3 296.18 3.57
 11 -6 -3 284.23 2.88
 11 -6 3 287.26 2.55
 -11 6 -5 333.91 4.57
 -11 6 5 399.51 3.41
 -11 6 5 406.38 2.75
 -6 -11 -5 457.66 3.5
 -6 -11 5 376.52 3.28
 6 11 -5 425.6 2.88
 6 11 5 550.09 3.66
 11 -6 -5 436.24 4.4
 11 -6 5 498.05 2.84
 -11 6 -7 208.19 4.21
 -11 6 7 159.19 2.17
 -11 6 7 191.39 1.96
 -6 -11 7 135.99 1.98
 -6 -11 7 229.03 2.52
 6 11 7 186.31 2.15
 11 -6 -7 167.48 2.56
 -11 5 0 0.79 0.45
 -5 -11 0 1.62 0.41
 5 11 0 0.86 0.4
 11 -5 0 0.4 0.46
 -11 5 -2 7.05 0.8
 -11 5 2 7.68 0.66
 -5 -11 -2 7.69 0.6
 -5 -11 2 6.2 0.54
 5 11 -2 7.2 0.62
 5 11 2 11.35 0.64
 11 -5 -2 9.2 0.85
 11 -5 -2 7.56 0.69
 11 -5 2 10.52 0.66
 -11 5 -4 2 0.64
 -11 5 4 1.32 0.43
 -11 5 4 1.42 0.34
 -5 -11 -4 1.05 0.38
 -5 -11 4 1.33 0.39
 -5 -11 4 1.08 0.48
 5 11 -4 1.28 0.31
 5 11 4 4.2 0.51
 11 -5 -4 1.42 0.54
 11 -5 -4 1.17 0.4
 11 -5 4 1.16 0.36
 -11 5 -6 2.08 0.73
 -11 5 6 1.27 0.39
 -11 5 6 1.91 0.34
 -5 -11 -6 3.15 0.48
 -5 -11 6 0.94 0.35
 -5 -11 6 2.9 0.57
 5 11 -6 2.03 0.24
 5 11 6 2.34 0.42
 11 -5 -6 2.05 0.53
 -11 5 -8 10.7 1.25
 -11 5 8 7.48 0.62
 -5 -11 8 12.98 0.82
 5 11 8 9.46 0.62
 11 -5 -8 9.53 0.69
 -11 4 -1 339.64 2.75
 -11 4 1 281.63 3.36
 -4 -11 -1 263.84 2.79
 -4 -11 1 223.67 2.52
 4 11 -1 234.15 2.77
 11 -4 -1 280.73 3.41
 11 -4 -1 320.44 3.31
 11 -4 1 319.78 2.84
 -11 4 -3 271.23 3.52
 -11 4 3 307.76 3.16
 -11 4 3 264.94 2.34
 -4 -11 -3 305.62 2.97
 -4 -11 3 243.21 2.64
 -4 -11 3 310.43 3.1
 4 11 -3 252.96 2.52
 4 11 3 404.52 3.07
 11 -4 -3 290.47 3.53
 11 -4 -3 261.01 2.71
 11 -4 3 320.39 2.5
 -11 4 -5 291.28 4.14
 -11 4 5 338.68 3.34
 -11 4 5 260.48 2.35
 -4 -11 -5 317.11 2.97
 -4 -11 5 286.22 2.93
 -4 -11 5 333.35 3.44
 4 11 -5 312.97 3.1
 4 11 -5 288.91 1.99
 4 11 5 375.69 3.02
 11 -4 -5 304.57 3.51
 11 -4 5 339.69 1.98
 -11 4 -7 141.61 3.08
 -11 4 7 117.87 1.93
 -11 4 7 126.62 1.64
 -4 -11 -7 101.03 1.57
 -4 -11 7 95.91 1.67
 -4 -11 7 129.66 2.13
 4 11 7 129.05 1.8
 11 -4 -7 113.79 2.04
 -11 4 -9 142.9 3.16
 -11 4 9 127.42 1.96
 -4 -11 9 154.79 2.26
 4 11 9 115.84 1.7
 11 -4 -9 120.99 1.96
 -11 3 0 1.24 0.38
 -3 -11 0 1 0.4
 3 11 0 1.82 0.48
 11 -3 0 2.38 0.6
 11 -3 0 0.63 0.39
 -11 3 2 1.55 0.48
 -3 -11 -2 1.39 0.41
 -3 -11 2 0.94 0.37
 -3 -11 2 1.51 0.46
 3 11 -2 0.68 0.34
 3 11 2 1.98 0.39
 11 -3 -2 1.82 0.56
 11 -3 -2 1.34 0.48
 11 -3 2 1.81 0.4
 -11 3 -4 25.8 1.27
 -11 3 4 26.72 1.03
 -11 3 4 21.3 0.76
 -3 -11 -4 24.65 0.93
 -3 -11 4 22.48 0.9
 -3 -11 4 23.63 1.08
 3 11 -4 25.42 0.74
 3 11 4 38.38 1.06
 11 -3 -4 24.47 1.08
 11 -3 -4 20.24 0.78
 11 -3 4 31.22 0.73
 -11 3 -6 9.04 1.03
 -11 3 6 9.75 0.73
 -11 3 6 9.7 0.61
 -3 -11 -6 8.15 0.61
 -3 -11 6 8.03 0.64
 -3 -11 6 8.93 0.8
 3 11 -6 8.35 0.67
 3 11 6 10.49 0.64
 11 -3 -6 7.22 0.69
 -11 3 -8 67.98 2.2
 -11 3 8 67.05 1.51
 -3 -11 -8 46.96 1.06
 -3 -11 8 53.96 1.45
 3 11 8 58.99 1.25
 11 -3 -8 55.25 1.39
 -11 2 -1 125.95 1.61
 -11 2 1 95.64 1.73
 -2 -11 -1 107.2 1.84
 -2 -11 1 88.56 1.69
 -2 -11 1 90.18 1.73
 2 11 -1 76.12 1.63
 2 11 1 85.19 1.81
 11 -2 -1 85.9 1.89
 11 -2 -1 115.35 1.8
 11 -2 1 115.05 1.68
 -11 2 -3 73.68 1.87
 -11 2 3 74.2 1.69
 -11 2 3 69.08 1.23
 -2 -11 -3 79.43 1.55
 -2 -11 3 69.48 1.46
 -2 -11 3 77.8 1.74
 2 11 -3 75.75 1.31
 2 11 3 124.42 1.76
 11 -2 -3 71.76 1.7
 11 -2 -3 78.28 1.54
 11 -2 3 85.7 1.22
 -11 2 -5 163.7 2.93
 -11 2 5 188.77 2.51
 -11 2 5 157.71 1.85
 -2 -11 -5 181.13 2.32
 -2 -11 5 163.25 2.19
 -2 -11 5 188.06 2.65
 2 11 -5 184.19 2.49
 2 11 5 238.01 2.44
 11 -2 -5 155.84 2.35
 11 -2 5 163.97 1.19
 -11 2 -7 18.49 1.23
 -11 2 7 20.67 0.95
 -11 2 7 19.67 0.78
 -2 -11 -7 14.61 0.71
 -2 -11 7 20.78 1.04
 2 11 -7 16.39 0.84
 2 11 7 18.27 0.79
 11 -2 -7 17.47 0.84
 -11 2 -9 285.76 4.18
 -11 2 9 278.15 2.98
 -2 -11 9 193.49 2.6
 2 11 9 191.93 2.09
 11 -2 -9 256.57 2.71
 -11 1 0 3.06 0.45
 -1 -11 0 5.51 0.6
 -1 -11 0 1.49 0.46
 1 11 0 1.59 0.43
 11 -1 0 1.68 0.46
 11 -1 0 5.03 0.58
 -11 1 2 665.65 4.64
 -1 -11 -2 805.96 4.84
 -1 -11 2 786.8 4.95
 -1 -11 2 802.63 5.12
 1 11 -2 691.23 4.23
 1 11 2 551.53 4.44
 11 -1 -2 603.22 4.55
 11 -1 -2 819.18 4.58
 11 -1 2 860.28 4.08
 -11 1 -4 28.31 1.31
 -11 1 4 27.72 1.06
 -11 1 4 24.44 0.83
 -1 -11 -4 30.03 1.03
 -1 -11 4 26.58 0.97
 -1 -11 4 27.75 1.11
 1 11 -4 30.63 1.17
 1 11 -4 27.3 0.47
 1 11 4 38.89 1.07
 11 -1 -4 24.42 0.99
 11 -1 -4 27.34 0.91
 11 -1 4 28.34 0.64
 -11 1 -6 697.2 5.96
 -11 1 6 836.16 5.28
 -11 1 6 756 4.04
 -1 -11 -6 699.63 4.36
 -1 -11 6 719.37 5.01
 1 11 -6 647.32 4.57
 1 11 6 856.07 4.61
 11 -1 -6 657.97 4.55
 -11 1 -8 43.97 1.71
 -11 1 8 48.68 1.36
 -1 -11 -8 34.89 0.98
 -1 -11 8 44.45 1.37
 1 11 -8 36.78 1.16
 1 11 8 35.99 0.97
 11 -1 -8 37.25 1.09
 -11 0 -1 1.2 0.34
 -11 0 1 0.28 0.32
 0 -11 -1 0.76 0.37
 0 -11 -1 0.3 0.4
 0 -11 1 0.74 0.35
 0 -11 1 0.84 0.46
 0 11 -1 0.77 0.36
 0 11 1 0.17 0.35
 11 0 -1 0.22 0.38
 11 0 -1 2 0.44
 11 0 1 0.34 0.35
 -11 0 -3 7.2 0.86
 -11 0 3 5.68 0.62
 0 -11 -3 7.65 0.66
 0 -11 3 6.89 0.61
 0 -11 3 10.55 0.81
 0 11 -3 5.03 0.37
 11 0 -3 9.16 0.69
 11 0 -3 6.4 0.57
 11 0 3 8.94 0.48
 -11 0 -5 3.05 0.74
 -11 0 5 2.55 0.45
 -11 0 5 1.8 0.35
 0 -11 -5 2.97 0.48
 0 -11 5 2.91 0.48
 0 -11 5 2.6 0.56
 0 11 -5 2 0.53
 0 11 5 3.24 0.48
 11 0 -5 1.59 0.39
 11 0 5 2.93 0.33
 -11 0 -7 5.94 0.89
 -11 0 7 5.56 0.57
 0 -11 -7 4.95 0.55
 0 -11 7 6.2 0.72
 0 11 -7 4.37 0.59
 0 11 7 5.15 0.53
 11 0 -7 4.73 0.51
 -11 0 -9 27.85 1.42
 -11 0 9 31.42 1.11
 0 -11 -9 23.37 0.82
 0 -11 9 28.9 1.11
 0 11 -9 23.06 0.98
 0 11 9 24.08 0.81
 11 0 -9 30.9 0.99
 11 0 -9 24.12 0.63
 -11 -1 0 1.46 0.39
 -1 11 0 0.63 0.33
 1 -11 0 0.56 0.35
 1 -11 0 0.65 0.47
 11 1 0 1.29 0.44
 11 1 0 1.32 0.41
 -11 -1 2 94.55 1.69
 -1 11 -2 64.43 1.05
 -1 11 2 85.83 1.72
 1 -11 -2 117.33 1.93
 1 -11 2 100.68 1.72
 1 -11 2 132.21 2.23
 11 1 -2 87.4 1.72
 11 1 -2 122.43 1.78
 11 1 2 122.67 1.54
 -11 -1 -4 41.31 1.51
 -11 -1 4 32.33 1.08
 -1 11 -4 37.15 1.31
 1 -11 -4 38.44 1.18
 1 -11 4 36.24 1.12
 1 -11 4 49.15 1.43
 11 1 -4 31.81 1.07
 11 1 -4 41.78 1.07
 11 1 4 44.91 0.82
 -11 -1 -6 80.16 2.25
 -11 -1 6 64.27 1.45
 -11 -1 6 64.17 1.25
 -1 11 -6 71.19 1.66
 -1 11 6 77.22 1.42
 1 -11 -6 67.54 1.44
 1 -11 6 98.13 1.91
 11 1 -6 73.34 1.5
 11 1 6 103.57 0.97
 -11 -1 -8 60.56 1.96
 -11 -1 8 67.73 1.51
 -1 11 -8 58.39 1.49
 -1 11 8 51.69 1.12
 1 -11 -8 52.45 1.21
 1 -11 8 66.45 1.56
 11 1 -8 59.25 1.32
 11 1 -8 54.98 1
 -11 -2 -1 282.28 2.27
 -11 -2 1 298.43 2.9
 -2 11 -1 153.33 1.66
 -2 11 1 168.05 2.11
 2 -11 -1 291.92 3.05
 2 -11 -1 364.97 3.54
 2 -11 1 262.25 2.74
 2 -11 1 330.26 3.42
 11 2 -1 264.46 3.17
 11 2 -1 329.18 2.96
 11 2 1 245.3 3.25
 11 2 1 307.64 2.56
 -11 -2 3 215.09 2.55
 -2 11 -3 302.58 3.6
 -2 11 3 197.24 2.6
 2 -11 -3 313.79 3.21
 2 -11 3 260.69 2.69
 2 -11 3 303.26 3.32
 11 2 -3 271.14 2.97
 11 2 -3 309.18 2.73
 11 2 3 311.43 2.27
 -11 -2 5 73.47 1.55
 -2 11 -5 85.26 1.85
 2 -11 -5 79.58 1.6
 2 -11 5 101.38 1.89
 11 2 -5 80.67 1.58
 11 2 5 134.61 1.37
 -11 -2 7 119.54 1.93
 -2 11 -7 137.51 2.27
 -2 11 7 139.69 1.8
 2 -11 -7 123.46 1.89
 2 -11 7 177.35 2.42
 11 2 -7 156.34 2.12
 11 2 -7 134.64 1.68
 11 2 7 197.48 1.31
 -11 -2 9 24.41 0.94
 -2 11 -9 28.26 1.13
 -2 11 9 25.89 0.82
 2 -11 -9 25.22 0.88
 2 -11 9 29.75 1.05
 11 2 -9 25.44 0.59
 -11 -3 0 1.21 0.36
 -3 11 0 0.6 0.27
 3 -11 0 0.36 0.38
 3 -11 0 0.89 0.45
 11 3 0 0.76 0.53
 11 3 0 1.53 0.38
 -11 -3 -2 532.83 2.75
 -11 -3 2 450.56 3.63
 -3 11 2 280.88 2.62
 3 -11 -2 544.18 4.29
 3 -11 -2 607.12 4.46
 3 -11 2 493.15 3.67
 3 -11 2 545.41 4.43
 11 3 -2 483.88 4.38
 11 3 -2 599.86 3.93
 11 3 2 518.7 3.12
 -11 -3 4 0.87 0.36
 -3 11 -4 1.69 0.55
 -3 11 4 0.73 0.34
 3 -11 -4 1.12 0.41
 3 -11 4 2.51 0.57
 11 3 -4 1.08 0.39
 11 3 4 0.88 0.31
 -11 -3 6 307.03 3.07
 -3 11 -6 353.88 3.72
 3 -11 -6 291.87 2.97
 3 -11 6 420.33 3.61
 11 3 -6 341.14 2.75
 11 3 6 551.26 2.67
 -11 -3 8 0.48 0.34
 -3 11 -8 0.54 0.45
 3 -11 -8 1.37 0.39
 3 -11 8 0.83 0.39
 11 3 -8 0.73 0.21
 11 3 8 1.31 0.25
 -11 -4 -1 635.15 3.45
 -11 -4 1 695.83 4.48
 -4 11 -1 739.16 3.12
 -4 11 1 412.69 2.86
 4 -11 -1 697.05 4.95
 4 -11 -1 604.32 4.52
 4 -11 1 606.55 4.2
 4 -11 1 659.57 4.79
 11 4 -1 584.59 3.75
 11 4 1 589.49 3.47
 -11 -4 3 461.96 3.72
 -4 11 -3 608.74 5.37
 -4 11 3 310.21 2.73
 4 -11 -3 543.91 4.29
 4 -11 3 639.81 4.81
 11 4 -3 626.62 3.91
 11 4 3 671.89 3.51
 -11 -4 5 515.08 4.04
 -4 11 -5 624.41 5.13
 4 -11 -5 499.85 4.02
 4 -11 5 680.63 4.62
 11 4 -5 527.17 3.45
 11 4 5 868.7 3.79
 -11 -4 7 224.81 2.62
 -4 11 -7 248.19 3.21
 4 -11 -7 243.69 2.71
 4 -11 7 254.23 2.59
 11 4 -7 253.88 2.11
 11 4 7 370.85 2.25
 -11 -4 9 303.82 3.01
 -4 11 -9 314.34 3.61
 4 -11 -9 310.27 2.95
 4 -11 9 339.13 2.83
 11 4 -9 340.18 1.93
 11 4 9 429.12 2.28
 -11 -5 0 0.42 0.3
 -5 11 0 0.91 0.32
 5 -11 0 0.93 0.41
 5 -11 0 0.63 0.43
 11 5 0 0.43 0.31
 -11 -5 -2 67.74 1.1
 -11 -5 2 75.26 1.54
 -5 11 -2 75.11 2.06
 -5 11 2 59.89 1.16
 5 -11 -2 87.14 1.84
 5 -11 -2 80.19 1.73
 5 -11 2 74.86 1.49
 5 -11 2 74.6 1.69
 11 5 -2 90.02 1.55
 11 5 2 78.45 1.3
 -11 -5 4 36.37 1.11
 -5 11 -4 39.42 1.48
 -5 11 4 31.93 0.95
 5 -11 -4 39.96 1.23
 5 -11 4 42.24 1.24
 11 5 4 57.85 1.11
 -11 -5 6 66.58 1.51
 -5 11 -6 79 1.92
 5 -11 -6 71.6 1.56
 5 -11 6 78.39 1.48
 11 5 -6 71.34 1.17
 11 5 6 132.13 1.53
 -11 -5 8 55.76 1.33
 -5 11 -8 62.52 1.71
 5 -11 -8 59.06 1.39
 5 -11 8 66.55 1.29
 11 5 -8 68 0.98
 11 5 8 100.32 1.26
 -11 -6 -1 40.92 0.96
 -11 -6 1 43.82 1.16
 -6 11 -1 49.35 1.89
 -6 11 1 40.63 0.88
 6 -11 -1 47.12 1.4
 6 -11 -1 38.77 1.29
 6 -11 1 46.48 1.29
 6 -11 1 36.61 1.25
 11 6 -1 43.92 1.08
 11 6 1 42.43 1.02
 -11 -6 3 64.46 1.46
 -6 11 -3 69.79 1.99
 -6 11 3 59.58 1.12
 6 -11 -3 68.65 1.65
 6 -11 3 60.6 1.45
 11 6 3 93.81 1.42
 -11 -6 5 18.8 0.87
 -6 11 -5 21.5 1.14
 -6 11 5 22.24 0.84
 6 -11 -5 19.83 0.93
 6 -11 5 19.63 0.83
 11 6 -5 19.51 0.66
 11 6 5 35.12 0.9
 -11 -6 7 32.77 1.1
 -6 11 -7 35.81 1.4
 6 -11 -7 30.65 1.07
 6 -11 7 31.03 0.92
 11 6 -7 36.83 0.8
 11 6 7 55.49 1.06
 -11 -7 0 1.73 0.37
 -7 11 0 1.56 0.9
 7 -11 0 0.44 0.42
 7 -11 0 0.61 0.46
 11 7 0 0.66 0.32
 -11 -7 -2 402.17 2.77
 -11 -7 2 391.88 3.34
 -7 11 -2 445.24 3.27
 -7 11 -2 567.19 5.88
 -7 11 2 434.33 2.66
 7 -11 -2 458.1 4.17
 7 -11 -2 535.74 4.47
 7 -11 2 375.27 3.48
 11 7 2 517.04 3.35
 -11 -7 4 1.03 0.38
 -7 11 -4 2.75 0.74
 -7 11 4 0.8 0.28
 7 -11 -4 1.2 0.45
 7 -11 4 0.86 0.36
 11 7 4 1.06 0.36
 -11 -7 6 354.83 3.38
 -7 11 -6 379.64 4.45
 -7 11 6 485 3.33
 7 -11 -6 405.18 3.72
 7 -11 6 349.17 2.88
 11 7 -6 418.88 2.69
 11 7 6 645.16 3.58
 -11 -8 -1 2.43 0.39
 -11 -8 1 1.94 0.43
 -8 11 -1 2.45 0.44
 -8 11 -1 5.88 1.03
 -8 11 1 1.43 0.4
 -8 11 1 5.11 0.75
 8 -11 -1 2.35 0.53
 8 -11 -1 1.43 0.55
 8 -11 1 4.2 0.6
 11 8 -1 2.5 0.41
 11 8 1 3.01 0.44
 -11 -8 -3 11.09 0.55
 -11 -8 3 9.34 0.62
 -8 11 -3 12.77 1.14
 -8 11 3 9.45 0.49
 8 -11 -3 11.09 0.82
 8 -11 3 8.75 0.65
 11 8 3 14.95 0.69
 -11 -8 5 8.1 0.61
 -8 11 -5 10.89 1.12
 -8 11 5 8.42 0.66
 -8 11 5 10.18 0.55
 8 -11 -5 8.04 0.68
 8 -11 5 6.61 0.58
 11 8 -5 8.63 0.49
 11 8 5 13.25 0.66
 -11 -8 7 13.13 0.76
 -8 11 -7 15.36 1.12
 -8 11 7 15.57 0.82
 8 -11 -7 13.77 0.83
 8 -11 7 14.08 0.66
 11 8 -7 18.2 0.59
 11 8 7 24.44 0.82
 -11 -9 0 0.41 0.34
 -9 11 0 0.86 0.35
 -9 11 0 0.37 0.54
 9 -11 0 1.04 0.42
 9 -11 0 0.06 0.42
 11 9 0 0.65 0.35
 -11 -9 -2 143.03 1.78
 -11 -9 2 157.95 2.16
 -9 11 -2 191.71 3.46
 -9 11 2 142.78 2.08
 -9 11 2 199.16 1.75
 9 -11 -2 149.82 2.47
 9 -11 -2 163.24 2.4
 9 -11 2 107.78 1.89
 11 9 2 194.16 2.15
 -11 -9 4 6.34 0.59
 -9 11 -4 6.23 0.96
 -9 11 4 6.04 0.62
 -9 11 4 6.48 0.45
 9 -11 -4 5.56 0.67
 9 -11 4 3.67 0.5
 11 9 4 9.87 0.61
 -11 -9 6 122.95 1.93
 -9 11 -6 144.18 3.09
 -9 11 6 139.44 2.16
 -9 11 6 154.95 1.73
 9 -11 -6 137.79 2.3
 9 -11 6 123.5 1.76
 11 9 -6 168.65 1.69
 11 9 6 218.54 2.23
 -11 -10 -1 1.05 0.36
 -11 -10 1 0.89 0.37
 -10 11 -1 1.21 0.6
 -10 11 1 1.1 0.38
 10 -11 -1 1.42 0.46
 10 -11 -1 1.55 0.45
 10 -11 1 0.31 0.41
 11 10 1 1.53 0.42
 -11 -10 -3 0.38 0.3
 -11 -10 3 0.36 0.36
 -10 11 -3 -0.13 0.57
 -10 11 3 0.46 0.36
 -10 11 3 0.56 0.27
 10 -11 -3 0.55 0.45
 10 -11 3 0.71 0.38
 11 10 3 0.84 0.37
 -11 -11 0 0.84 0.37
 11 -11 0 0.46 0.38
 -11 -11 -2 74.23 1.37
 -11 -11 2 68.9 1.47
 -11 11 -2 88.66 2.17
 -11 11 2 73.13 1.42
 11 -11 -2 74.43 1.82
 11 -11 -2 79.27 1.66
 11 -11 2 57.51 1.38
 11 11 2 104.07 1.66
 -10 -12 0 3.81 0.52
 12 -10 0 3.33 0.51
 -12 10 2 13.15 0.7
 -10 -12 -2 11.55 0.64
 -10 -12 2 11.01 0.73
 12 -10 -2 12.75 0.96
 12 -10 -2 11.92 0.76
 12 -10 2 9.16 0.66
 -12 9 1 5.32 0.62
 -9 -12 -1 4.3 0.51
 -9 -12 1 4.76 0.54
 12 -9 -1 2.59 0.47
 12 -9 1 2.58 0.47
 -12 9 3 11.59 0.7
 -9 -12 -3 11.01 0.64
 -9 -12 3 10.85 0.71
 9 12 -3 14.29 0.68
 9 12 3 17.03 0.77
 12 -9 -3 13.44 0.94
 12 -9 3 8.25 0.61
 -8 -12 0 227.76 2.57
 12 -8 0 164.14 2.17
 -12 8 2 6.48 0.6
 -8 -12 -2 4.63 0.49
 -8 -12 2 5.24 0.58
 12 -8 -2 6.86 0.86
 12 -8 -2 4.53 0.55
 12 -8 2 3.7 0.48
 -12 8 -4 270.21 3.92
 -12 8 4 246.24 2.64
 -12 8 4 278.45 2.05
 -8 -12 -4 249.08 2.51
 -8 -12 4 240.65 2.67
 8 12 -4 324.11 2.64
 8 12 4 400.9 3.15
 12 -8 -4 310.35 3.72
 12 -8 4 215.15 2.3
 -12 7 1 96.68 1.82
 -7 -12 -1 84.36 1.57
 -7 -12 1 90.87 1.68
 12 -7 -1 107.44 2.25
 12 -7 -1 72.75 1.51
 12 -7 1 76.09 1.51
 -12 7 3 67.25 1.5
 -7 -12 -3 55.29 1.27
 -7 -12 3 49.34 1.27
 7 12 -3 72 1.35
 7 12 3 83.98 1.47
 12 -7 -3 66.95 1.82
 12 -7 -3 61.3 1.43
 12 -7 3 63.14 1.37
 -12 7 -5 58.32 2.02
 -12 7 5 53.98 1.29
 -12 7 5 52.3 0.97
 -7 -12 -5 55.35 1.27
 -7 -12 5 48.29 1.24
 7 12 -5 52.87 1
 7 12 5 84.53 1.52
 12 -7 -5 61.63 1.73
 12 -7 5 55.87 1.14
 -12 6 0 619.51 4.5
 -6 -12 0 486.62 3.77
 12 -6 0 428.48 3.6
 -12 6 2 12.34 0.77
 -6 -12 -2 10.63 0.68
 -6 -12 2 8.42 0.64
 6 12 -2 10.1 0.64
 12 -6 -2 10.84 0.88
 12 -6 -2 8.45 0.67
 12 -6 2 9.85 0.67
 -12 6 -4 496.35 5.19
 -12 6 4 626.97 4.38
 -12 6 4 508.23 3.02
 -6 -12 -4 512.34 3.78
 -6 -12 4 541.72 4.05
 6 12 -4 537.77 3.47
 6 12 4 816.19 4.47
 12 -6 -4 600.64 5.23
 12 -6 4 591.79 3.56
 -12 6 -6 0.77 0.67
 -12 6 6 0.61 0.38
 -12 6 6 0.7 0.27
 -6 -12 -6 1.11 0.42
 -6 -12 6 0.9 0.38
 6 12 -6 1.41 0.21
 6 12 6 0.72 0.4
 12 -6 -6 1.15 0.51
 12 -6 6 0.66 0.33
 -12 5 1 2.7 0.55
 -5 -12 -1 2.37 0.46
 -5 -12 1 2.26 0.44
 5 12 -1 2.57 0.46
 12 -5 -1 2.87 0.63
 12 -5 -1 2.91 0.55
 12 -5 1 2.02 0.47
 -12 5 3 4.11 0.57
 -5 -12 -3 3.81 0.53
 -5 -12 3 2.08 0.42
 5 12 -3 3.15 0.43
 5 12 3 4.94 0.56
 12 -5 -3 4.75 0.7
 12 -5 -3 3.27 0.52
 12 -5 3 3.86 0.48
 -12 5 -5 23.17 1.38
 -12 5 5 23.6 0.96
 -12 5 5 20.87 0.72
 -5 -12 -5 21.67 0.91
 -5 -12 5 17.98 0.81
 -5 -12 5 26.5 1.11
 5 12 -5 21.24 0.62
 5 12 5 30.98 1.01
 12 -5 -5 24.24 1.18
 12 -5 5 28.99 0.82
 -12 5 -7 20.17 1.4
 -12 5 7 21.51 0.9
 -12 5 7 20.07 0.72
 -5 -12 -7 18.3 0.8
 -5 -12 7 16.05 0.78
 -5 -12 7 23.84 1.05
 5 12 7 22.38 0.86
 12 -5 -7 18.59 0.97
 -12 4 0 479.09 3.59
 -4 -12 0 409.27 3.56
 4 12 0 436.02 3.96
 12 -4 0 414.88 3.48
 -12 4 2 1.65 0.48
 -4 -12 -2 0.86 0.39
 -4 -12 2 0.45 0.36
 4 12 -2 0.57 0.32
 12 -4 -2 0.92 0.51
 12 -4 -2 1.12 0.45
 12 -4 2 1.44 0.4
 -12 4 -4 288.67 3.83
 -12 4 4 367.4 3.5
 -12 4 4 258.93 2.26
 -4 -12 -4 321.82 3.13
 -4 -12 4 251.98 2.76
 -4 -12 4 340.28 3.39
 4 12 -4 304.85 2.45
 4 12 4 429.64 3.31
 12 -4 -4 307.43 3.6
 12 -4 -4 251.23 2.56
 12 -4 4 388.54 2.71
 -12 4 -6 6.37 0.94
 -12 4 6 4.5 0.58
 -12 4 6 3.97 0.42
 -4 -12 -6 4.35 0.55
 -4 -12 6 3.65 0.5
 -4 -12 6 4.18 0.63
 4 12 6 6.21 0.59
 12 -4 -6 4.42 0.62
 12 -4 6 4.61 0.39
 -12 4 -8 208.78 3.73
 -12 4 8 212.25 2.55
 -4 -12 8 226.18 2.8
 4 12 8 222.48 2.44
 12 -4 -8 196.81 2.6
 -12 3 1 425.7 3.65
 -3 -12 -1 476.65 3.98
 -3 -12 1 443.8 3.67
 3 12 -1 334.83 3.25
 3 12 1 420.43 4.14
 12 -3 -1 484.9 4.6
 12 -3 -1 429.03 3.56
 12 -3 1 526.58 3.58
 -12 3 3 498.77 4.19
 -3 -12 -3 651.01 4.5
 -3 -12 3 500.07 3.85
 -3 -12 3 492.26 4.09
 3 12 -3 551.38 3.54
 12 -3 -3 554.66 4.7
 12 -3 -3 473.09 3.66
 12 -3 3 712.3 3.81
 -12 3 -5 287.7 3.89
 -12 3 5 364.98 3.51
 -12 3 5 258.83 2.28
 -3 -12 -5 346.14 3.26
 -3 -12 5 275.96 2.9
 -3 -12 5 298.82 3.33
 3 12 -5 345.55 3.44
 3 12 5 460.51 3.48
 12 -3 -5 301.56 3.35
 12 -3 5 383.39 2.35
 -12 3 -7 436.08 5.06
 -12 3 7 526.06 4.13
 -12 3 7 472.6 3.07
 -3 -12 -7 374.95 3.15
 -3 -12 7 412.92 3.91
 3 12 -7 427.28 3.61
 3 12 7 497.45 3.61
 12 -3 -7 415.54 3.75
 -12 2 0 115.66 1.76
 -2 -12 0 98.69 1.88
 2 12 0 86.51 1.81
 12 -2 0 121.39 1.81
 -12 2 2 3.69 0.58
 -2 -12 -2 4.65 0.59
 -2 -12 2 3.25 0.48
 -2 -12 2 3.52 0.57
 2 12 -2 3.86 0.48
 12 -2 -2 3.98 0.58
 12 -2 -2 4.63 0.58
 12 -2 2 4.92 0.53
 -12 2 -4 88.63 2.15
 -12 2 4 74.87 1.64
 -12 2 4 63.24 1.22
 -2 -12 -4 80.18 1.63
 -2 -12 4 71.59 1.51
 -2 -12 4 81.1 1.84
 2 12 -4 79.73 1.75
 2 12 -4 69.72 0.95
 2 12 4 121.04 1.83
 12 -2 -4 69.76 1.66
 12 -2 -4 72.8 1.4
 12 -2 4 97.38 1.32
 -12 2 -6 12.35 1.04
 -12 2 6 15.9 0.84
 -12 2 6 14.52 0.68
 -2 -12 -6 13.61 0.75
 -2 -12 6 12.15 0.74
 -2 -12 6 13.13 0.93
 2 12 -6 13.39 0.82
 2 12 6 17.71 0.79
 12 -2 -6 12.19 0.8
 12 -2 6 12.99 0.42
 -12 2 -8 41.42 1.66
 -12 2 8 48.36 1.35
 -2 -12 -8 32.79 0.97
 -2 -12 8 36.61 1.29
 2 12 -8 35.8 1.15
 2 12 8 42.82 1.09
 12 -2 -8 34.11 1.08
 -12 1 -1 64.33 1.2
 -12 1 1 53.45 1.27
 -1 -12 -1 56.03 1.44
 -1 -12 1 53.14 1.38
 -1 -12 1 45.66 1.31
 1 12 -1 44.24 1.24
 1 12 1 41.68 1.3
 12 -1 -1 38.14 1.22
 12 -1 -1 65.23 1.4
 12 -1 1 65.72 1.35
 -12 1 3 138.02 2.16
 -1 -12 -3 181.5 2.43
 -1 -12 3 172.54 2.35
 -1 -12 3 186.53 2.64
 1 12 -3 163.89 1.67
 12 -1 -3 151.68 2.33
 12 -1 -3 173.58 2.21
 12 -1 3 206.79 2
 -12 1 -5 86.29 2.18
 -12 1 5 74.72 1.6
 -12 1 5 63.18 1.19
 -1 -12 -5 89.79 1.72
 -1 -12 5 75.25 1.57
 -1 -12 5 87.63 1.86
 1 12 -5 89.39 1.87
 1 12 5 119.31 1.84
 12 -1 -5 76.79 1.65
 12 -1 5 78.64 1
 -12 1 -7 42.68 1.66
 -12 1 7 43.05 1.26
 -12 1 7 47.05 1.09
 -1 -12 -7 34.59 1.05
 -1 -12 7 46.27 1.48
 1 12 -7 41.31 1.27
 1 12 7 47.92 1.17
 12 -1 -7 38.87 1.17
 -12 0 0 5.04 0.57
 0 -12 0 2.76 0.47
 0 -12 0 2.96 0.56
 0 12 0 2.69 0.47
 12 0 0 2.07 0.5
 12 0 0 4.39 0.56
 -12 0 2 15.02 0.78
 0 -12 -2 16.32 0.87
 0 -12 2 14.72 0.8
 0 -12 2 17.92 0.99
 0 12 -2 12.26 0.59
 0 12 2 13.31 0.81
 12 0 -2 12.48 0.78
 12 0 -2 17.99 0.81
 12 0 2 17.68 0.72
 -12 0 4 74.18 1.57
 0 -12 -4 100.66 1.85
 0 -12 4 90.6 1.79
 0 -12 4 98.85 1.99
 0 12 -4 94.35 1.97
 12 0 -4 74.54 1.61
 12 0 -4 98.78 1.66
 12 0 4 96.95 1.23
 -12 0 -6 5.34 0.83
 -12 0 6 5.34 0.59
 -12 0 6 6.18 0.53
 0 -12 -6 5.45 0.59
 0 -12 6 6.42 0.75
 0 12 -6 4.85 0.64
 12 0 -6 5.39 0.55
 12 0 6 8.37 0.41
 -12 0 -8 71.55 2.11
 -12 0 8 79.67 1.65
 0 -12 -8 63.77 1.34
 0 -12 8 80.26 1.81
 0 12 -8 67.05 1.57
 0 12 8 72.99 1.35
 12 0 -8 78.1 1.54
 12 0 -8 53.48 1.04
 -12 -1 -1 56.7 1.06
 -12 -1 1 55.59 1.3
 -1 12 -1 32.04 0.89
 -1 12 1 39.49 1.19
 1 -12 -1 55.23 1.42
 1 -12 1 45.65 1.24
 1 -12 1 61.1 1.62
 12 1 -1 47.1 1.38
 12 1 -1 61.53 1.37
 12 1 1 54.11 1.22
 -12 -1 3 64.52 1.47
 -1 12 3 65.73 1.58
 1 -12 -3 90.09 1.8
 1 -12 3 72.04 1.56
 1 -12 3 86.9 1.94
 12 1 -3 65.46 1.5
 12 1 -3 83.9 1.52
 12 1 3 83.3 1.24
 -12 -1 5 4.85 0.55
 -1 12 -5 5.21 0.66
 1 -12 -5 5.11 0.57
 1 -12 5 5.43 0.69
 12 1 -5 4.73 0.53
 12 1 5 5.51 0.4
 -12 -1 7 112.19 1.9
 -1 12 -7 127.24 2.19
 1 -12 -7 111.03 1.83
 1 -12 7 162.26 2.46
 12 1 -7 134.51 1.99
 12 1 7 197.15 1.38
 -12 -2 0 899.08 4.77
 -2 12 0 328.03 2.64
 2 -12 0 754.85 4.9
 2 -12 0 1004.38 6.11
 12 2 0 730.42 5.36
 12 2 0 882.31 4.8
 -12 -2 2 15.5 0.78
 -2 12 -2 16.38 0.52
 -2 12 2 11.06 0.71
 2 -12 -2 19.93 0.94
 2 -12 2 14.27 0.77
 2 -12 2 17.58 1
 12 2 -2 17.66 0.9
 12 2 -2 19.77 0.84
 12 2 2 18.55 0.72
 -12 -2 4 533.88 4.14
 -2 12 -4 701.94 5.5
 2 -12 -4 682.25 4.79
 2 -12 4 821.58 5.6
 12 2 -4 617.55 4.43
 12 2 4 657.25 3.26
 -12 -2 6 14.63 0.77
 -2 12 -6 16.75 0.97
 2 -12 -6 13.47 0.75
 2 -12 6 21.71 1.06
 12 2 -6 15.16 0.76
 12 2 6 24 0.64
 -12 -2 8 459.45 3.74
 -2 12 -8 500.61 4.34
 2 -12 -8 469.18 3.63
 2 -12 8 592 4.48
 12 2 -8 453.75 2.78
 -12 -3 -1 6.46 0.46
 -12 -3 1 7.47 0.63
 -3 12 -1 5.78 0.44
 -3 12 1 2.77 0.38
 3 -12 -1 6.6 0.66
 3 -12 -1 7.37 0.75
 3 -12 1 4.97 0.6
 3 -12 1 7.89 0.78
 12 3 -1 6.04 0.73
 12 3 -1 7.7 0.65
 12 3 1 5.8 0.52
 -12 -3 3 12.48 0.74
 -3 12 -3 16.28 1.06
 -3 12 3 11.39 0.68
 3 -12 -3 18.08 0.92
 3 -12 3 13.29 0.72
 3 -12 3 19.72 1.04
 12 3 -3 16.27 0.9
 12 3 -3 18.04 0.8
 12 3 3 17.13 0.67
 -12 -3 5 12.72 0.75
 -3 12 -5 15.09 0.92
 3 -12 -5 12.67 0.78
 3 -12 5 17.15 0.94
 12 3 5 20.48 0.67
 -12 -3 7 28.32 0.98
 -3 12 -7 31.18 1.23
 3 -12 -7 27.43 1
 3 -12 7 35.22 1.16
 12 3 -7 32.31 0.85
 12 3 7 52.34 0.88
 -12 -4 0 23.94 0.82
 -4 12 0 20.25 0.66
 4 -12 0 26.06 1.06
 4 -12 0 22.14 1.04
 12 4 0 25.66 0.85
 -12 -4 2 0.7 0.35
 -4 12 -2 0.18 0.52
 -4 12 2 0.44 0.27
 4 -12 -2 0.63 0.42
 4 -12 2 0.64 0.36
 4 -12 2 1.27 0.51
 12 4 -2 1.07 0.41
 12 4 2 0.18 0.32
 -12 -4 4 4.4 0.55
 -4 12 -4 4.39 0.71
 -4 12 4 2.77 0.42
 4 -12 -4 5.15 0.6
 4 -12 4 5.66 0.71
 12 4 4 5.68 0.49
 -12 -4 6 88.86 1.7
 -4 12 -6 95.71 2.08
 4 -12 -6 82.09 1.68
 4 -12 6 98.99 1.8
 12 4 -6 83.19 1.35
 12 4 6 156.78 1.61
 -12 -4 8 5.82 0.52
 -4 12 -8 6.93 0.77
 4 -12 -8 5.31 0.56
 4 -12 8 7.75 0.61
 12 4 -8 7.46 0.41
 12 4 8 12.02 0.53
 -12 -5 -1 422.61 2.88
 -12 -5 1 441.96 3.49
 -5 12 1 298.44 2.25
 5 -12 -1 449.8 4.14
 5 -12 -1 378.84 3.74
 5 -12 1 398.67 3.61
 5 -12 1 417.06 3.98
 12 5 -1 407.02 3.21
 12 5 1 389.5 2.97
 -12 -5 3 264.13 2.89
 -5 12 -3 311.34 4.01
 -5 12 3 219.42 2.23
 5 -12 -3 284.81 3.28
 5 -12 3 307.41 3.41
 12 5 3 367.16 2.79
 -12 -5 5 252.56 2.87
 -5 12 -5 287.95 3.68
 -5 12 5 234.04 2.48
 5 -12 -5 241.98 2.91
 5 -12 5 290.17 3.07
 12 5 5 420.14 2.84
 -12 -5 7 115.85 1.92
 -5 12 -7 143.77 2.58
 5 -12 -7 124.43 2.04
 5 -12 7 128.3 1.91
 12 5 -7 151.67 1.64
 12 5 7 217.1 1.93
 -12 -6 0 145.05 1.87
 6 -12 0 137.44 2.26
 6 -12 0 135.37 2.31
 12 6 0 116.61 1.7
 -12 -6 -2 0.78 0.29
 -12 -6 2 0.75 0.36
 -6 12 -2 0.51 0.63
 -6 12 2 0.36 0.23
 6 -12 -2 0.67 0.46
 6 -12 -2 1.77 0.54
 6 -12 2 1.41 0.48
 12 6 -2 2 0.41
 12 6 2 1.09 0.37
 -12 -6 4 136.01 2.12
 -6 12 -4 166.27 2.95
 -6 12 4 141.72 1.77
 6 -12 -4 165.08 2.51
 6 -12 4 146.47 2.21
 12 6 4 225.9 2.22
 -12 -6 6 1.51 0.42
 -6 12 -6 1.56 0.56
 6 -12 -6 1.8 0.48
 6 -12 6 1.9 0.42
 12 6 -6 1.9 0.3
 12 6 6 3.04 0.43
 -12 -7 -1 322.67 2.64
 -12 -7 1 356.33 3.12
 -7 12 -1 510.77 5.89
 -7 12 1 392.42 2.4
 7 -12 -1 342.35 3.59
 7 -12 -1 383.55 3.89
 7 -12 1 291.24 3.3
 12 7 -1 347.49 2.95
 12 7 1 374.27 2.97
 -12 -7 3 385.22 3.35
 -7 12 -3 471.08 5.22
 -7 12 3 348.66 2.43
 7 -12 -3 391.92 3.94
 7 -12 3 303.1 3.14
 12 7 3 564.55 3.59
 -12 -7 5 282.52 3
 -7 12 -5 339.46 4.27
 -7 12 5 331.68 2.63
 7 -12 -5 293.56 3.28
 7 -12 5 264.86 2.75
 12 7 5 498.09 3.25
 -12 -8 0 42.84 1.1
 -8 12 0 32.3 1
 -8 12 0 60.28 1.98
 8 -12 0 38.65 1.26
 8 -12 0 41.4 1.38
 12 8 0 38.24 1.04
 -12 -8 -2 10.37 0.56
 -12 -8 2 9.55 0.64
 -8 12 -2 13.7 1.32
 -8 12 2 8.66 0.65
 -8 12 2 10.66 0.51
 8 -12 -2 10.49 0.84
 8 -12 -2 14.01 0.94
 8 -12 2 6.87 0.71
 12 8 2 14.41 0.72
 -12 -8 4 28.2 0.99
 -8 12 -4 31.63 1.56
 -8 12 4 30.96 0.78
 8 -12 -4 31.45 1.19
 8 -12 4 26.12 0.97
 12 8 4 41.61 1.05
 -12 -9 -1 58.05 1.21
 -12 -9 1 67.51 1.42
 -9 12 -1 89.28 2.32
 -9 12 1 61.81 1.37
 -9 12 1 83.87 1.88
 9 -12 -1 63.6 1.64
 9 -12 -1 74.02 1.77
 9 -12 1 55.69 1.49
 12 9 1 80.92 1.46
 -12 -9 3 37.65 1.1
 -9 12 -3 49.7 1.97
 -9 12 3 41.23 1.21
 -9 12 3 41.87 0.83
 9 -12 -3 42.1 1.41
 9 -12 3 28.63 1.04
 12 9 3 55.15 1.23
 -12 -10 0 575.48 3.86
 10 -12 0 515.86 4.26
 -12 -10 -2 3.62 0.45
 -12 -10 2 2.91 0.48
 -10 12 -2 4.48 0.77
 -10 12 2 2.78 0.45
 10 -12 -2 2.64 0.56
 10 -12 2 1.27 0.45
 12 10 2 2.47 0.46
 -9 -13 0 1.01 0.37
 13 -9 0 0.96 0.4
 -8 -13 -1 368.1 3.25
 -8 -13 1 380.43 3.44
 13 -8 -1 307.66 3.03
 13 -8 1 293.86 2.87
 -13 8 3 362.62 3.25
 -8 -13 -3 307.4 2.88
 -8 -13 3 283.46 2.98
 8 13 -3 395.51 3.05
 13 -8 -3 429.03 4.58
 13 -8 3 284.35 2.73
 -7 -13 0 0.7 0.37
 13 -7 0 0.65 0.35
 -13 7 2 38.84 1.23
 -7 -13 -2 31.4 1.02
 -7 -13 2 33.11 1.08
 7 13 -2 39.83 1.06
 13 -7 -2 43.77 1.55
 13 -7 -2 31.61 1.08
 13 -7 2 32.32 1.03
 -13 7 4 21.25 0.89
 -13 7 4 18.72 0.62
 -7 -13 -4 16.65 0.78
 -7 -13 4 17.42 0.84
 7 13 -4 20.2 0.72
 13 -7 -4 22.41 1.23
 13 -7 4 19.29 0.83
 -13 6 1 32.5 1.17
 -6 -13 -1 29.53 1
 -6 -13 1 28.95 1.02
 6 13 -1 36.76 1.09
 13 -6 -1 30.42 1.07
 13 -6 1 36.02 1.17
 -13 6 3 1.59 0.49
 -6 -13 -3 1.01 0.39
 -6 -13 3 0.96 0.37
 6 13 -3 1.32 0.35
 13 -6 -3 2.24 0.63
 13 -6 -3 0.67 0.42
 13 -6 3 1.58 0.41
 -13 6 5 83.91 1.63
 -13 6 5 66.69 1.07
 -6 -13 -5 78.05 1.57
 -6 -13 5 59.82 1.38
 6 13 -5 66.62 1.03
 6 13 5 109.73 1.75
 13 -6 -5 85.54 2.06
 13 -6 5 87.94 1.42
 -5 -13 0 2.09 0.45
 13 -5 0 1.25 0.49
 -13 5 2 457.7 3.95
 -5 -13 -2 469.28 3.79
 -5 -13 2 423.68 3.6
 5 13 -2 489.13 3.7
 13 -5 -2 519.24 4.93
 13 -5 -2 412.63 3.59
 13 -5 2 591.46 4.07
 -13 5 4 25.94 1.05
 -5 -13 -4 20.29 0.9
 -5 -13 4 16.1 0.82
 5 13 -4 19.21 0.72
 13 -5 -4 22.19 1.16
 13 -5 4 26.6 0.89
 -13 5 -6 378.38 4.77
 -13 5 6 410.16 3.53
 -13 5 6 368.01 2.49
 -5 -13 -6 391.33 3.41
 -5 -13 6 342.81 3.2
 5 13 6 546.56 3.87
 13 -5 -6 399.48 3.99
 13 -5 6 493.75 3
 -13 4 1 5.14 0.61
 -4 -13 -1 5.69 0.62
 -4 -13 1 4.37 0.52
 4 13 -1 5.32 0.57
 13 -4 -1 9.41 0.93
 13 -4 -1 6.68 0.7
 13 -4 1 6.06 0.62
 -13 4 3 21.34 0.96
 -4 -13 -3 19.05 0.91
 -4 -13 3 16.78 0.83
 4 13 -3 18.07 0.74
 13 -4 -3 19.46 1.06
 13 -4 -3 17.42 0.83
 13 -4 3 22.97 0.83
 -13 4 5 4.39 0.58
 -13 4 5 3.96 0.45
 -4 -13 -5 2.87 0.52
 -4 -13 5 4.23 0.52
 -4 -13 5 3.03 0.59
 4 13 -5 2.96 0.56
 4 13 -5 2.51 0.25
 4 13 5 5.56 0.62
 13 -4 -5 3 0.58
 13 -4 5 3.78 0.45
 -13 4 -7 0.91 0.7
 -13 4 7 0.98 0.41
 -13 4 7 0.62 0.27
 -4 -13 -7 0.87 0.39
 -4 -13 7 1.29 0.39
 -4 -13 7 2.38 0.6
 4 13 7 1.34 0.45
 13 -4 -7 1.52 0.47
 -13 3 0 2.76 0.46
 -3 -13 0 1.89 0.46
 3 13 0 1.14 0.41
 13 -3 0 0.66 0.39
 -13 3 2 317.83 3.27
 -3 -13 -2 391.81 3.71
 -3 -13 2 324.78 3.18
 3 13 -2 307.92 2.86
 13 -3 -2 360.95 3.83
 13 -3 -2 401.27 3.64
 13 -3 2 454.01 3.31
 -13 3 4 10.31 0.73
 -3 -13 -4 9.78 0.73
 -3 -13 4 7.92 0.62
 -3 -13 4 7.99 0.81
 3 13 -4 8.96 0.46
 13 -3 -4 8.18 0.75
 13 -3 4 10.96 0.62
 -13 3 -6 282.01 3.94
 -13 3 6 356.12 3.51
 -13 3 6 323.73 2.48
 -3 -13 -6 310.66 3.09
 -3 -13 6 300.11 3.1
 -3 -13 6 298.57 3.38
 3 13 -6 322.06 3.32
 3 13 6 453.04 3.55
 13 -3 -6 301.09 3.3
 13 -3 6 377.41 2.39
 -13 2 1 18.39 0.85
 -2 -13 -1 18.77 0.97
 -2 -13 1 17.36 0.89
 2 13 -1 14.92 0.8
 2 13 1 17.85 0.95
 13 -2 -1 16.65 0.94
 13 -2 -1 19.01 0.86
 13 -2 1 22.31 0.88
 -13 2 3 50.04 1.33
 -2 -13 -3 64.96 1.55
 -2 -13 3 58.39 1.42
 -2 -13 3 62.15 1.63
 2 13 -3 57.79 1.09
 13 -2 -3 48.61 1.4
 13 -2 -3 70.16 1.51
 13 -2 3 79.14 1.39
 -13 2 5 17.56 0.87
 -13 2 5 12.91 0.63
 -2 -13 -5 15.78 0.85
 -2 -13 5 14.77 0.78
 -2 -13 5 14.95 0.97
 2 13 -5 16.05 0.94
 13 -2 -5 14.47 0.84
 13 -2 5 20.83 0.69
 -13 2 -7 27.17 1.41
 -13 2 7 30.04 1.11
 -13 2 7 30.83 0.86
 -2 -13 -7 25.9 0.98
 -2 -13 7 26.66 1.2
 2 13 -7 27.42 1.09
 2 13 7 35.51 1.09
 13 -2 -7 25.57 0.99
 -13 1 0 1.72 0.44
 -1 -13 0 0.5 0.41
 1 13 0 0.37 0.35
 13 -1 0 0.58 0.39
 -13 1 2 288.75 3.02
 -1 -13 -2 317.68 3.34
 -1 -13 2 310.61 3.28
 -1 -13 2 336.97 3.51
 1 13 -2 292.32 2.58
 1 13 2 279.8 3.29
 13 -1 -2 263.75 3.11
 13 -1 -2 340.52 3.15
 13 -1 2 343.52 2.92
 -13 1 4 0.43 0.35
 -1 -13 -4 0.28 0.41
 -1 -13 4 0.56 0.4
 -1 -13 4 0.92 0.52
 1 13 -4 0.38 0.48
 13 -1 -4 0.98 0.43
 13 -1 4 0.64 0.32
 -13 1 6 176.19 2.39
 -13 1 6 173.47 1.9
 -1 -13 -6 164.8 2.31
 -1 -13 6 179.14 2.69
 1 13 -6 177.42 2.58
 13 -1 -6 159.27 2.31
 13 -1 6 187.24 1.53
 -13 0 1 597.15 4.1
 0 -13 -1 557.52 4.45
 0 -13 1 543.79 4.31
 0 -13 1 646.33 4.8
 0 13 -1 473.94 3.52
 0 13 1 436.89 3.85
 13 0 -1 496.44 4.21
 13 0 -1 695.85 4.46
 13 0 1 703.38 4.37
 -13 0 3 355.5 3.43
 0 -13 -3 430.5 3.89
 0 -13 3 381.73 3.68
 0 -13 3 473.59 4.3
 0 13 -3 317.78 1.63
 13 0 -3 305.93 3.22
 13 0 -3 374.47 3.23
 13 0 3 383.65 2.79
 -13 0 5 399.79 3.51
 0 -13 -5 547.63 4.28
 0 -13 5 529.05 4.5
 0 13 -5 559.15 4.69
 13 0 -5 438.34 3.78
 13 0 5 518.6 2.76
 -13 0 -7 289.2 4.07
 -13 0 7 300.46 3.08
 -13 0 7 292.88 2.49
 0 -13 -7 240.95 2.72
 0 -13 7 295.79 3.4
 0 13 -7 279.85 3.22
 13 0 -7 291.78 3
 13 0 7 334.48 1.89
 -13 -1 0 0.47 0.36
 -1 13 0 0.25 0.29
 1 -13 0 0.36 0.41
 1 -13 0 0.42 0.48
 13 1 0 0.6 0.42
 -13 -1 2 158.32 2.19
 -1 13 -2 137.49 1.37
 -1 13 2 130.12 2.13
 1 -13 -2 207.49 2.76
 1 -13 2 175.65 2.45
 1 -13 2 220.64 3
 13 1 -2 168.45 2.43
 13 1 -2 215.14 2.47
 13 1 2 203.37 2.16
 -13 -1 4 8.63 0.66
 -1 13 -4 10.87 0.84
 1 -13 -4 11.9 0.77
 1 -13 4 10.28 0.76
 1 -13 4 12.9 0.94
 13 1 -4 9.97 0.72
 13 1 4 11.25 0.56
 -13 -1 6 103.33 1.8
 -1 13 -6 129.61 2.31
 1 -13 -6 113.63 1.96
 1 -13 6 152.87 2.48
 13 1 -6 128.79 2.03
 13 1 6 146.59 1.42
 -13 -2 -1 13.46 0.59
 -13 -2 1 14.95 0.78
 -2 13 -1 9.1 0.48
 -2 13 1 6.98 0.55
 2 -13 -1 14.69 0.89
 2 -13 1 13.83 0.84
 2 -13 1 17.77 1.06
 13 2 -1 12.49 0.88
 13 2 -1 15.73 0.84
 13 2 1 15.81 0.76
 -13 -2 3 4.85 0.56
 -2 13 -3 5.33 0.73
 -2 13 3 4.29 0.53
 2 -13 -3 6.18 0.67
 2 -13 3 4.83 0.61
 2 -13 3 6 0.79
 13 2 -3 4.95 0.58
 13 2 -3 7.17 0.62
 13 2 3 5.81 0.49
 -13 -2 5 7.41 0.58
 -2 13 -5 9.53 0.86
 2 -13 -5 7.71 0.69
 2 -13 5 10 0.91
 13 2 -5 8.54 0.64
 13 2 5 10.28 0.52
 -13 -2 7 4.36 0.53
 -2 13 -7 4.82 0.64
 2 -13 -7 5.01 0.57
 2 -13 7 6.86 0.73
 13 2 -7 4.89 0.56
 13 2 -7 3.79 0.42
 13 2 7 6.8 0.44
 -13 -3 0 2 0.4
 -3 13 0 -0.03 0.25
 3 -13 0 1.25 0.48
 3 -13 0 0.9 0.54
 13 3 0 0.87 0.53
 13 3 0 0.89 0.4
 -13 -3 2 144.11 2.11
 -3 13 2 83.74 1.46
 3 -13 -2 169.01 2.62
 3 -13 2 143.97 2.18
 3 -13 2 179.15 2.77
 13 3 -2 144.21 2.42
 13 3 -2 180.77 2.28
 13 3 2 170.2 1.98
 -13 -3 4 7.51 0.63
 -3 13 -4 9.38 0.88
 -3 13 4 6.3 0.59
 3 -13 -4 7.57 0.69
 3 -13 4 10.63 0.92
 13 3 -4 7.49 0.65
 13 3 4 9.99 0.56
 -13 -3 6 129.18 2.02
 -3 13 -6 153.29 2.59
 3 -13 -6 135.38 2.17
 3 -13 6 159.81 2.46
 13 3 6 221.47 1.87
 -13 -4 -1 4.6 0.46
 -13 -4 1 4.38 0.53
 -4 13 1 3.81 0.43
 4 -13 -1 4.15 0.64
 4 -13 -1 4.77 0.67
 4 -13 1 4.71 0.62
 4 -13 1 6.21 0.75
 13 4 -1 4.54 0.56
 13 4 1 4.95 0.52
 -13 -4 3 10.27 0.7
 -4 13 -3 10.52 0.93
 -4 13 3 7.07 0.56
 4 -13 -3 9.6 0.8
 4 -13 3 11.72 0.92
 13 4 3 11.28 0.63
 -13 -4 5 31.24 1.09
 -4 13 -5 35.03 1.37
 4 -13 -5 30.71 1.15
 4 -13 5 35.58 1.23
 13 4 5 47.08 0.99
 -13 -4 7 2.64 0.44
 -4 13 -7 2.91 0.62
 4 -13 -7 2.14 0.47
 4 -13 7 3.27 0.53
 13 4 -7 2.51 0.32
 13 4 7 4.34 0.43
 -13 -5 0 0.63 0.32
 -5 13 0 1.09 0.26
 5 -13 0 0.78 0.48
 5 -13 0 0 0.45
 13 5 0 0.84 0.39
 -13 -5 2 475.54 3.68
 -5 13 -2 463.72 5.03
 -5 13 2 338.93 2.54
 5 -13 -2 491.05 4.44
 5 -13 2 498.4 4.53
 13 5 -2 492.62 3.62
 13 5 2 534.07 3.54
 -13 -5 4 5.51 0.59
 -5 13 -4 6.18 0.83
 -5 13 4 5.61 0.53
 5 -13 -4 6.55 0.67
 5 -13 4 6.69 0.71
 13 5 4 9.73 0.61
 -13 -5 6 375.01 3.49
 -5 13 -6 376.96 4.19
 5 -13 -6 346.32 3.49
 5 -13 6 418.84 3.67
 13 5 6 628.57 3.36
 -13 -6 -1 31.59 0.87
 -13 -6 1 31.1 1
 -6 13 -1 37.55 1.68
 -6 13 1 30.82 0.71
 6 -13 -1 31.98 1.2
 6 -13 -1 38.58 1.36
 6 -13 1 33.77 1.23
 6 -13 1 28.68 1.22
 13 6 -1 35.04 1.05
 13 6 1 30.99 0.95
 -13 -6 3 21.69 0.9
 -6 13 -3 22.89 1.32
 -6 13 3 16.74 0.64
 6 -13 -3 20.69 1.06
 6 -13 3 19.98 1.01
 13 6 3 28.65 0.91
 -13 -6 5 9.34 0.66
 -6 13 -5 11.16 0.98
 -6 13 5 9.89 0.6
 6 -13 -5 9.08 0.7
 6 -13 5 9.62 0.71
 13 6 5 16.56 0.7
 -13 -7 0 0.5 0.34
 -7 13 0 1.02 0.63
 7 -13 0 0.16 0.44
 7 -13 0 1.09 0.53
 13 7 0 0.55 0.35
 -13 -7 2 0.87 0.37
 -7 13 -2 1.66 0.74
 -7 13 2 1.48 0.28
 7 -13 -2 0.96 0.49
 7 -13 2 1.13 0.46
 13 7 2 1.95 0.43
 -13 -7 4 35.18 1.08
 -7 13 -4 39.03 1.59
 -7 13 4 32.19 0.82
 7 -13 -4 33.77 1.25
 7 -13 4 30.73 1.09
 13 7 4 58.86 1.24
 -13 -8 -1 438.93 3.1
 -13 -8 1 459.04 3.53
 -8 13 -1 638.87 6.47
 -8 13 1 346.23 3.14
 -8 13 1 540.94 4.82
 8 -13 -1 378.2 3.85
 8 -13 -1 504.76 4.65
 8 -13 1 377.47 3.78
 13 8 1 416.1 3.25
 -13 -8 3 341.63 3.12
 -8 13 -3 406.72 5.1
 -8 13 3 284.08 2.03
 8 -13 -3 320.66 3.67
 8 -13 3 249.89 2.92
 13 8 3 456.98 3.37
 -13 -9 0 0.4 0.34
 -9 13 0 0.6 0.53
 9 -13 0 -0.11 0.45
 -7 -14 -1 188.64 2.41
 -7 -14 1 196.73 2.51
 14 -7 -1 164.48 2.26
 14 -7 1 176.7 2.29
 -6 -14 0 101.45 1.84
 14 -6 0 97.79 1.8
 -14 6 2 3.32 0.55
 -6 -14 -2 3.11 0.5
 -6 -14 2 3.55 0.53
 6 14 -2 3.95 0.46
 14 -6 -2 4.91 0.77
 14 -6 -2 2.93 0.52
 14 -6 2 4.43 0.58
 -5 -14 -1 240.74 2.81
 -5 -14 1 240.49 2.77
 5 14 -1 284.34 2.9
 14 -5 -1 251.23 2.82
 14 -5 1 278.71 2.99
 -14 5 3 191.06 2.54
 -5 -14 -3 161.4 2.29
 -5 -14 3 156 2.25
 5 14 -3 183.35 2.1
 14 -5 -3 185.53 2.89
 14 -5 -3 161.69 2.23
 14 -5 3 222.03 2.49
 -4 -14 0 2.36 0.46
 4 14 0 3.97 0.54
 14 -4 0 4.49 0.58
 -14 4 2 2.97 0.5
 -4 -14 -2 3 0.51
 -4 -14 2 3.98 0.53
 4 14 -2 2.97 0.44
 14 -4 -2 3.33 0.62
 14 -4 -2 3.43 0.53
 14 -4 2 3.73 0.52
 -14 4 4 33.46 1.13
 -4 -14 -4 33.59 1.16
 -4 -14 4 26.95 0.99
 4 14 -4 30.56 1.14
 4 14 -4 25.97 0.68
 14 -4 -4 30.97 1.2
 14 -4 4 36.51 1.02
 -14 3 1 6.64 0.62
 -3 -14 -1 7.29 0.67
 -3 -14 1 7.17 0.66
 3 14 -1 6.87 0.6
 3 14 1 7.85 0.76
 14 -3 -1 8.84 0.69
 14 -3 1 7.9 0.66
 -14 3 3 42.46 1.22
 -3 -14 -3 53.11 1.45
 -3 -14 3 46.66 1.27
 3 14 -3 49.58 1.04
 14 -3 -3 50.03 1.49
 14 -3 -3 56.19 1.36
 14 -3 3 69.27 1.36
 -14 3 5 1.84 0.46
 -3 -14 -5 0.47 0.43
 -3 -14 5 0.92 0.42
 -3 -14 5 0.7 0.53
 3 14 -5 1.02 0.49
 14 -3 -5 0.09 0.4
 14 -3 5 2.97 0.45
 -2 -14 0 528.12 4.37
 2 14 0 439.43 3.82
 14 -2 0 642.55 4.23
 -14 2 2 3.37 0.52
 -2 -14 -2 1 0.44
 -2 -14 2 1.96 0.48
 2 14 -2 1.72 0.35
 14 -2 -2 3.04 0.56
 14 -2 -2 1.79 0.45
 14 -2 2 1.95 0.43
 -14 2 4 448.39 3.73
 -2 -14 -4 620.32 4.73
 -2 -14 4 496.12 4.04
 -2 -14 4 549.5 4.68
 2 14 -4 617.84 4.95
 14 -2 -4 526.95 4.43
 14 -2 4 684.85 3.96
 -14 2 6 26.91 1.01
 -2 -14 -6 22.78 0.98
 -2 -14 6 23.19 1.12
 2 14 -6 26.19 1.11
 14 -2 -6 23.95 1.02
 14 -2 6 27.16 0.75
 -14 1 1 7.09 0.63
 -1 -14 -1 7.72 0.75
 -1 -14 1 8.53 0.75
 1 14 -1 6.15 0.56
 1 14 1 6.82 0.67
 14 -1 -1 5.92 0.71
 14 -1 -1 8.79 0.69
 14 -1 1 8.26 0.68
 -14 1 3 14.83 0.8
 -1 -14 -3 19.34 0.95
 -1 -14 3 15.86 0.88
 -1 -14 3 16.85 1.04
 1 14 -3 10.91 0.41
 14 -1 -3 15.31 0.9
 14 -1 -3 19.16 0.89
 14 -1 3 20.75 0.83
 -14 1 5 7.17 0.61
 -1 -14 -5 9.22 0.75
 -1 -14 5 6.56 0.65
 -1 -14 5 8.59 0.86
 1 14 -5 8.36 0.8
 14 -1 -5 7.49 0.65
 14 -1 5 11.72 0.58
 -14 0 0 250.79 2.58
 0 -14 0 201.03 2.76
 0 14 0 148.08 2.17
 14 0 0 242.94 2.67
 -14 0 2 10.78 0.7
 0 -14 -2 9.46 0.8
 0 -14 2 10.78 0.77
 0 -14 2 11.51 0.89
 0 14 -2 7.45 0.43
 0 14 2 8.95 0.74
 14 0 -2 8.56 0.73
 14 0 -2 12.8 0.74
 14 0 2 12.14 0.71
 -14 0 4 130.94 2.04
 0 -14 -4 160.61 2.49
 0 -14 4 146 2.32
 0 -14 4 161.1 2.61
 0 14 -4 140.76 2.5
 14 0 -4 140.15 2.2
 14 0 4 157.18 1.79
 -14 0 6 26.07 0.97
 0 -14 -6 28.92 1.08
 0 -14 6 31.34 1.26
 0 14 -6 31.72 1.23
 14 0 -6 29.43 1.07
 14 0 6 31.85 0.76
 -14 -1 1 126.8 1.96
 -1 14 -1 71.54 1.14
 -1 14 1 78.43 1.54
 1 -14 -1 118.54 2.17
 1 -14 1 115.75 2.08
 1 -14 1 145.37 2.46
 14 1 -1 102.45 2.02
 14 1 -1 148.02 2.16
 14 1 1 150.33 2.09
 -14 -1 3 71.2 1.55
 -1 14 -3 78.81 1.96
 -1 14 3 62.87 1.58
 1 -14 -3 88.31 1.92
 1 -14 3 72.56 1.67
 1 -14 3 97.2 2.11
 14 1 -3 75.27 1.67
 14 1 -3 81.92 1.58
 14 1 3 84.45 1.4
 -14 -1 5 74.34 1.55
 -1 14 -5 90.53 1.99
 1 -14 -5 91.11 1.86
 1 -14 5 110.49 2.21
 14 1 -5 92.91 1.78
 14 1 5 98.76 1.34
 -14 -2 0 199.76 2.18
 -2 14 0 100.06 1.43
 2 -14 0 174.84 2.57
 14 2 0 195.05 2.45
 -14 -2 2 3.44 0.51
 -2 14 2 2.04 0.4
 2 -14 -2 4.61 0.69
 2 -14 2 3.6 0.59
 2 -14 2 4.61 0.73
 14 2 -2 3.97 0.57
 14 2 -2 4.99 0.61
 14 2 2 3.32 0.44
 -14 -2 4 77.89 1.64
 -2 14 -4 89.6 2.07
 -2 14 4 63.15 1.49
 2 -14 -4 94.74 1.95
 2 -14 4 120.68 2.4
 14 2 -4 82.33 1.71
 14 2 4 102.5 1.45
 -14 -2 6 2.44 0.43
 -2 14 -6 2.95 0.62
 2 -14 -6 2.71 0.52
 2 -14 6 4.15 0.67
 14 2 -6 3.92 0.54
 14 2 6 3.32 0.4
 -14 -3 1 611.86 4.06
 -3 14 -1 502.48 2.26
 -3 14 1 337.8 2.66
 3 -14 -1 558.52 4.66
 3 -14 1 514.31 4.31
 3 -14 1 730.46 5.59
 14 3 -1 600.51 4.16
 14 3 1 577.26 3.9
 -14 -3 3 409.06 3.59
 -3 14 -3 394.08 4.41
 -3 14 3 255.71 2.6
 3 -14 -3 459.06 4.29
 3 -14 3 629.13 5.39
 14 3 3 473 3.22
 -14 -3 5 208.89 2.57
 -3 14 -5 209.06 3.09
 3 -14 -5 211.16 2.81
 3 -14 5 300.6 3.6
 14 3 5 308.36 2.4
 -14 -4 0 190.58 2.1
 -4 14 0 158.03 1.44
 4 -14 0 182.54 2.66
 4 -14 0 224.06 3.08
 14 4 0 206.25 2.42
 -14 -4 2 15.96 0.82
 -4 14 -2 15.58 1.09
 -4 14 2 11.55 0.61
 4 -14 -2 17.08 1.01
 4 -14 2 13.87 0.85
 4 -14 2 20.57 1.13
 14 4 -2 18.6 0.84
 14 4 2 16.6 0.76
 -14 -4 4 176.88 2.41
 -4 14 -4 195.44 3.11
 -4 14 4 135.62 1.89
 4 -14 -4 183.68 2.71
 4 -14 4 225.29 3.15
 14 4 4 230.91 2.22
 -14 -5 1 9.1 0.65
 -5 14 -1 8.75 1.04
 -5 14 1 6.18 0.4
 5 -14 -1 8.12 0.75
 5 -14 1 8.52 0.78
 5 -14 1 8.11 0.83
 14 5 -1 8.35 0.65
 14 5 1 7.43 0.59
 -14 -5 3 2.6 0.47
 -5 14 -3 1.8 0.63
 -5 14 3 1.58 0.33
 5 -14 -3 2.98 0.61
 5 -14 3 2.49 0.58
 14 5 3 2.46 0.45
 -14 -6 0 297.06 2.64
 -6 14 0 329.61 4.16
 6 -14 0 260.87 3.19
 6 -14 0 283.28 3.47
 14 6 0 290.28 2.81
 -14 -6 2 5.49 0.55
 -6 14 -2 7.08 0.98
 -6 14 2 5 0.41
 6 -14 -2 5.53 0.67
 6 -14 2 6.61 0.78
 14 6 2 6.65 0.62
 -14 -7 1 9.79 0.64
 -7 14 -1 11.63 1.14
 -7 14 1 10.88 0.93
 7 -14 -1 10.22 0.83
 7 -14 1 9.14 0.83
 14 7 1 15.5 0.77
 -5 -15 0 0.37 0.39
 5 15 0 0.99 0.37
 15 -5 0 0.18 0.42
 -4 -15 -1 329.85 3.41
 -4 -15 1 296.43 3.15
 4 15 -1 332.4 3.12
 15 -4 -1 354.08 3.36
 15 -4 1 317.96 3.08
 -3 -15 0 0.53 0.38
 3 15 0 0.12 0.35
 15 -3 0 0.76 0.39
 -15 3 2 175.77 2.39
 -3 -15 -2 184.13 2.64
 -3 -15 2 193.53 2.58
 3 15 -2 170.65 2.02
 15 -3 -2 179.88 2.73
 15 -3 -2 207.76 2.58
 15 -3 2 232.63 2.53
 -2 -15 -1 102.77 2.06
 -2 -15 1 92.93 1.87
 2 15 -1 90.22 1.58
 2 15 1 84.1 1.79
 15 -2 -1 105.22 1.83
 15 -2 1 125.03 1.92
 -15 2 3 62.56 1.44
 -2 -15 -3 84.22 1.87
 -2 -15 3 72.02 1.63
 2 15 -3 53.72 0.84
 15 -2 -3 72.64 1.75
 15 -2 -3 79.57 1.61
 15 -2 3 100.55 1.68
 -1 -15 0 0.44 0.44
 1 15 0 0.19 0.33
 15 -1 0 1.4 0.44
 -15 1 2 0.83 0.4
 -1 -15 -2 0.91 0.48
 -1 -15 2 0.74 0.45
 1 15 -2 0.33 0.23
 1 15 2 1.47 0.49
 15 -1 -2 1.61 0.46
 15 -1 -2 1.52 0.47
 15 -1 2 0.35 0.4
 -15 1 4 1.42 0.41
 -1 -15 -4 2.07 0.55
 -1 -15 4 1.82 0.48
 -1 -15 4 2.47 0.62
 1 15 -4 2.16 0.55
 15 -1 -4 1.9 0.48
 15 -1 4 2.75 0.46
 -15 0 1 14.22 0.8
 0 -15 -1 15.9 0.97
 0 -15 1 12.78 0.84
 0 15 -1 8.48 0.5
 0 15 1 10.8 0.74
 15 0 -1 17.38 0.87
 15 0 1 18.42 0.89
 -15 0 3 4.03 0.54
 0 -15 -3 4.25 0.65
 0 -15 3 5.7 0.71
 0 -15 3 5.45 0.75
 0 15 -3 4.75 0.73
 0 15 3 5.27 0.65
 15 0 -3 4.11 0.59
 15 0 3 7.01 0.59
 -1 15 0 1.71 0.31
 1 -15 0 1.5 0.49
 15 1 0 1.69 0.47
 -15 -1 2 553.13 4.08
 -1 15 2 354.04 3.28
 1 -15 -2 599.69 5.02
 1 -15 2 508.63 4.42
 15 1 -2 521.44 4.38
 15 1 -2 622.71 4.39
 15 1 2 657.43 4.16
 -15 -1 4 4.98 0.58
 -1 15 -4 7.51 0.79
 1 -15 -4 6.92 0.75
 1 -15 4 8.06 0.82
 15 1 -4 5.53 0.59
 15 1 4 6.09 0.52
 -15 -2 1 51.59 1.25
 -2 15 -1 38.24 0.73
 -2 15 1 27.12 0.86
 2 -15 -1 44.7 1.45
 2 -15 1 44.08 1.39
 15 2 -1 39.62 1.36
 15 2 -1 52.6 1.35
 15 2 1 53.46 1.32
 -15 -2 3 32.43 1.09
 -2 15 -3 36.17 1.45
 -2 15 3 22.52 0.9
 2 -15 -3 42.59 1.41
 2 -15 3 32.25 1.2
 2 -15 3 44.52 1.56
 15 2 -3 34.91 1.19
 15 2 3 40.49 1.04
 -3 15 0 0.26 0.22
 3 -15 0 0.86 0.49
 15 3 0 0.27 0.41
 -15 -3 2 67.95 1.45
 -3 15 -2 63.27 1.93
 -3 15 2 41.86 1.04
 3 -15 -2 65.99 1.76
 3 -15 2 56.72 1.51
 3 -15 2 84.34 2.09
 15 3 -2 72.95 1.52
 15 3 2 73.71 1.43
 -15 -4 1 223.65 2.41
 -4 15 1 163.56 1.61
 4 -15 -1 199.41 2.93
 4 -15 1 182.52 2.69
 4 -15 1 250.32 3.39
 15 4 -1 228.48 2.59
 15 4 1 223.47 2.51
 -15 -5 0 0.52 0.32
 5 -15 0 0.84 0.49
 15 5 0 1.16 0.45

_publcif_info_exptl_table_max_cols 4
_publcif_info_exptl_table_use_headnotes n

loop_
_publcif_info_datablock.id
_publcif_info_datablock.publ_exptl
_publcif_info_datablock.publ_geom
_publcif_info_datablock.structure
'{84d3cb44-190c-4ff7-8fa3-c5a45ead8d8f}' y y y

loop_
_publcif_info_exptl_table_extra_item
sin_theta_over_lambda_max

loop_
_publcif_info_exptl_table_header_item
?

loop_
_publcif_info_tables.block_id
_publcif_info_tables.reference_item
"{84d3cb44-190c-4ff7-8fa3-c5a45ead8d8f}" "_publcif_info_datablock.publ_exptl"
loop_
_publcif_info_cif.paper_type
 ?
